# Supplementary material for: Selective synthesis of poly-substituted fluorine-containing pyridines and dihydropyrimidines via cascade C–F bond cleavage protocol
Source: Royal Society of Chemistry journal article supplement (doi:10.1039/c1ob05371j), 2011-01-01

## *Supporting Information*

### Selective synthesis of poly-substituted fluorine-containing pyridines and dihydropyrimidines via cascade C-F bond cleavage protocol

Zixian Chen,<sup>a,b</sup> Jiangtao Zhu,<sup>a</sup> Haibo Xie,<sup>a</sup> Shan Li,<sup>a</sup> Yongming Wu,<sup>a,\*</sup> and Yuefa Gong<sup>b,\*</sup>

#### **Table of contents**

|                                                                |        |
|----------------------------------------------------------------|--------|
| General information.....                                       | S1     |
| NMR spectra for compounds <b>3</b> , <b>4</b> , <b>5</b> ..... | S2-S43 |

#### **General:**

Melting points were measured on a Melt-Temp apparatus and uncorrected. <sup>1</sup>H NMR spectra were recorded in CDCl<sub>3</sub> and d-DMSO on a Bruker AM-300 spectrometer (300 MHz) with TMS as internal standard. <sup>19</sup>F NMR spectra were taken on a Bruker AM-300 (282 MHz) spectrometer using CFCl<sub>3</sub> as external standard. <sup>13</sup>C NMR spectra were taken on a Bruker AM-400 (100 MHz) spectrometer. IR spectra were obtained with a Nicolet AV-360 spectrophotometer. Elemental analysis was performed by the Analytical Laboratory of Shanghai Institute of Organic Chemistry. Mass spectra were recorded by EI and ESI methods, HRMS (ESI) was measured on Bruker Daltonics APEXIII 7.0 TESLA FTMS. Solvents and reagents were purchased from commercial sources and used as received. All reactions were monitored by TLC with silica gel coated plates. Flash column chromatography was carried out using 300-400 mesh silica gel at increased pressure and petroleum ether/ethyl acetate combination was used as the eluent.

## NMR spectra for compounds

**3a**

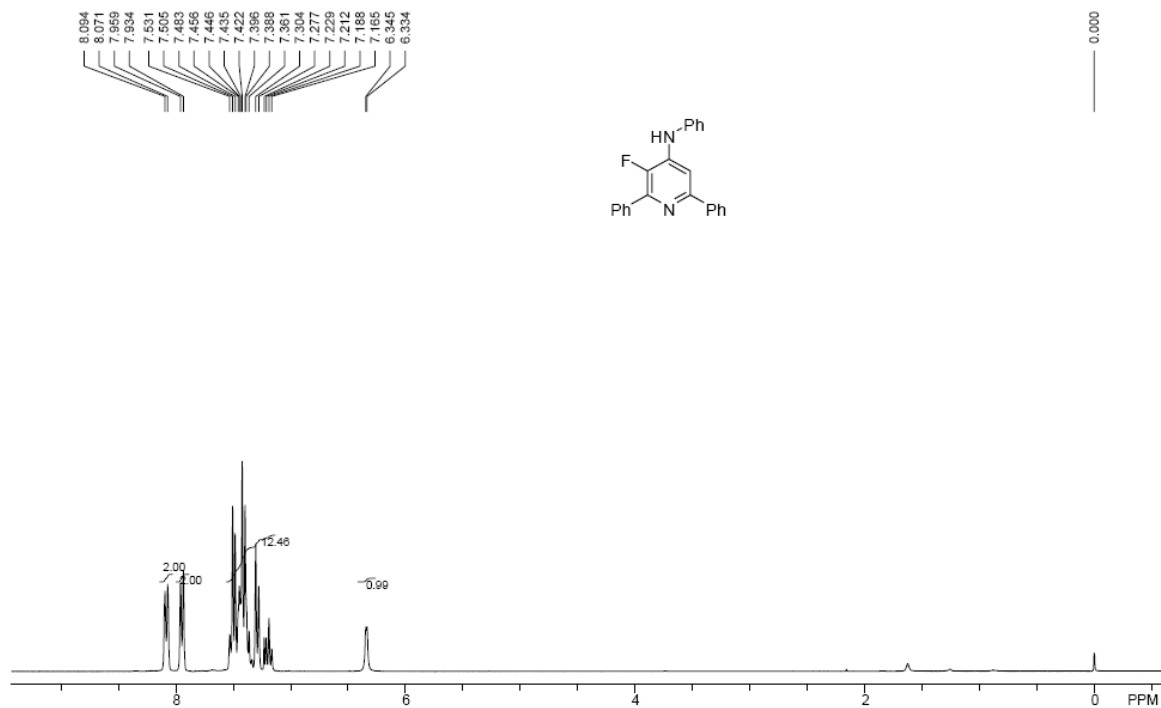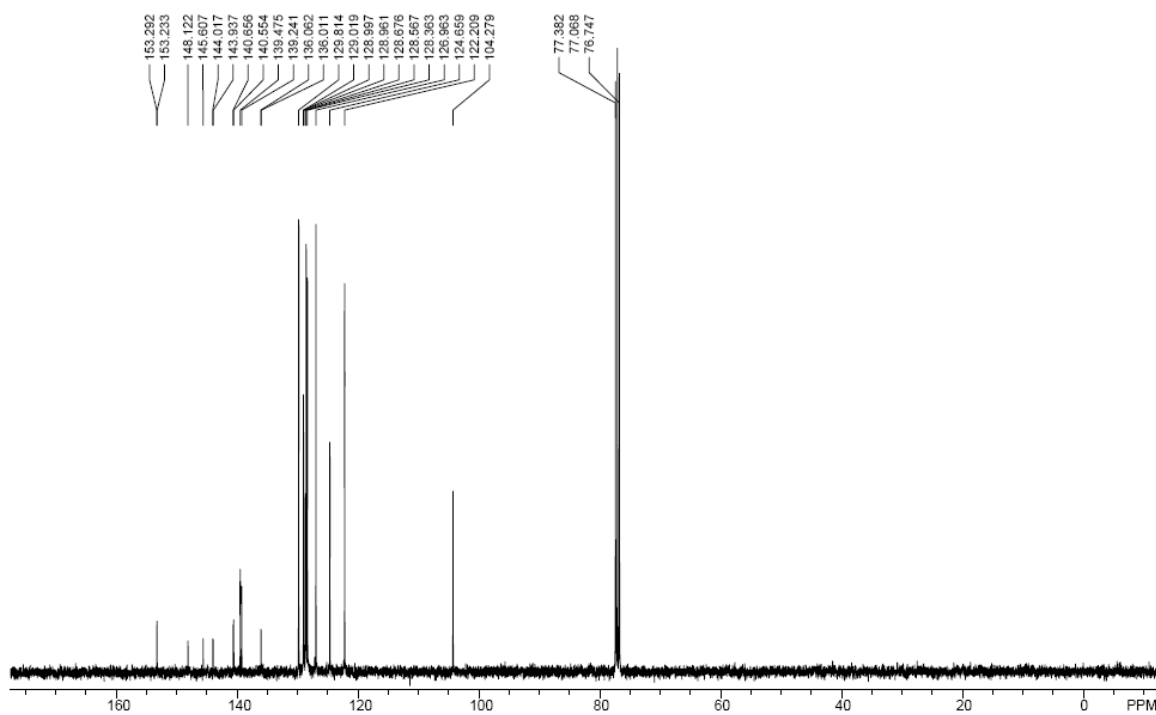

3b

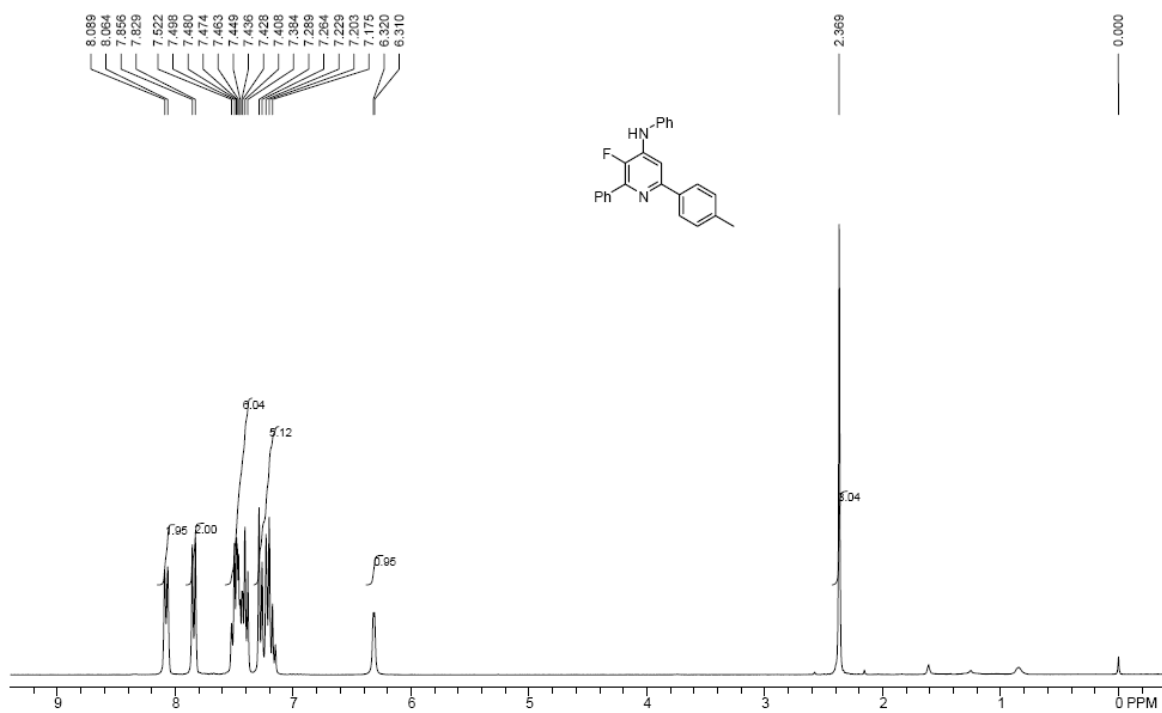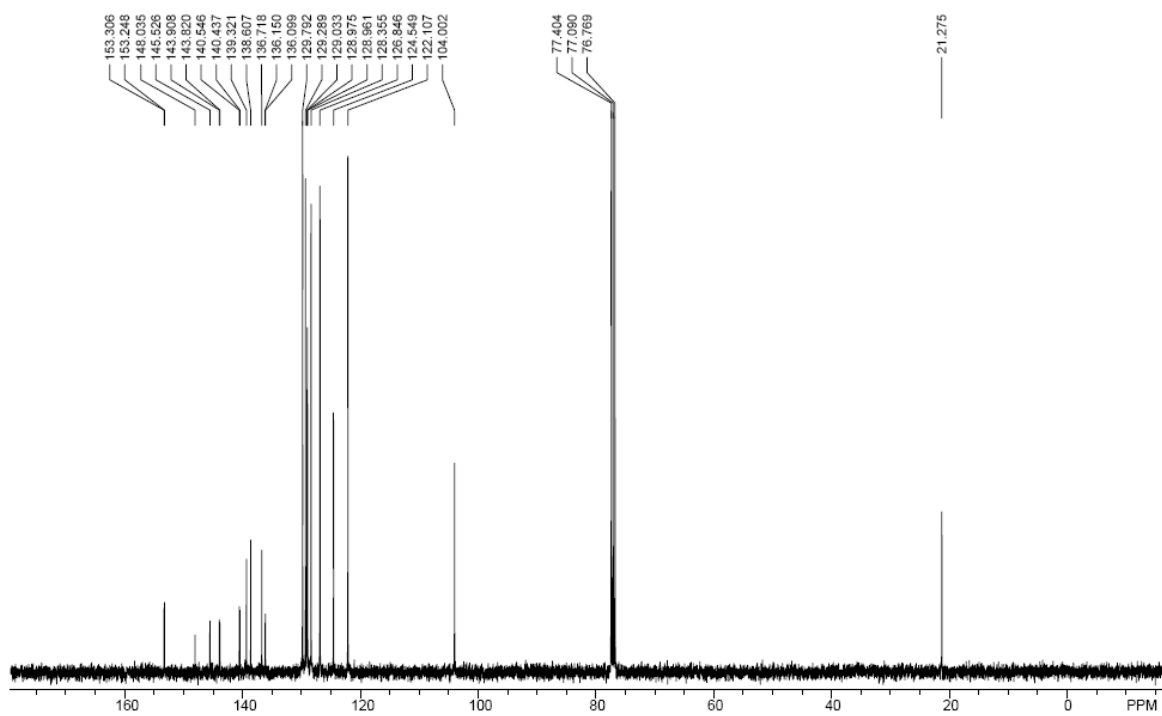

3c

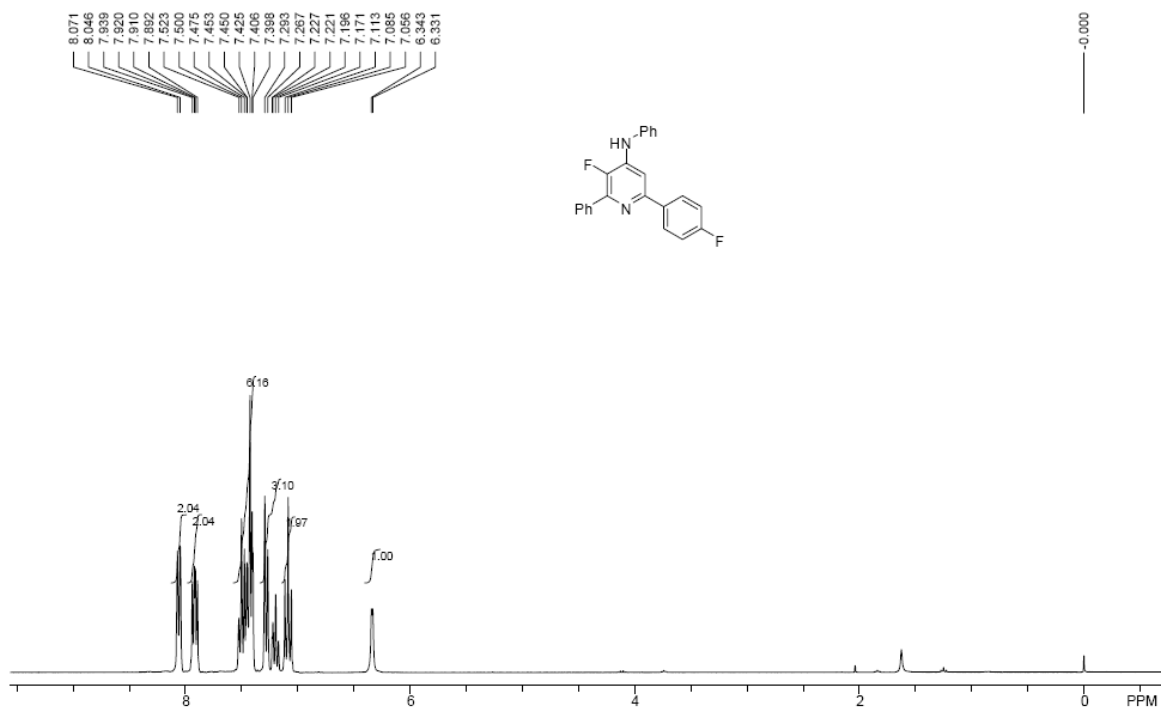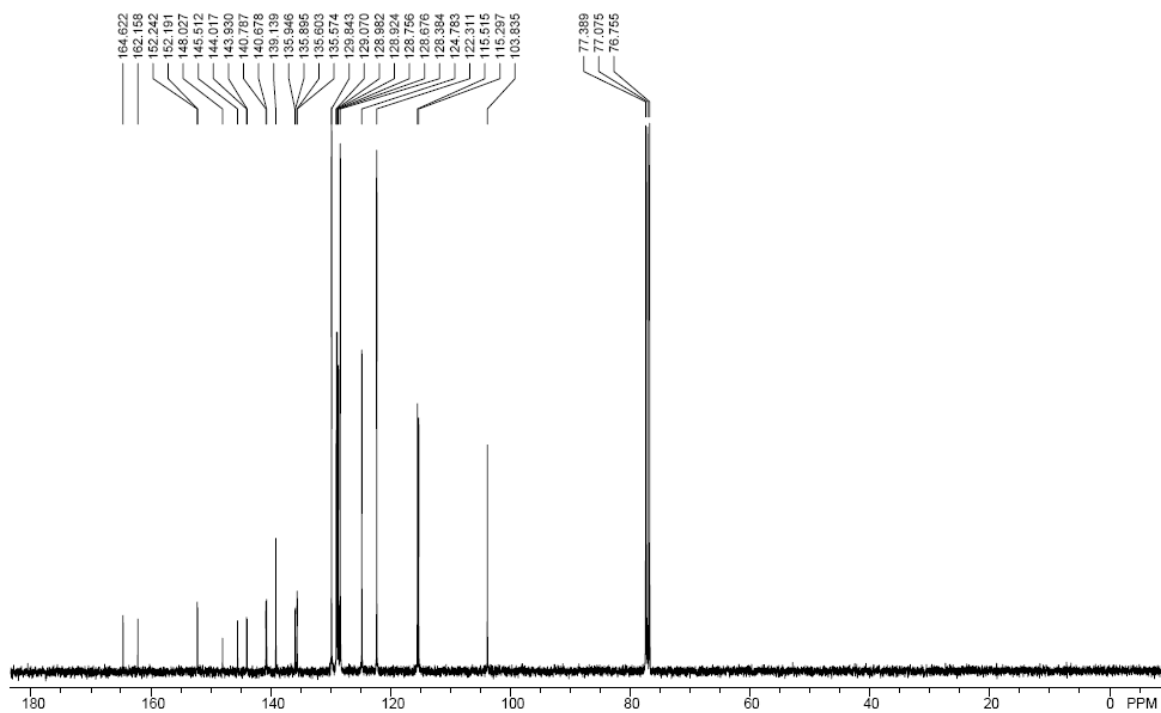

3d

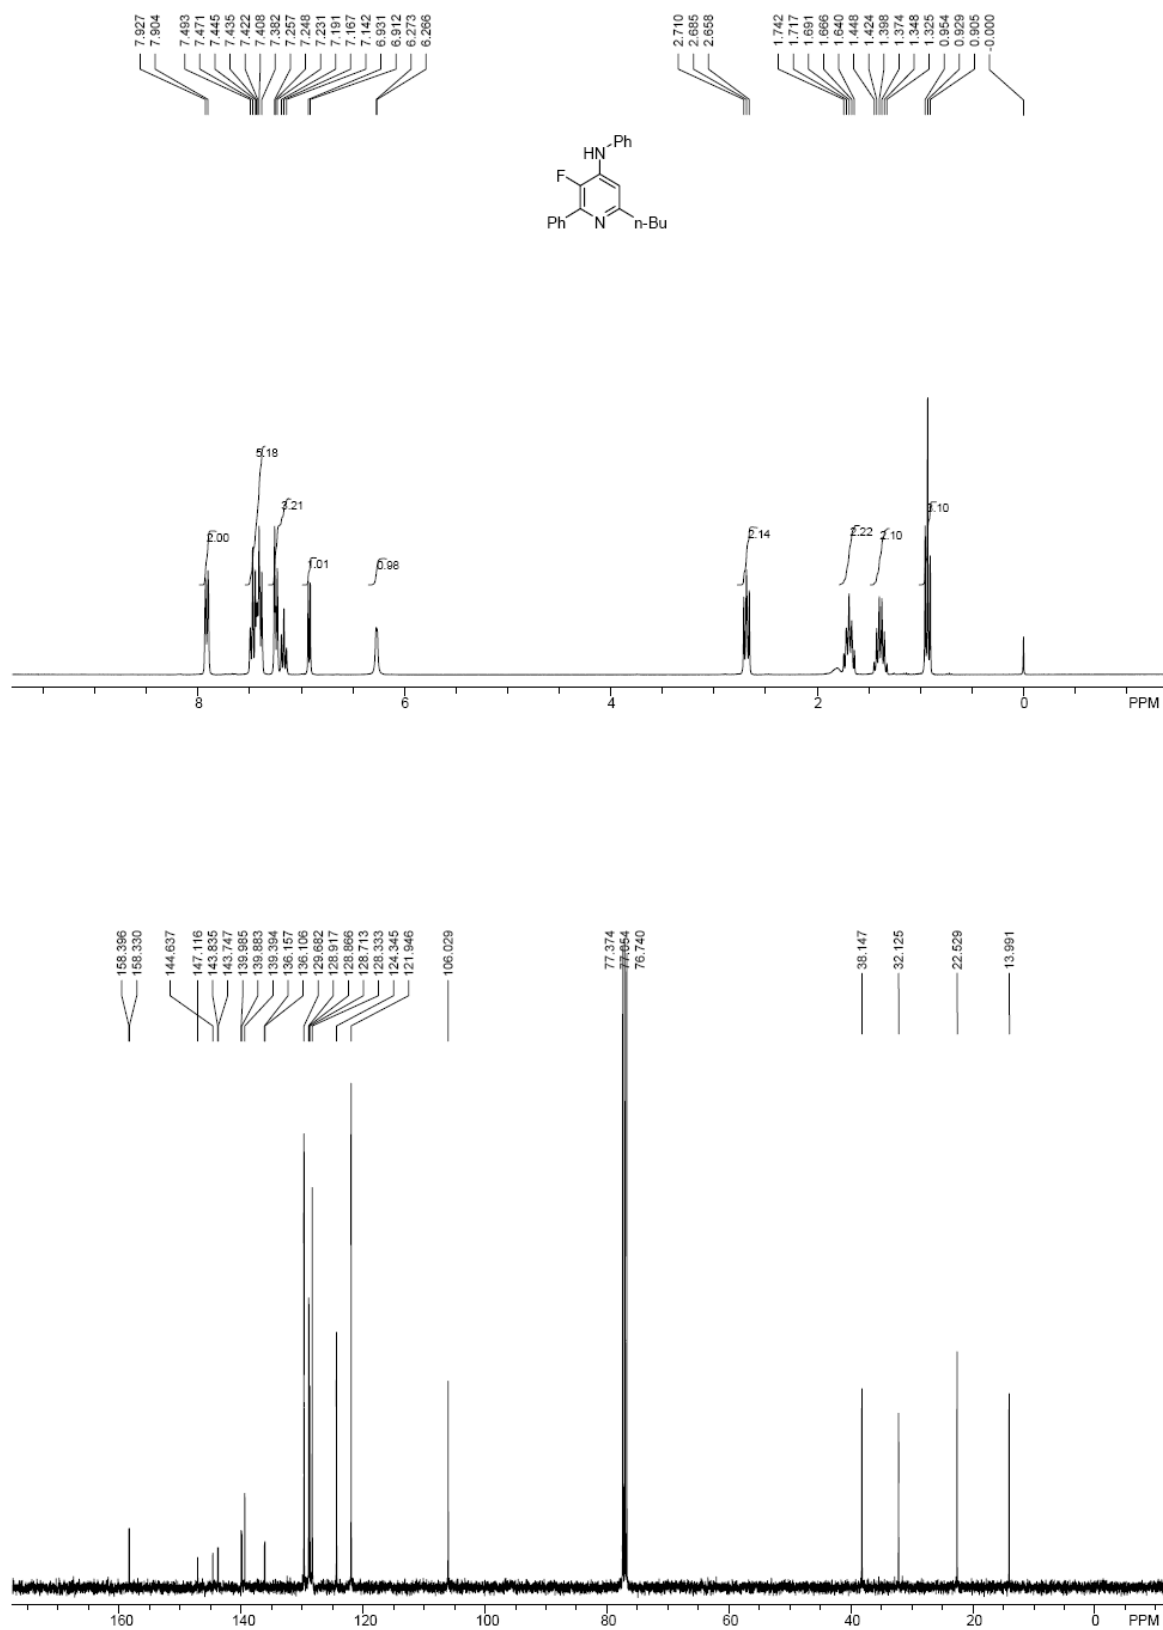

3e

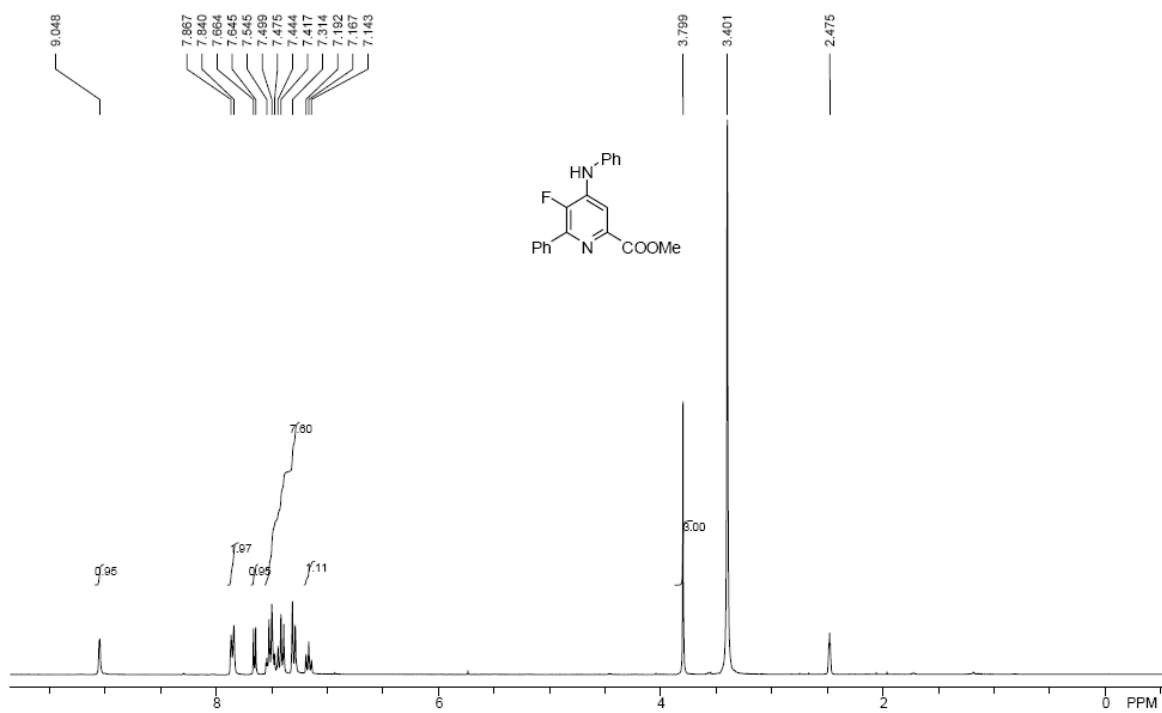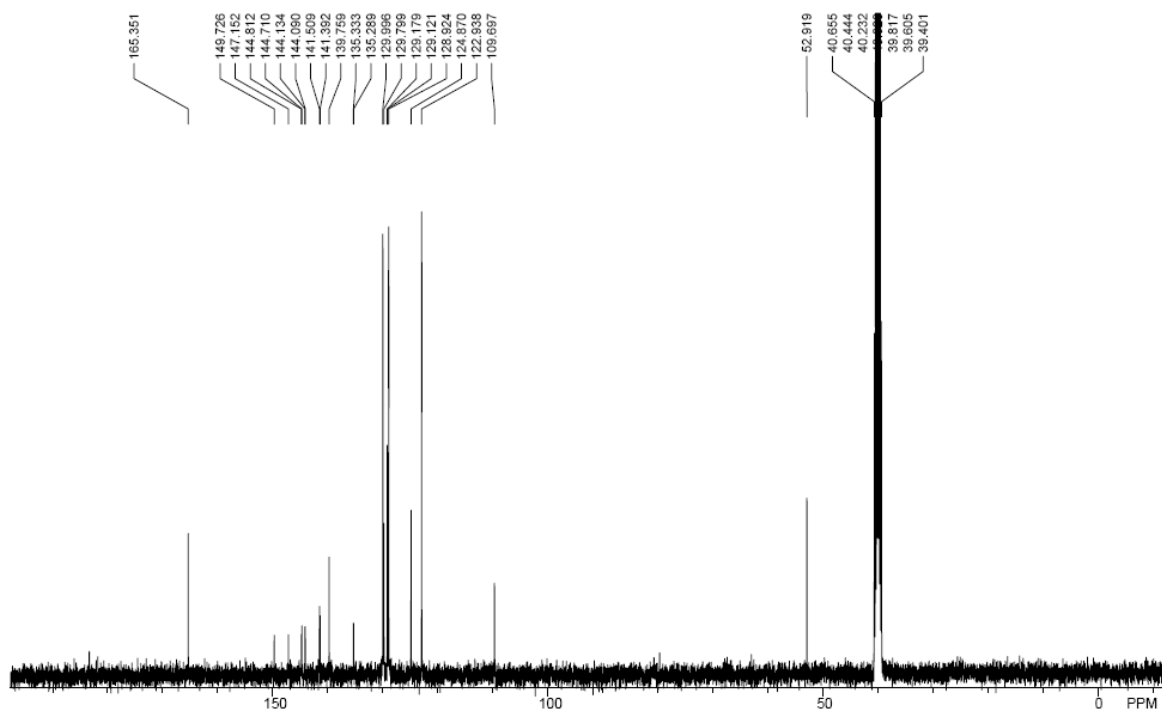

3f

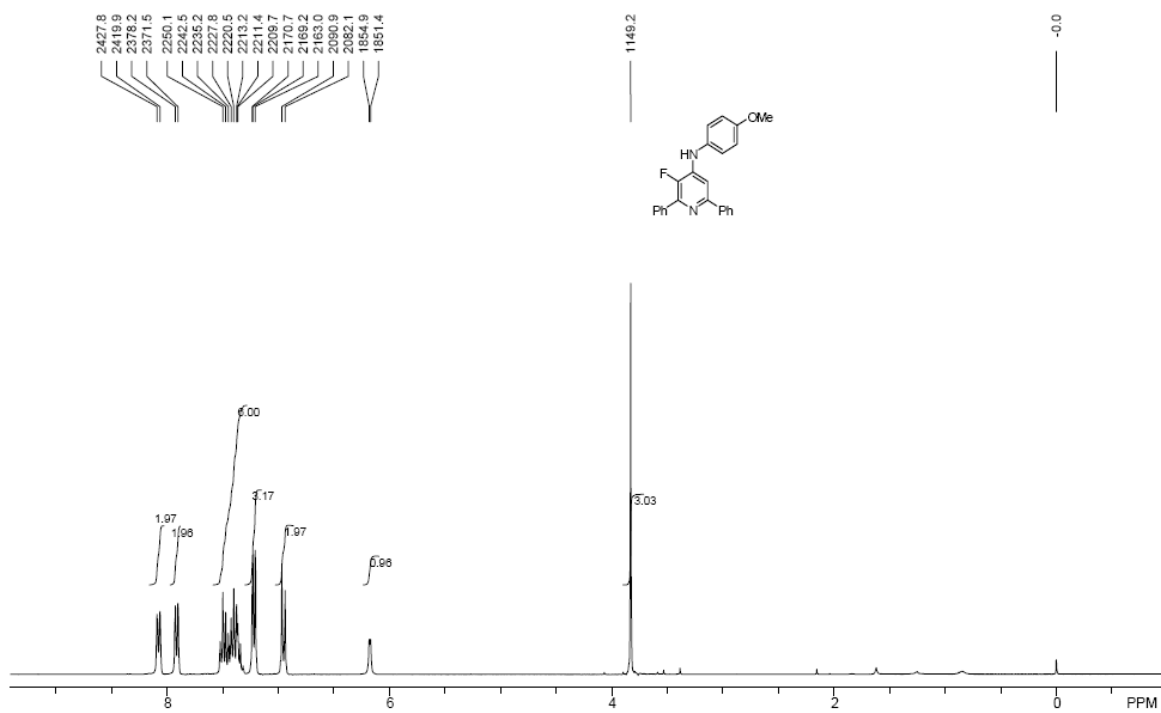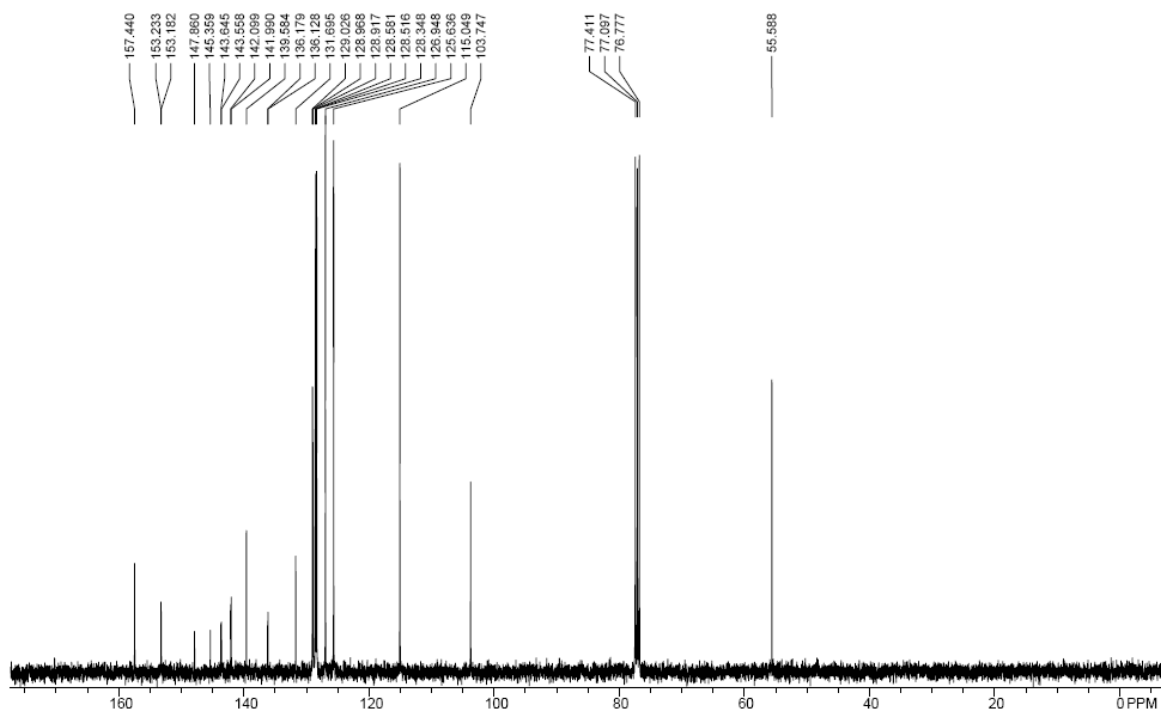

3g

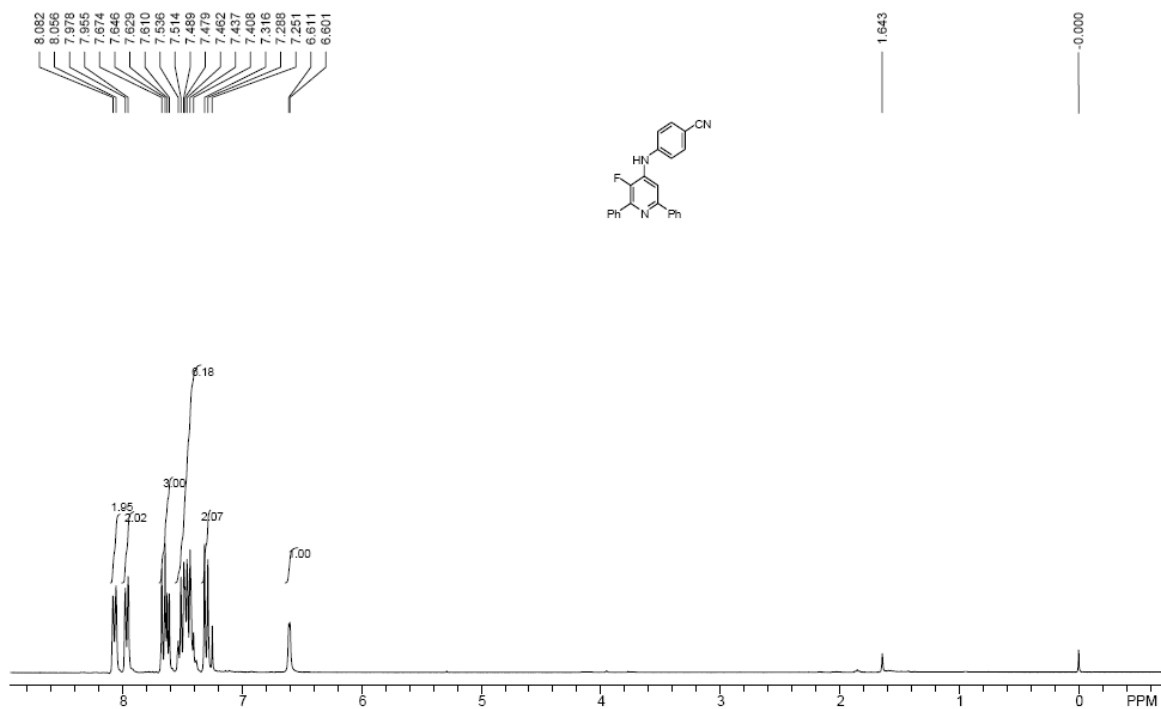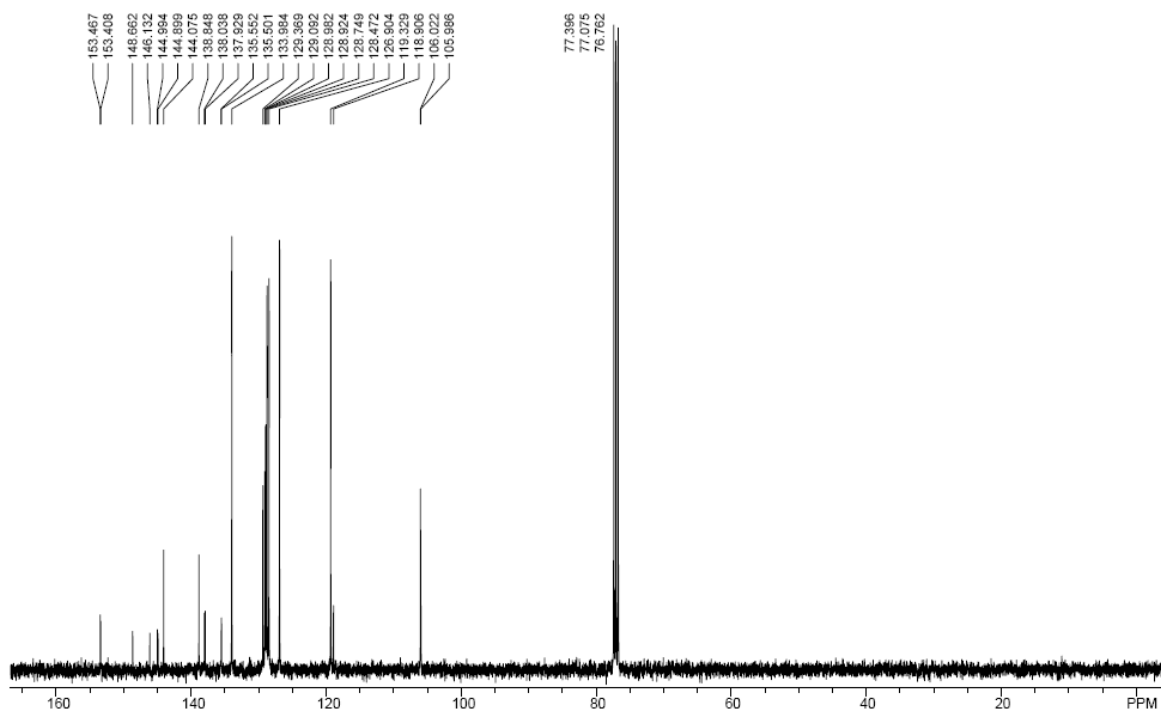



3h

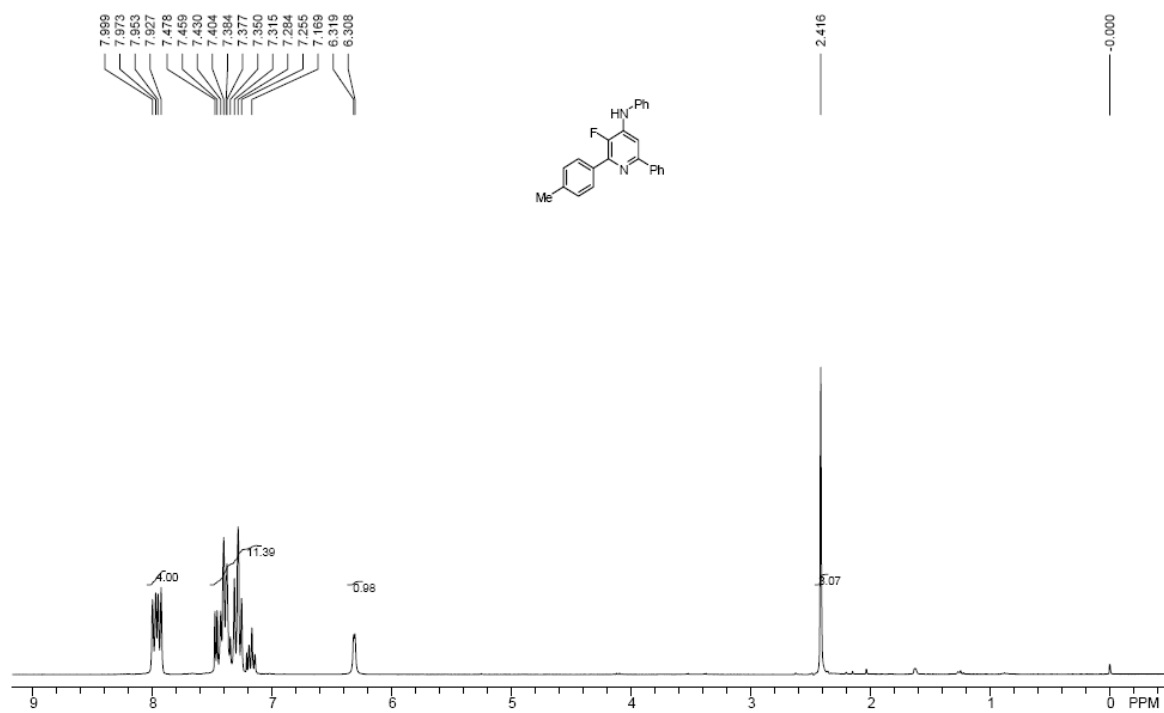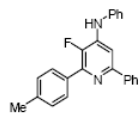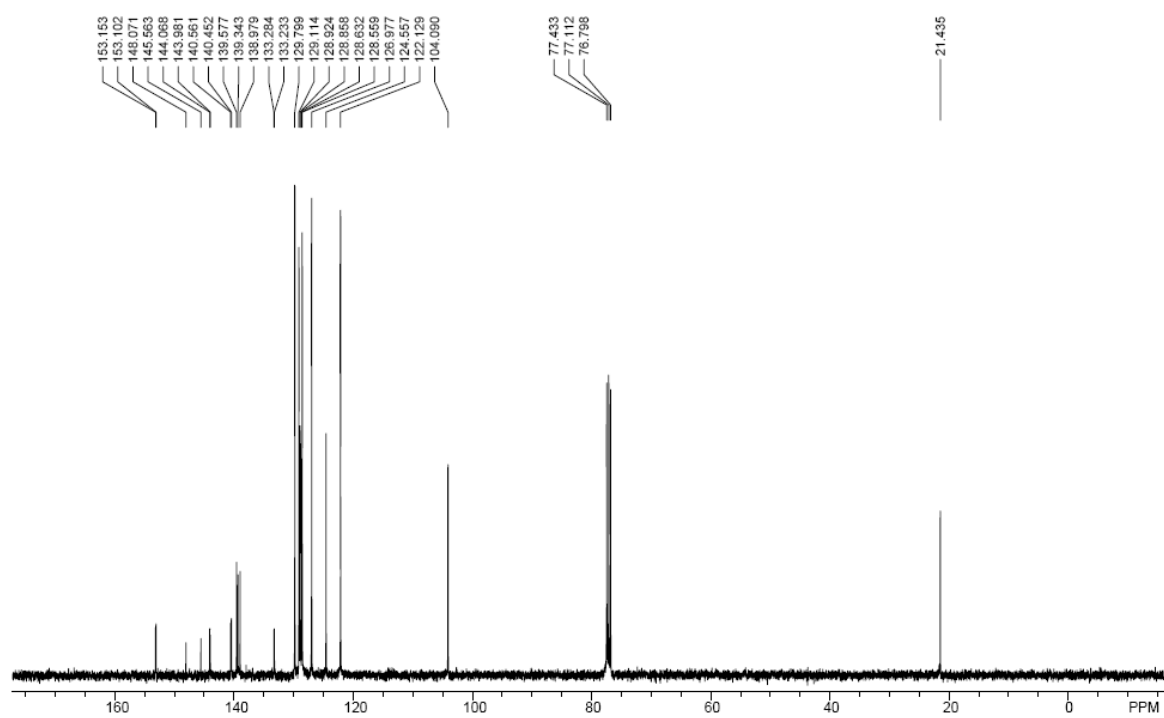

3i

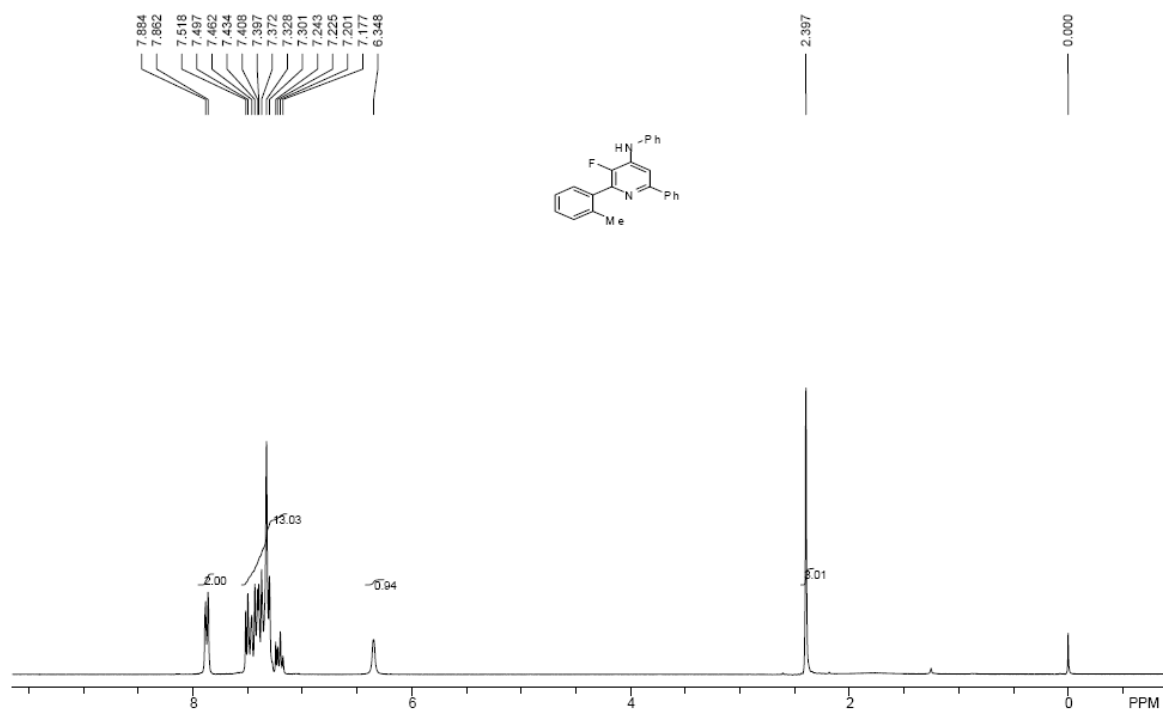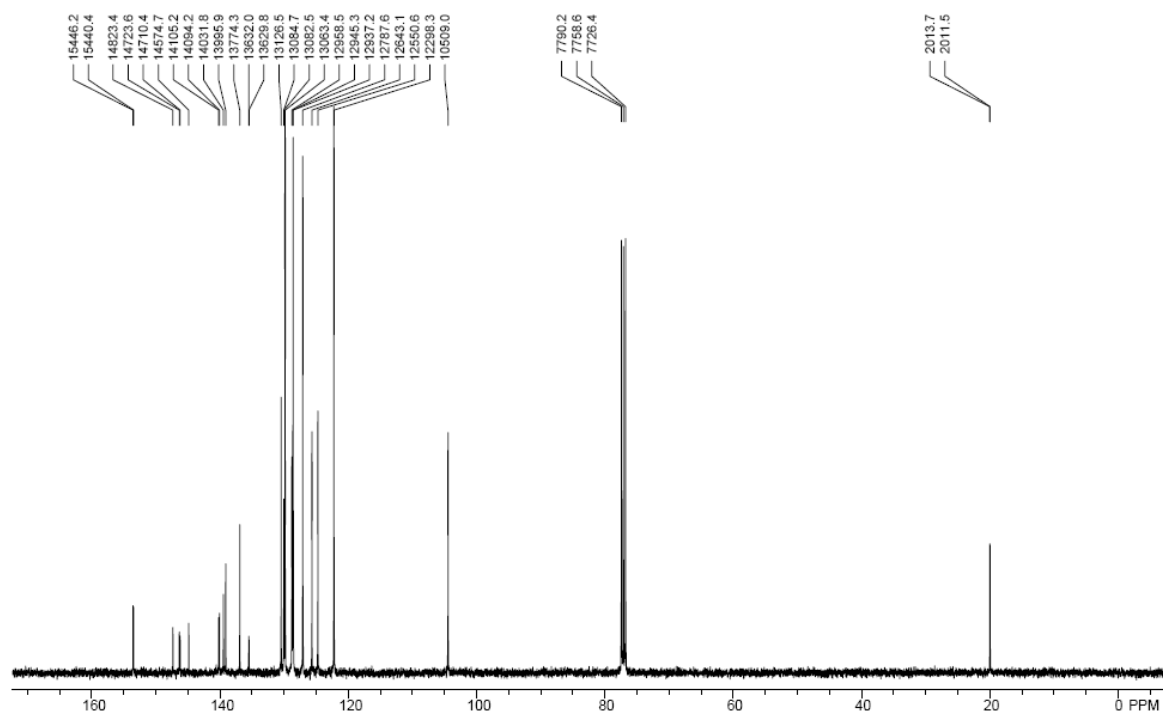

3j

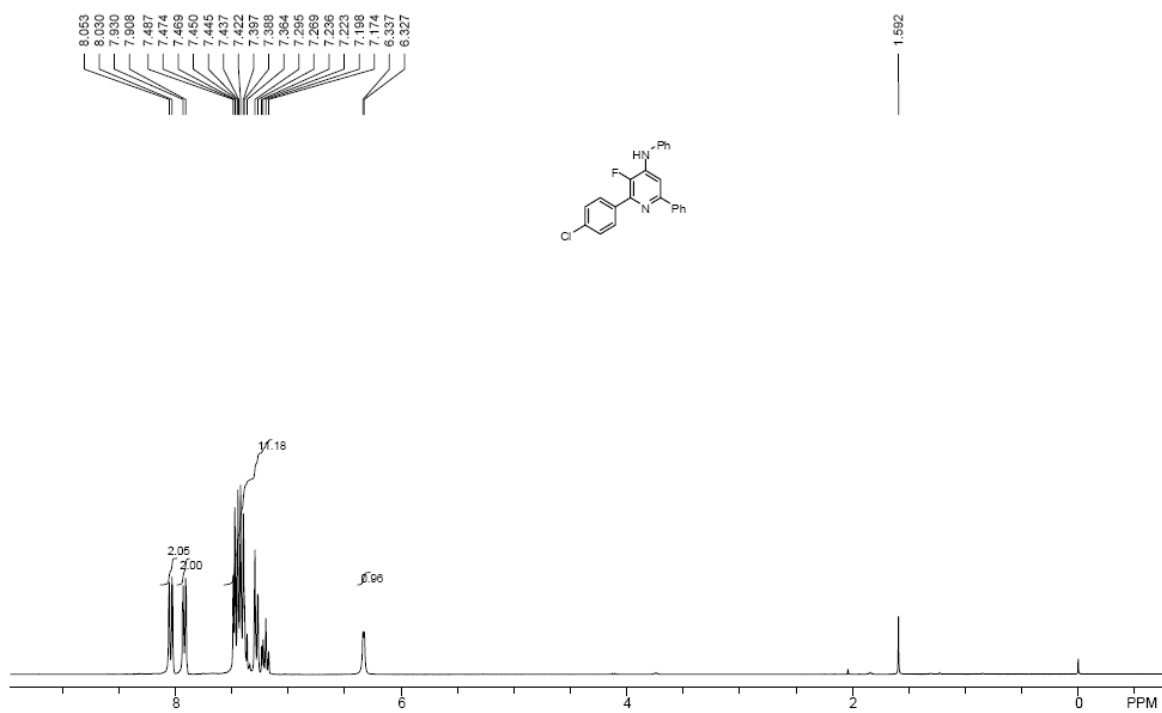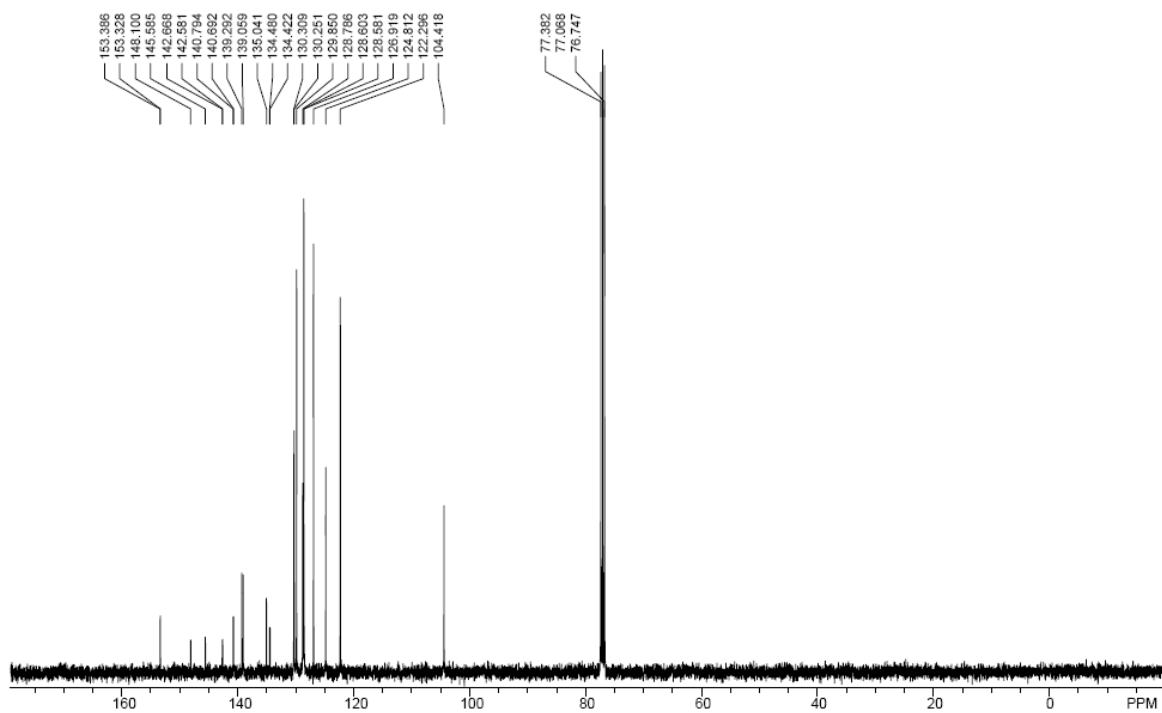

3k

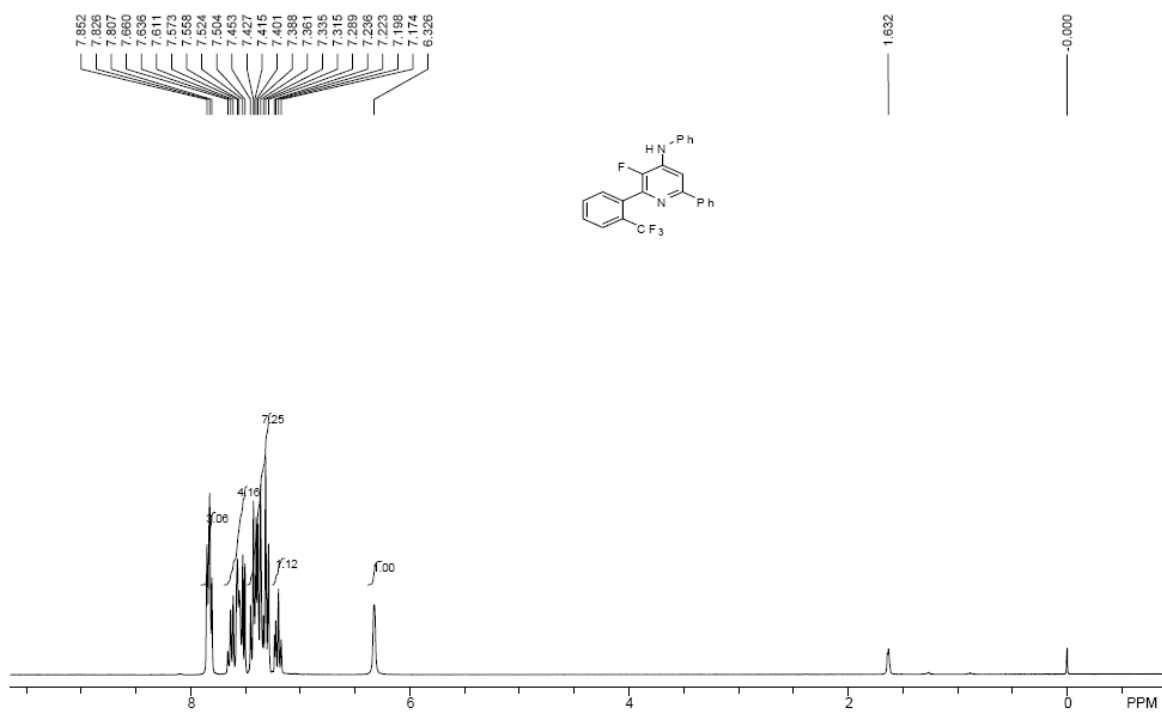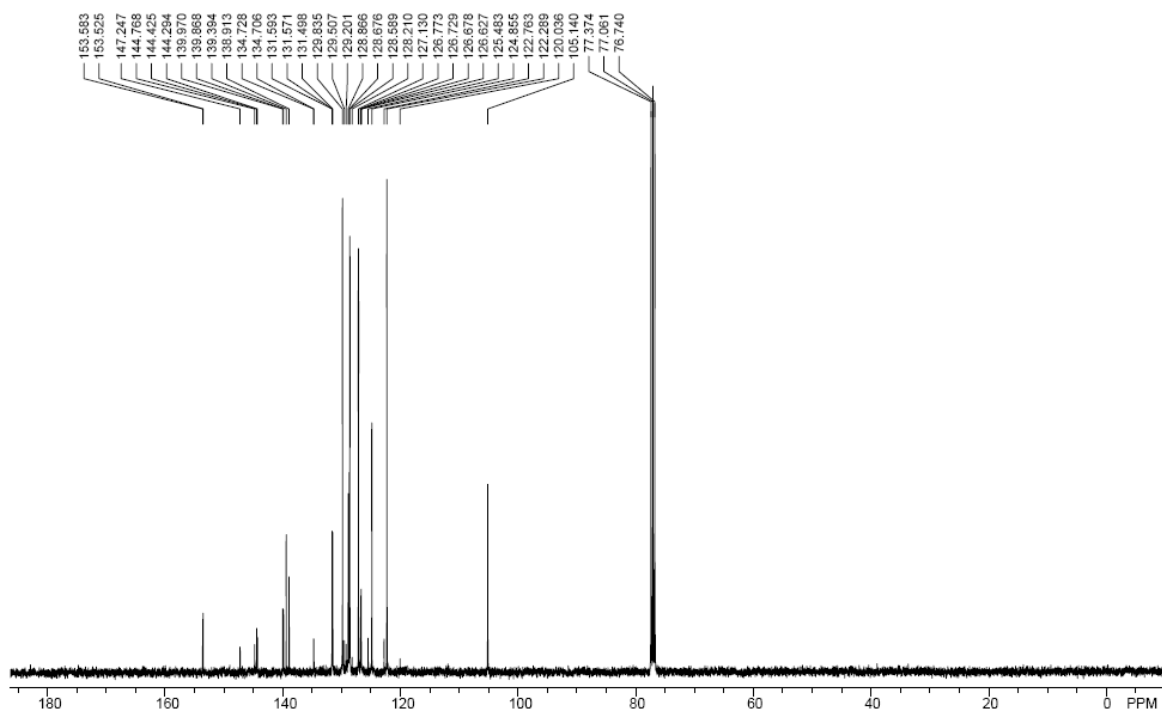

31

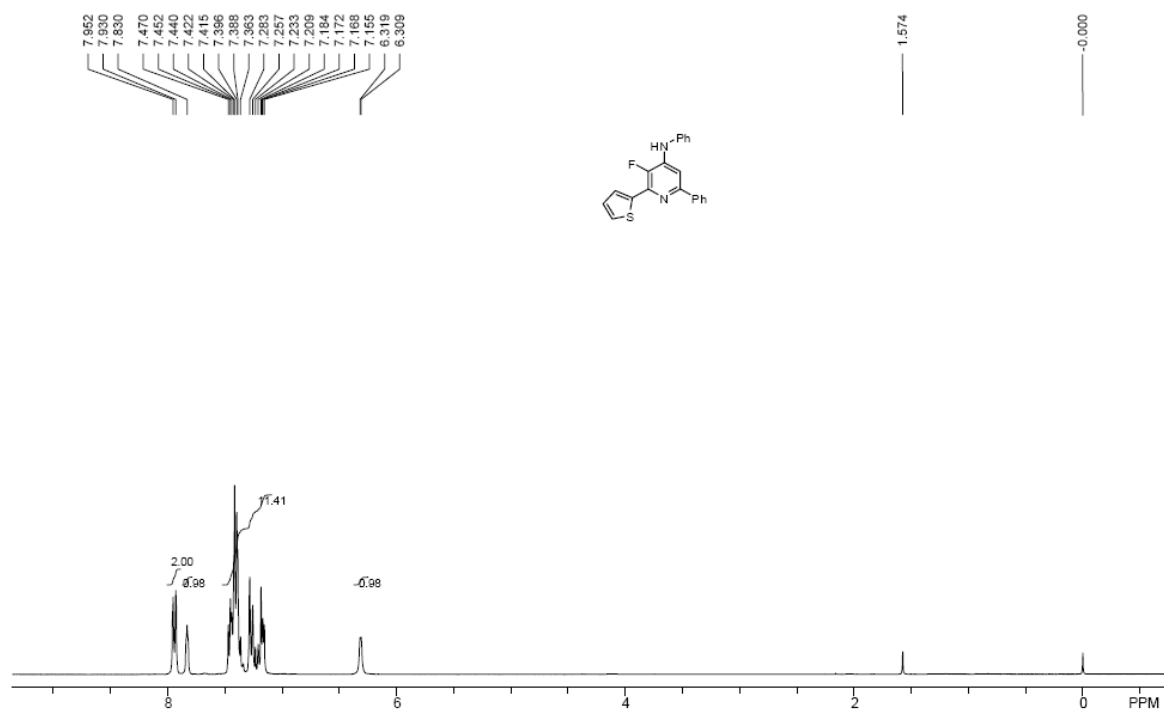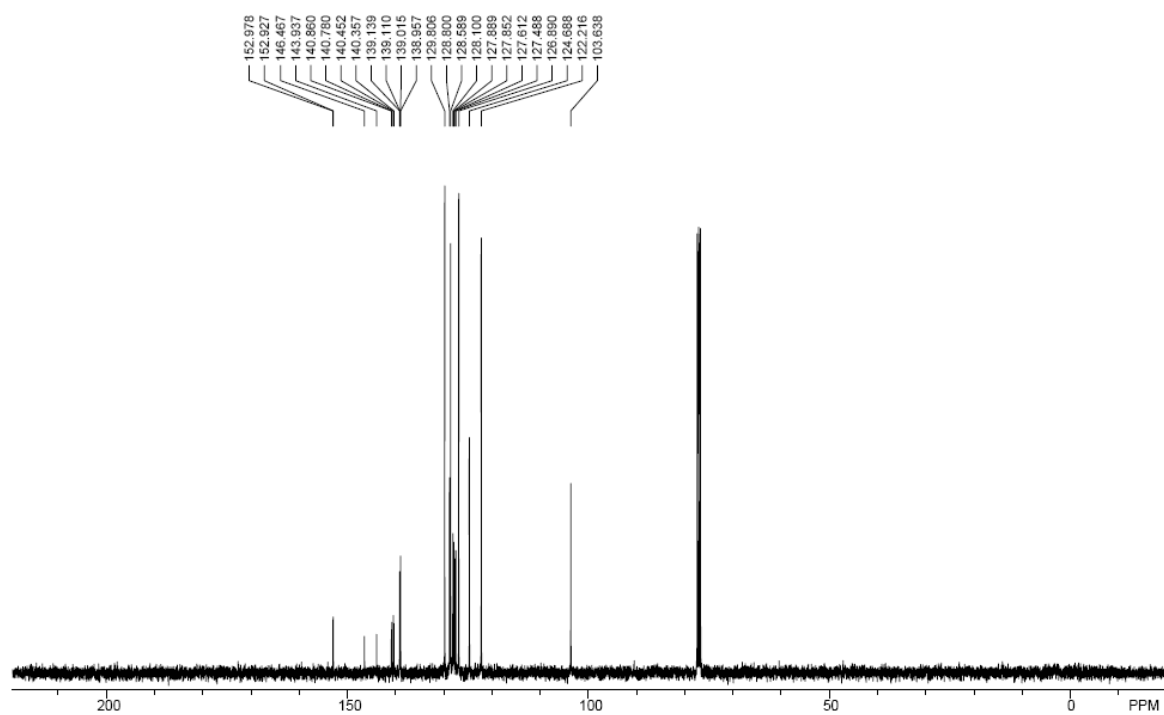

3m

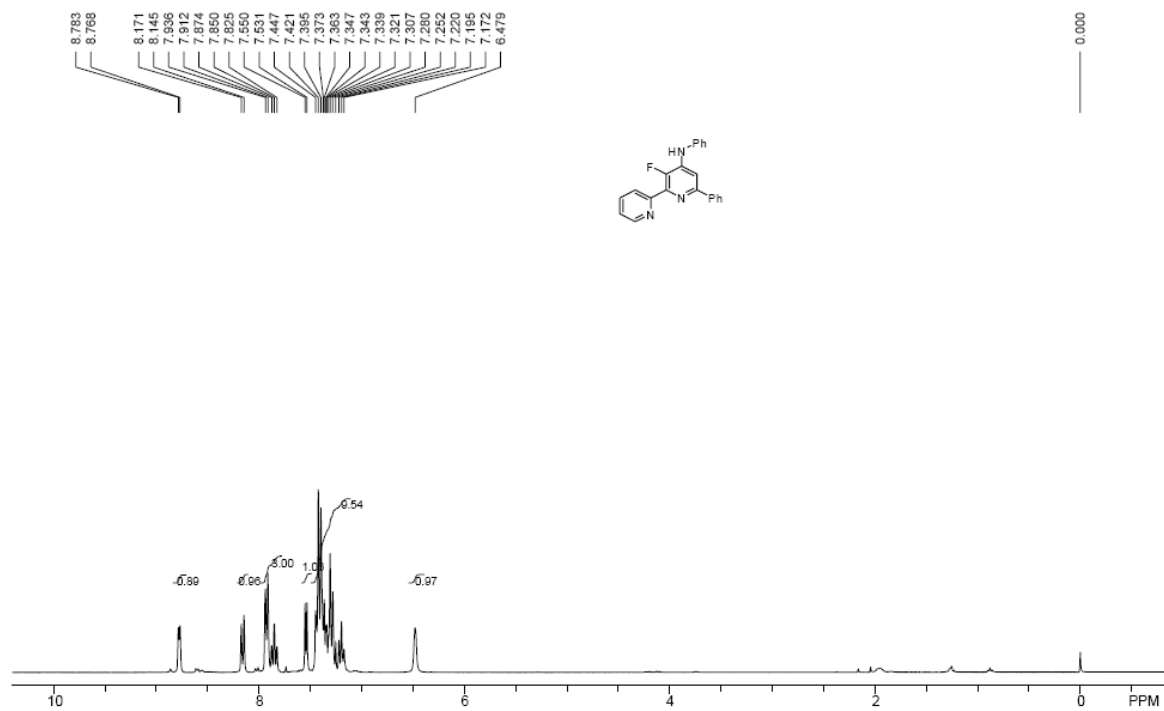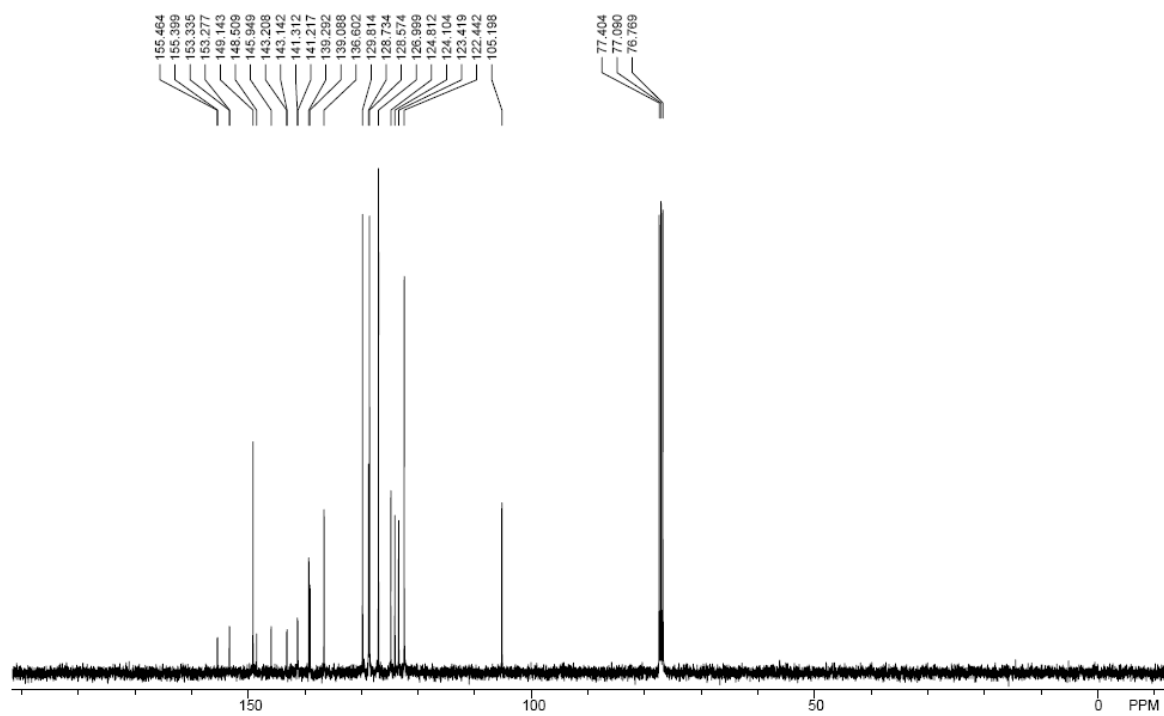

3n

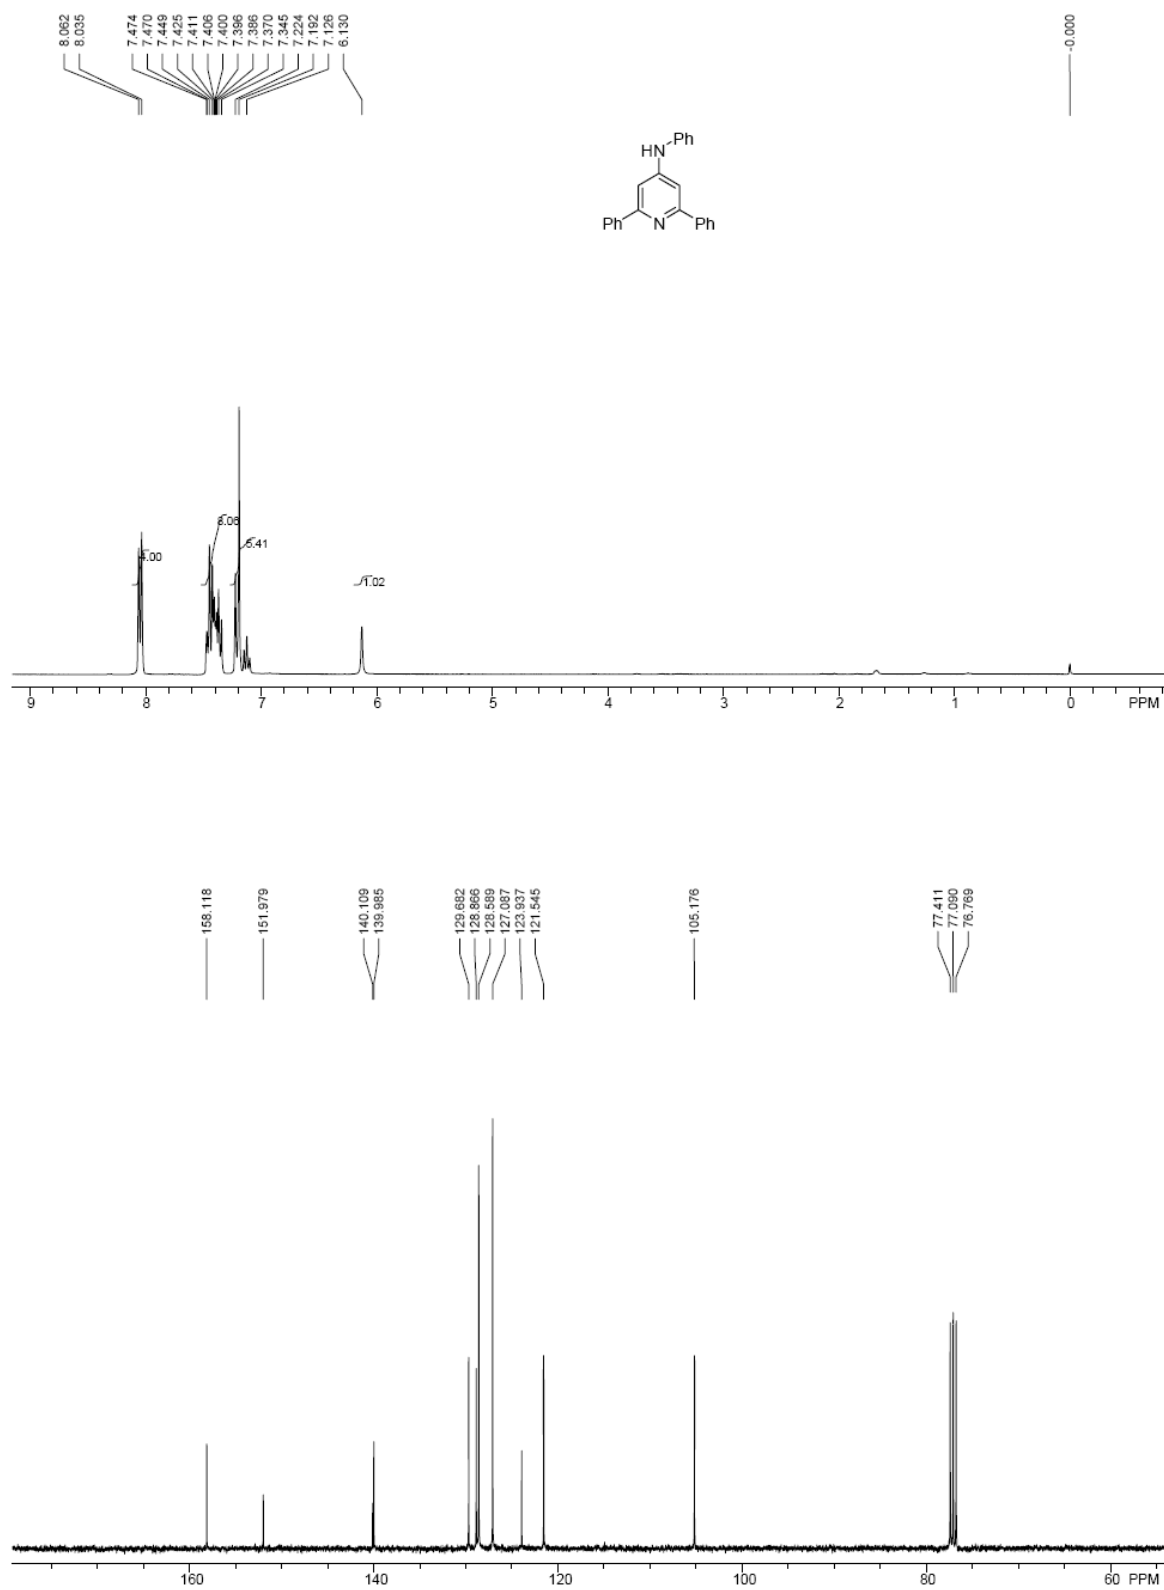

30

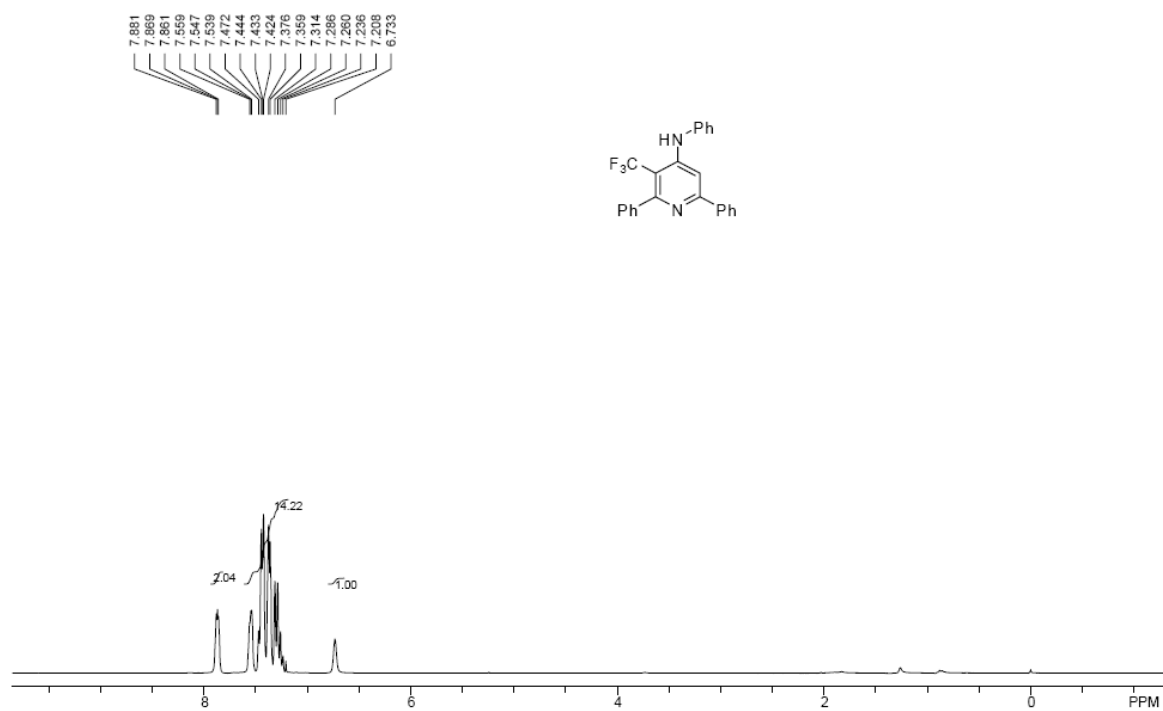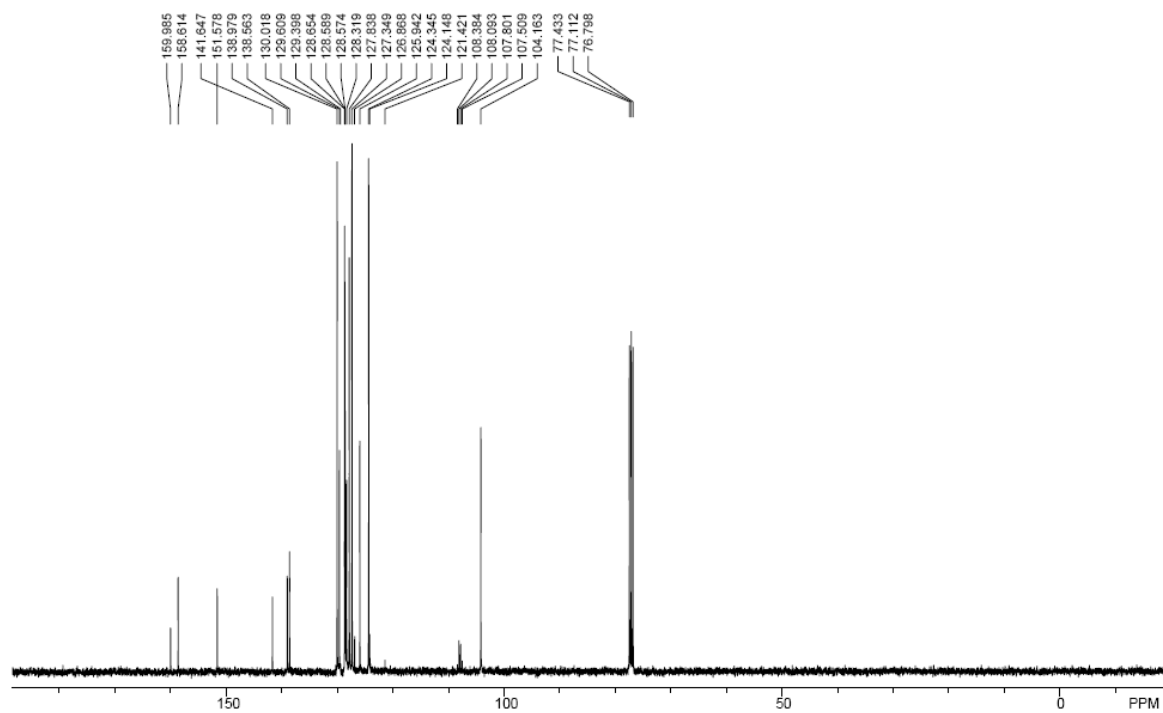



3p

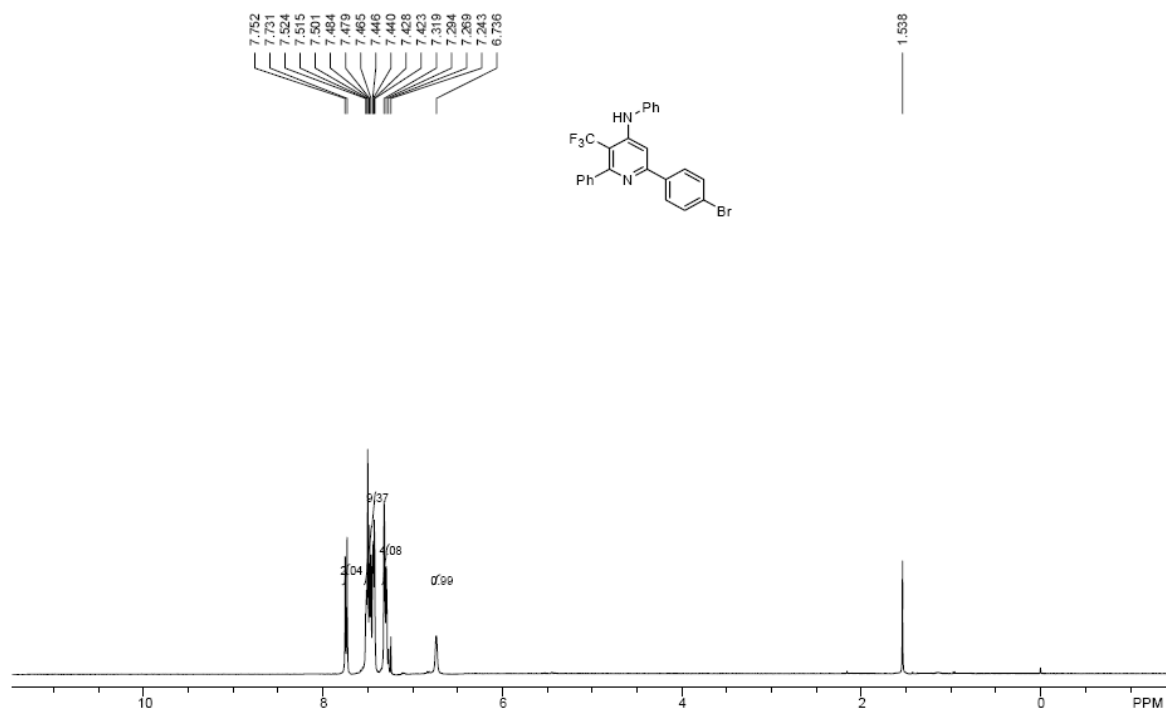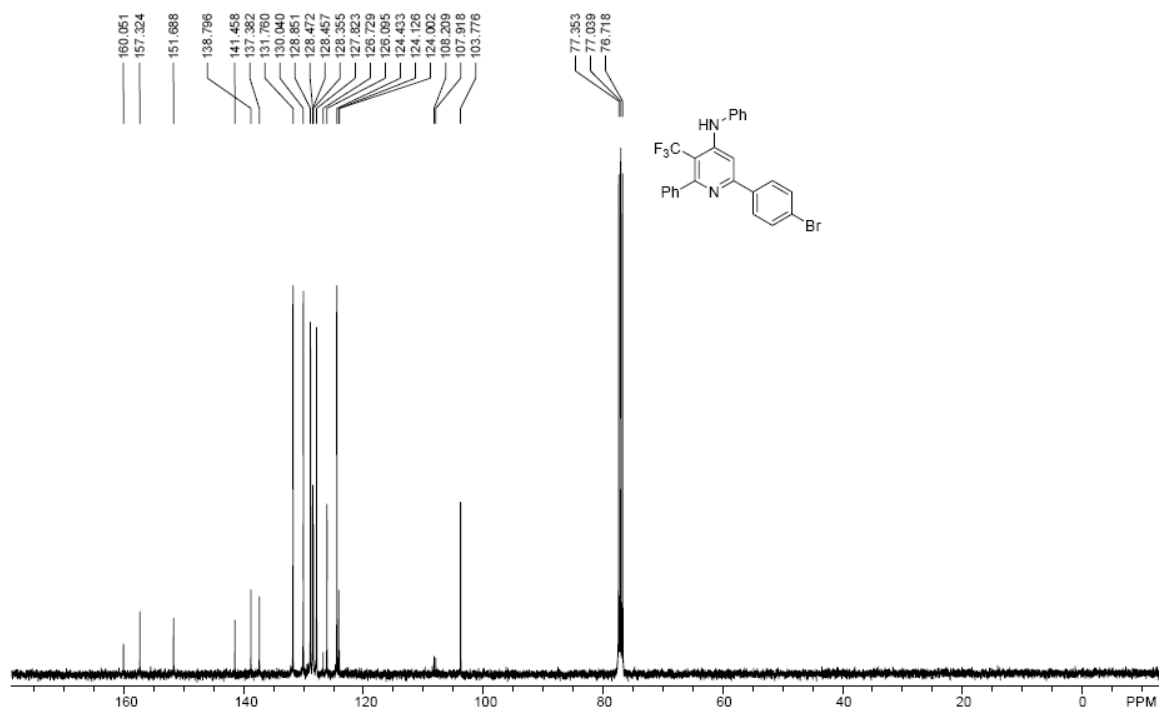

3q

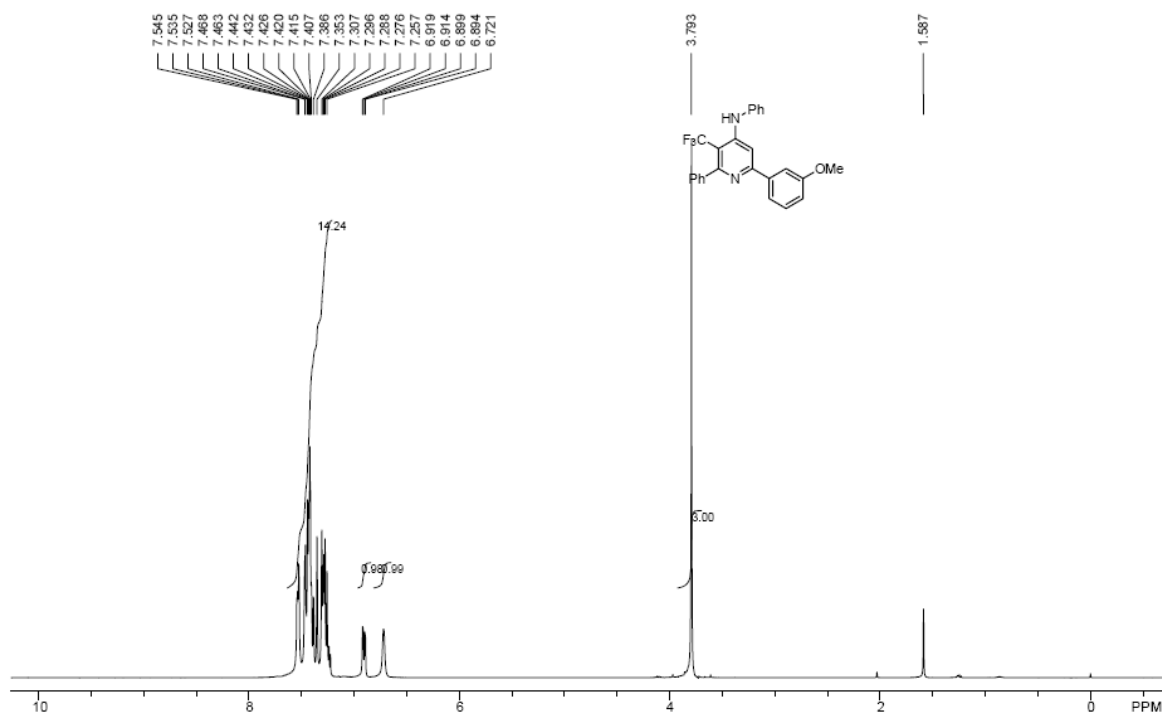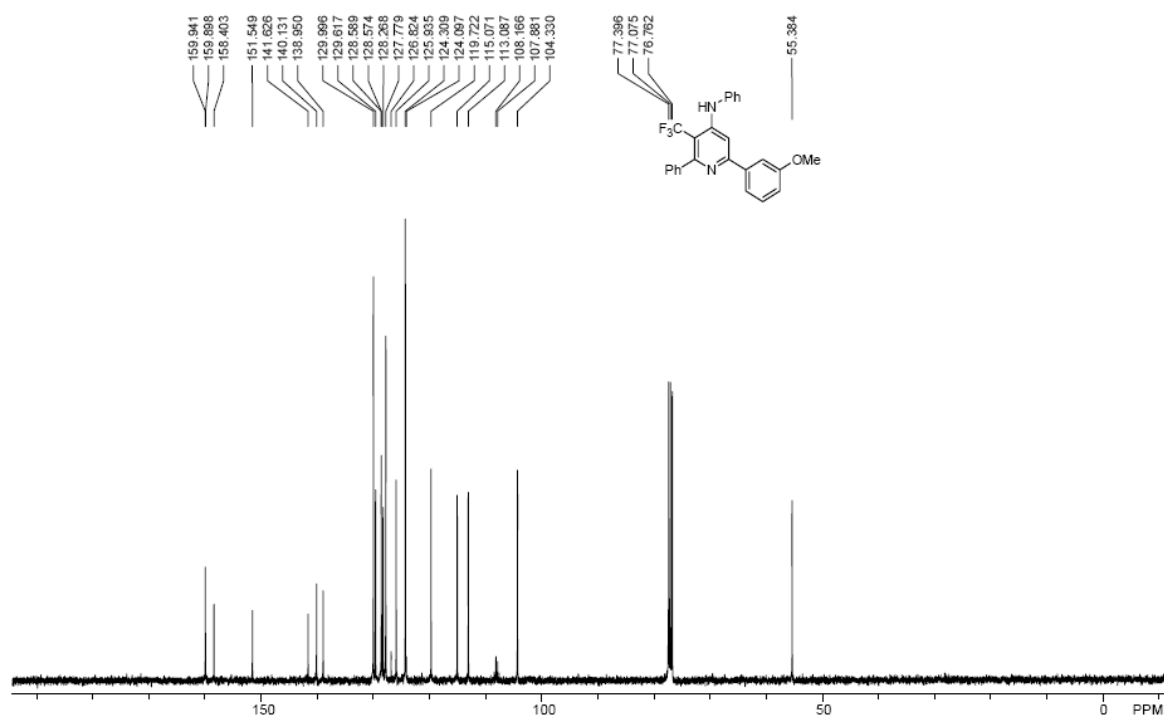

3r

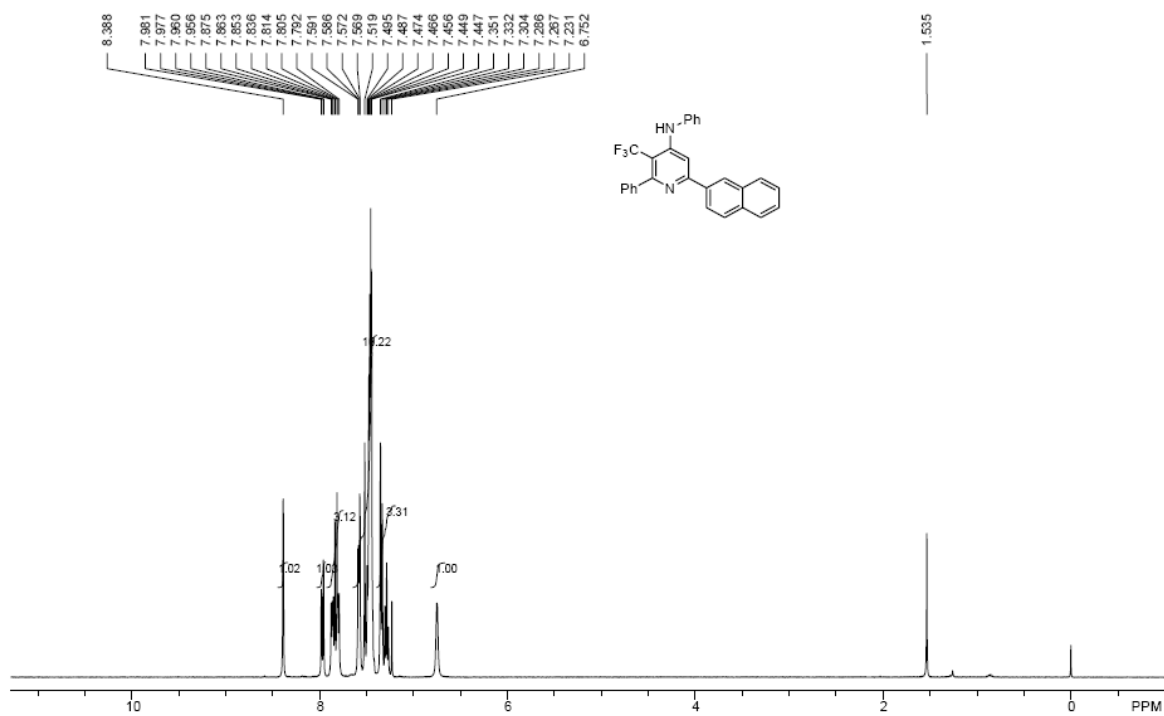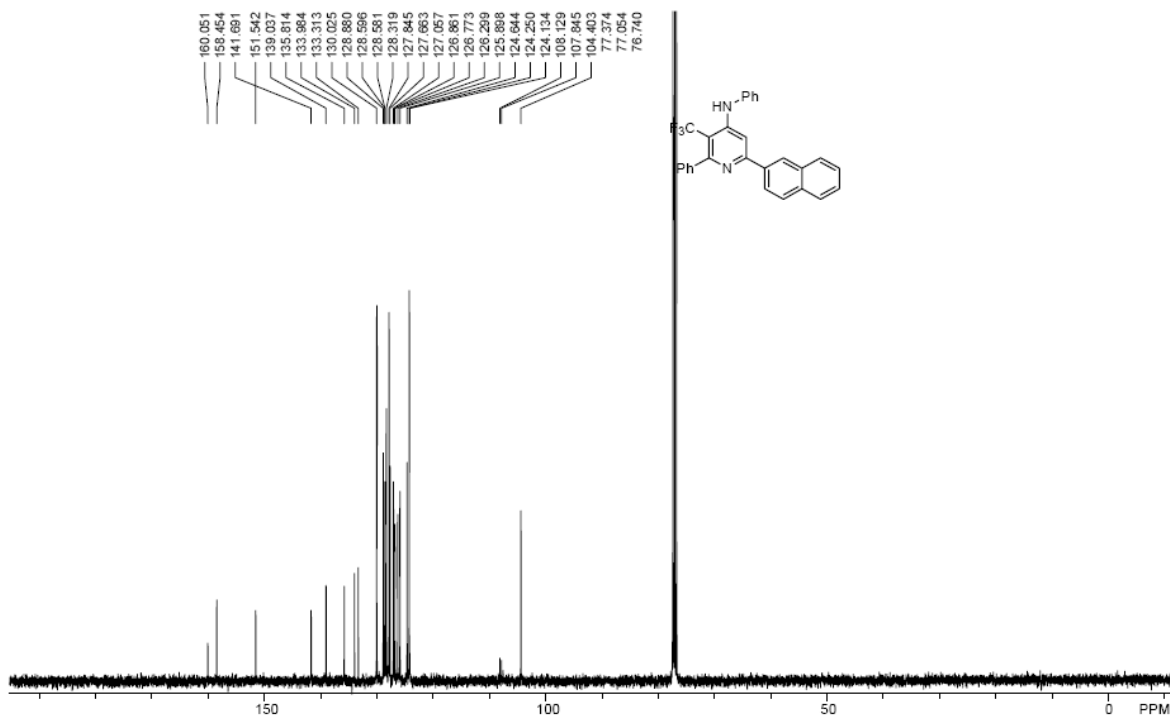

3s

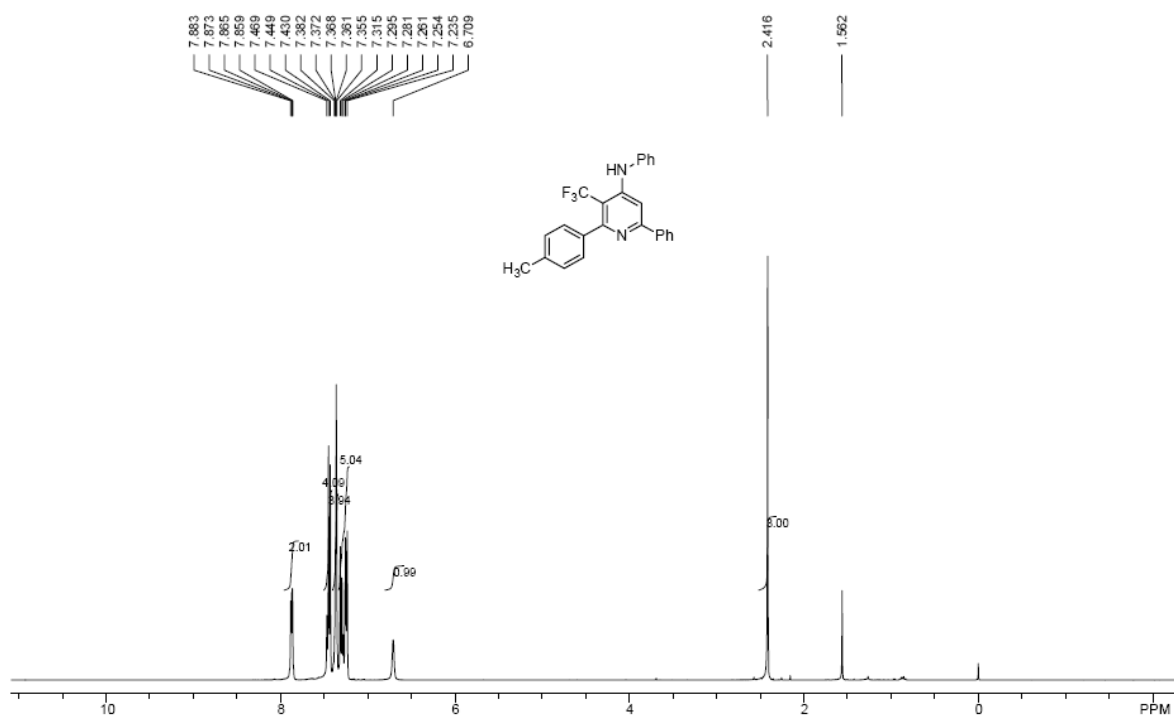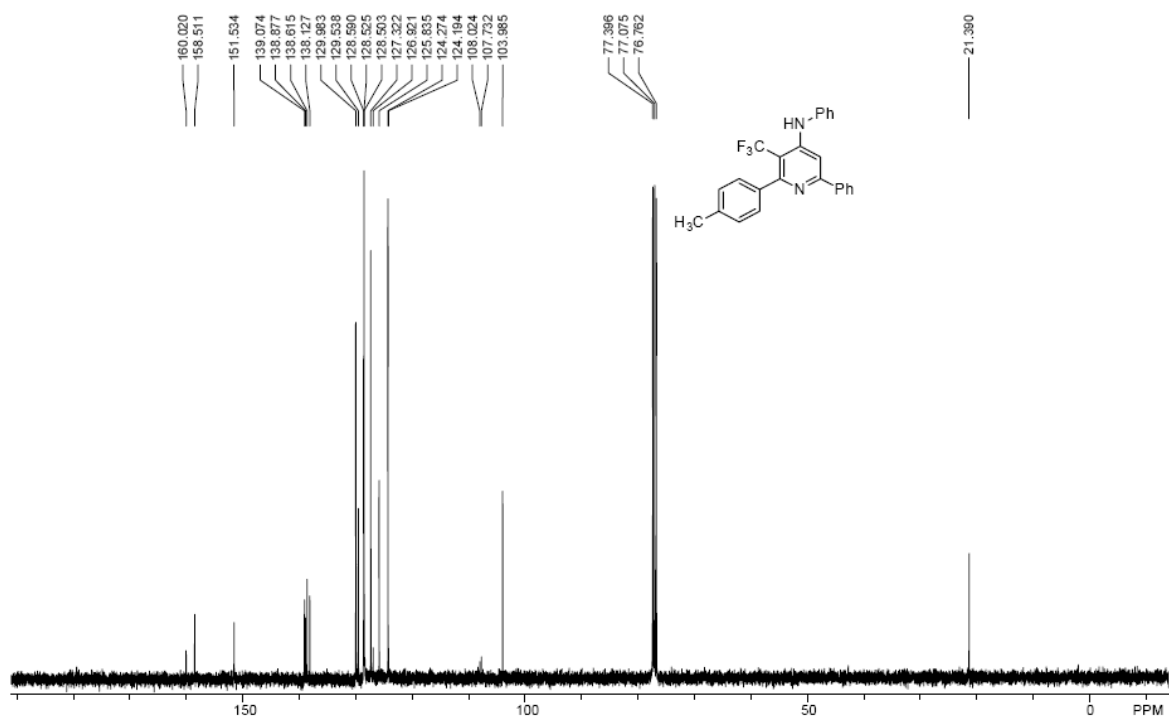

3t

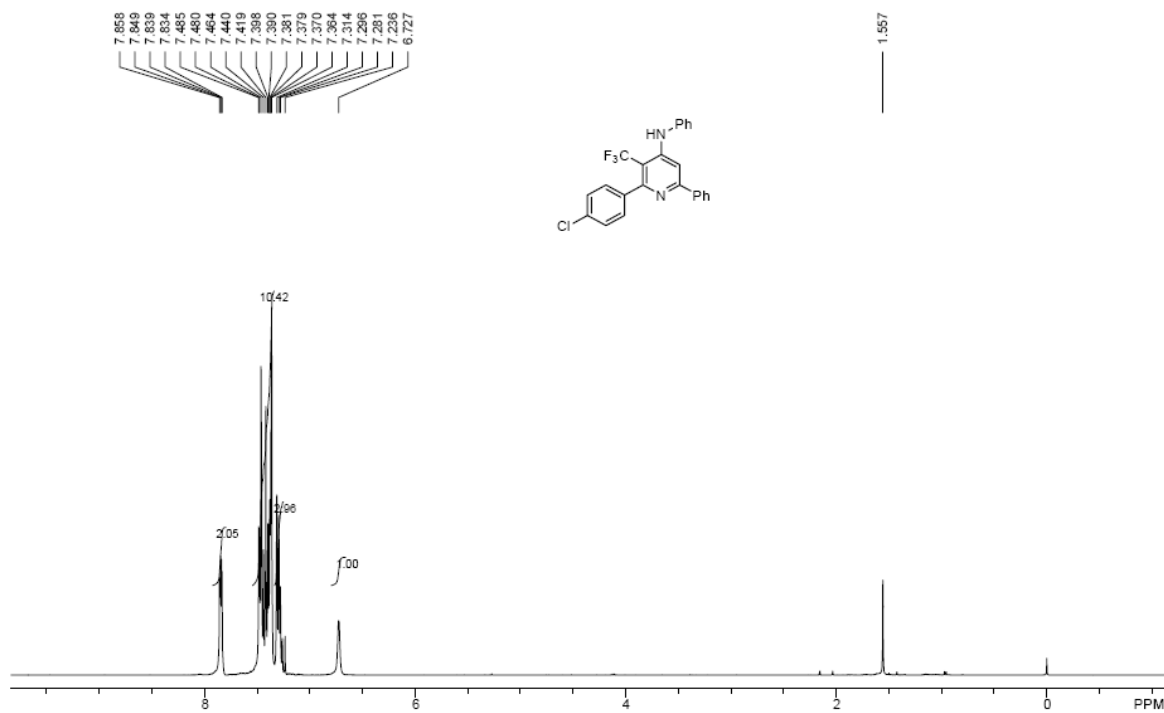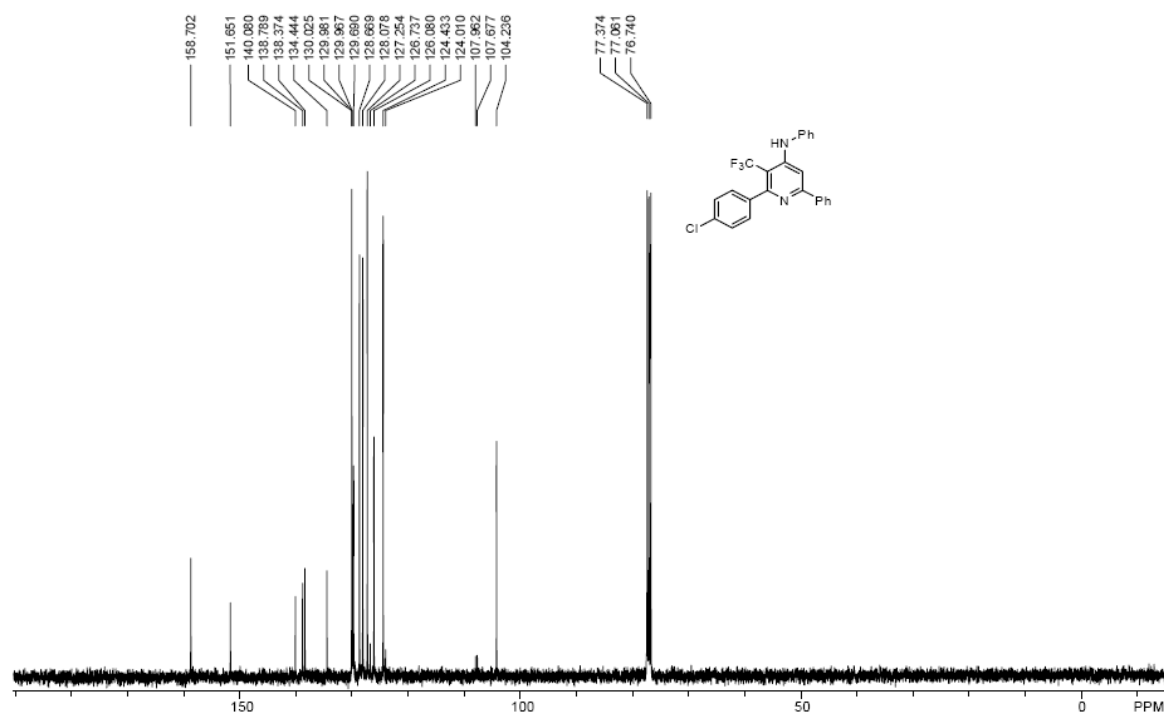

3u

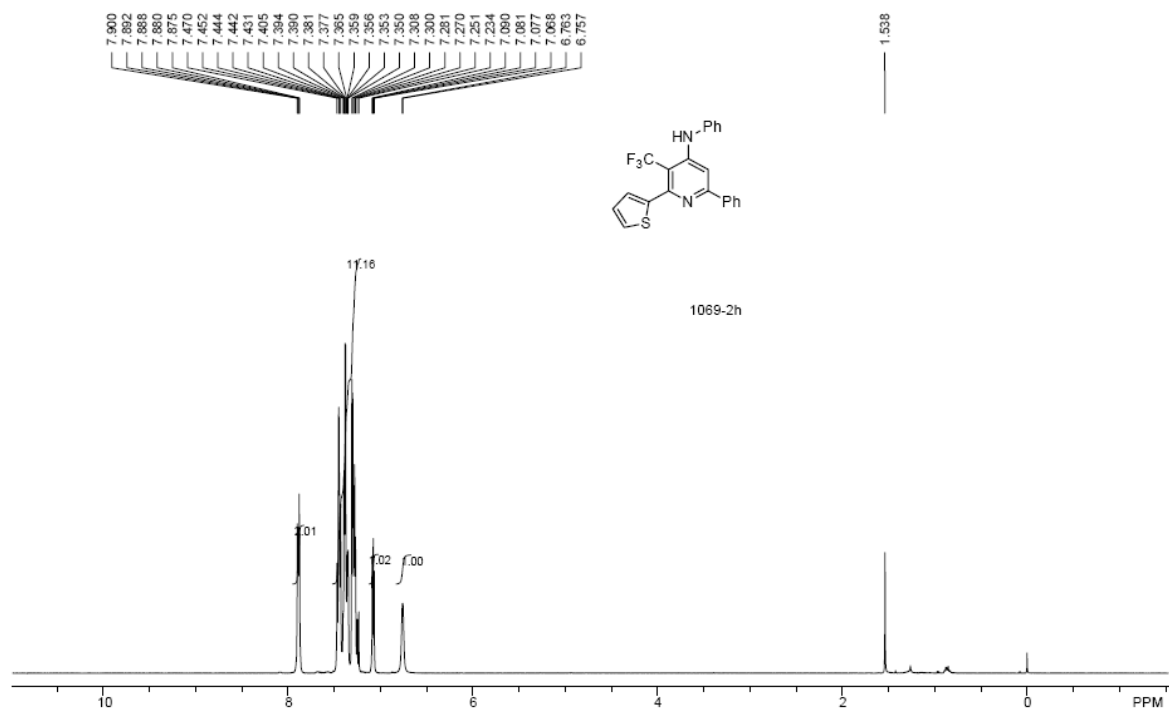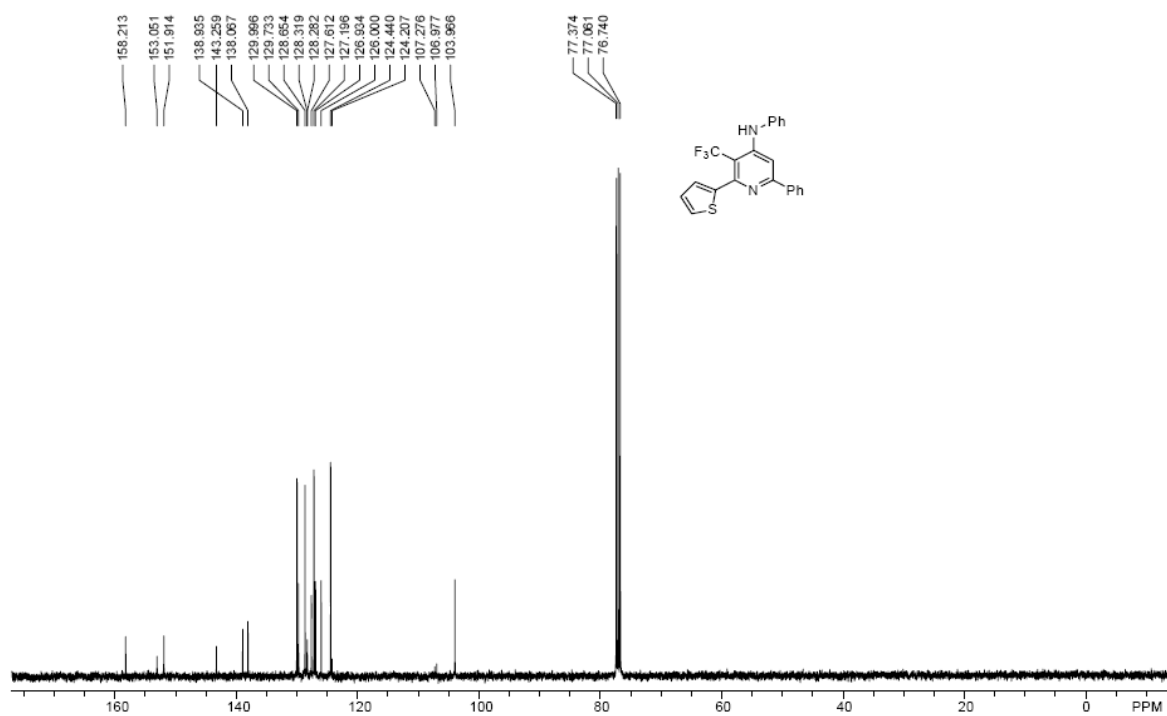

3v

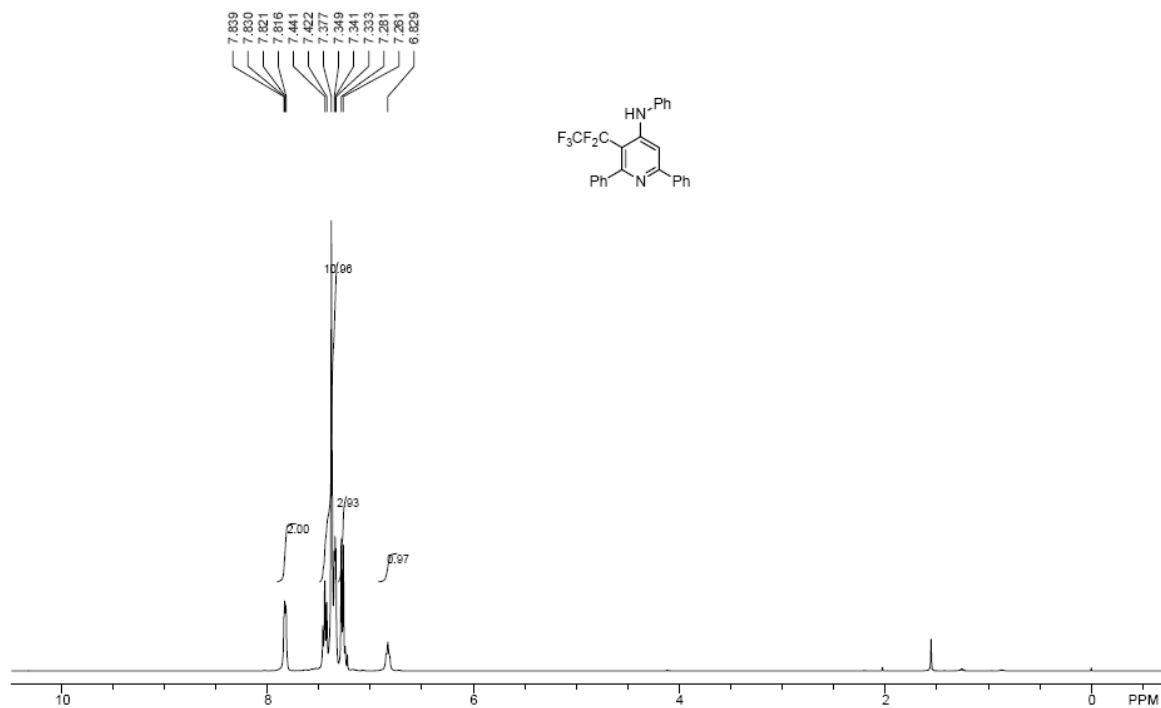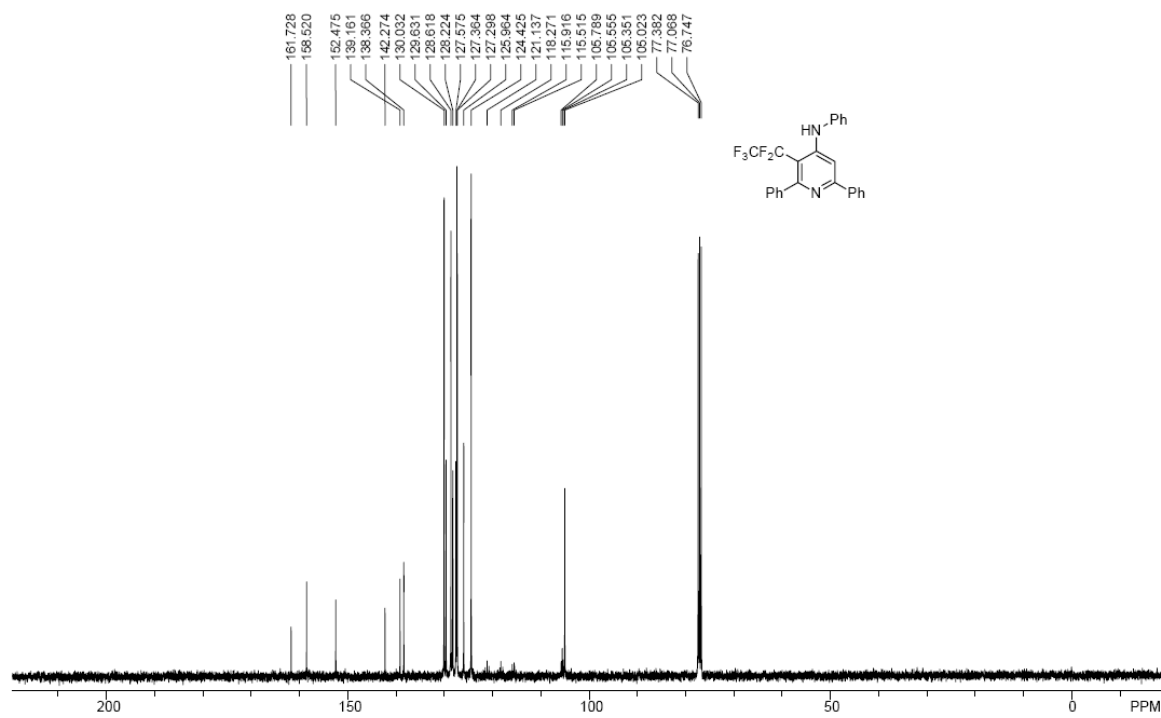

3w

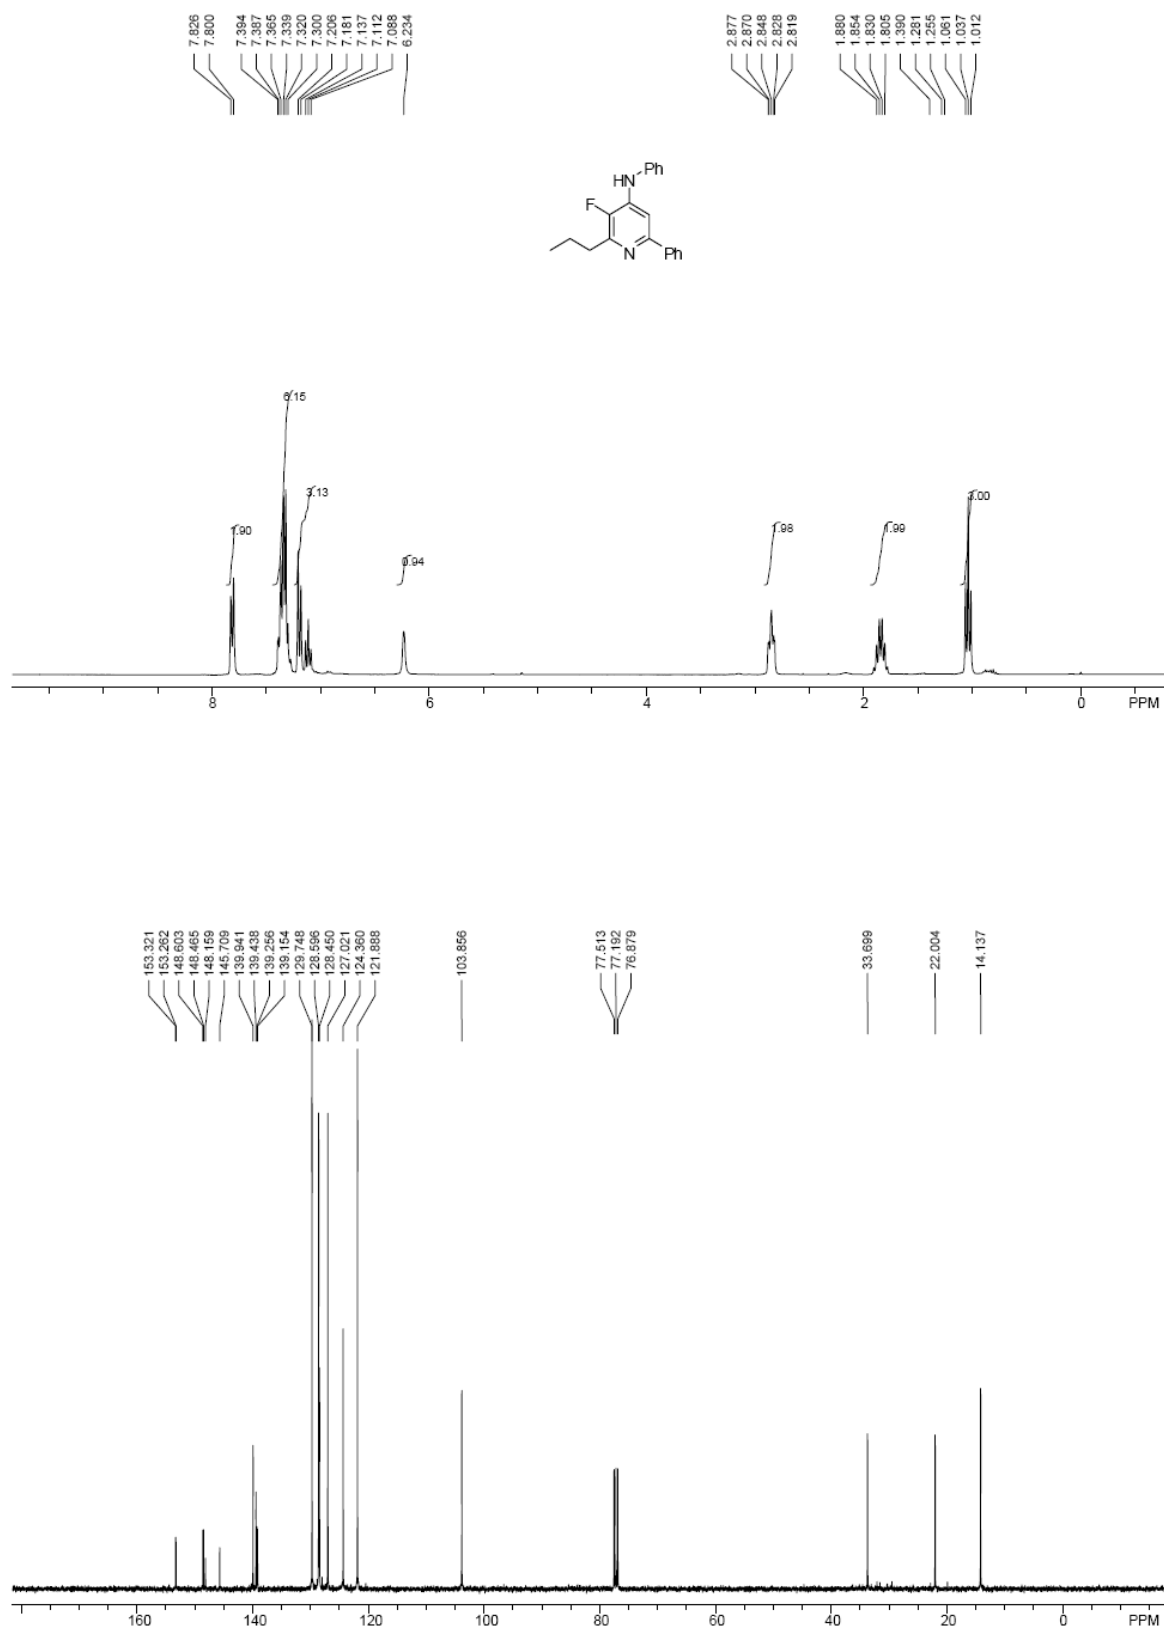



4a

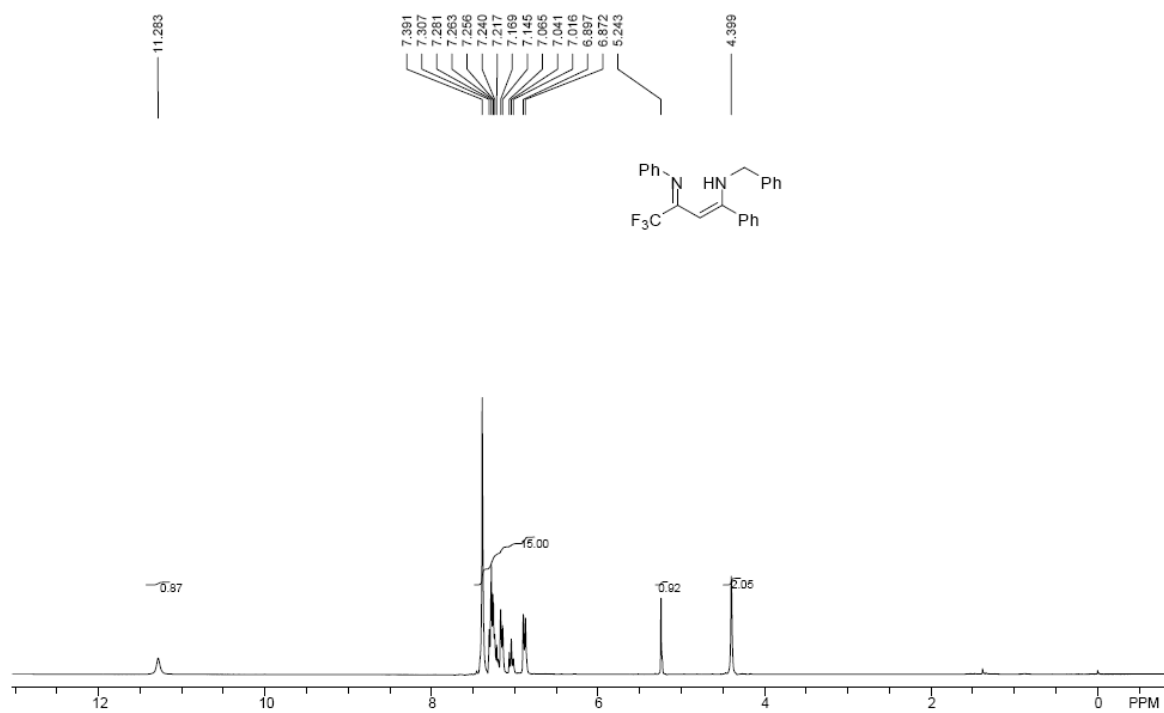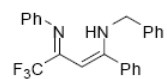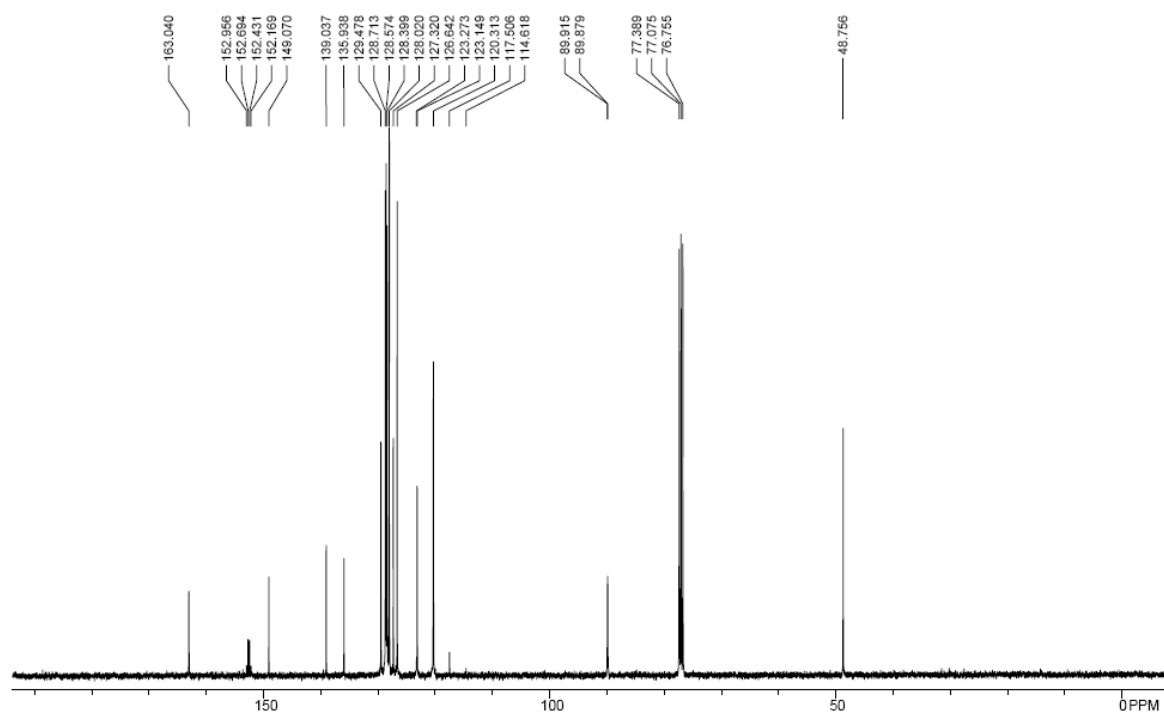

5a

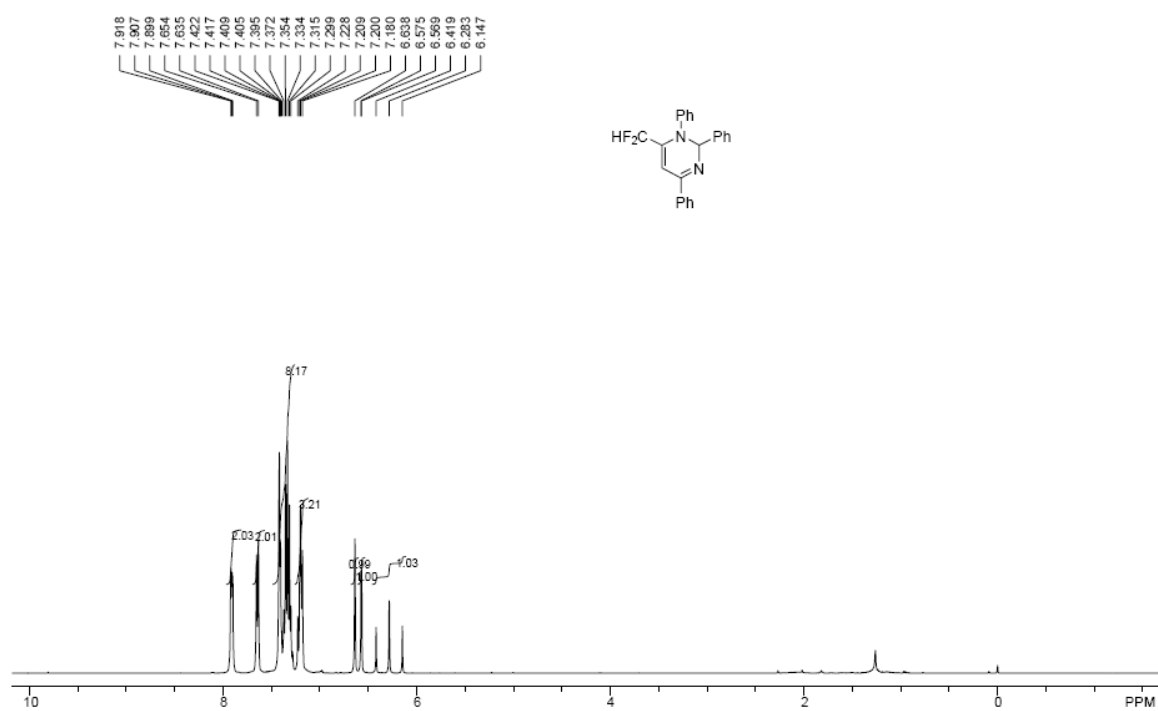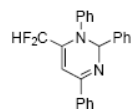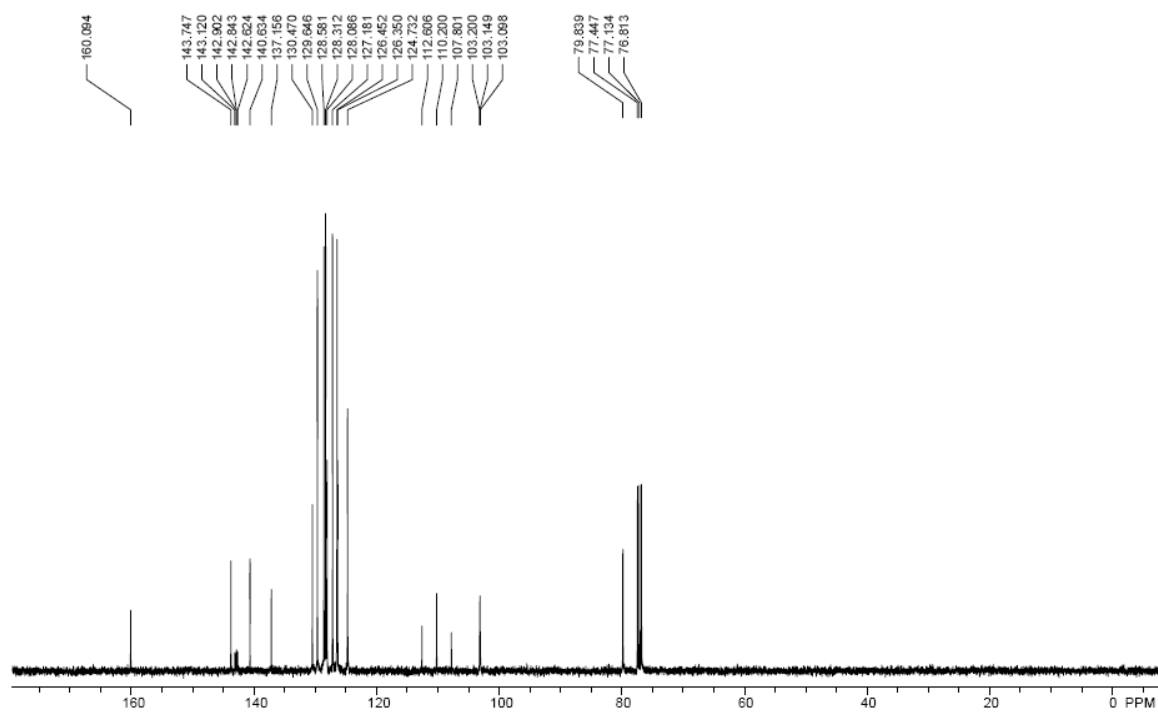

5b

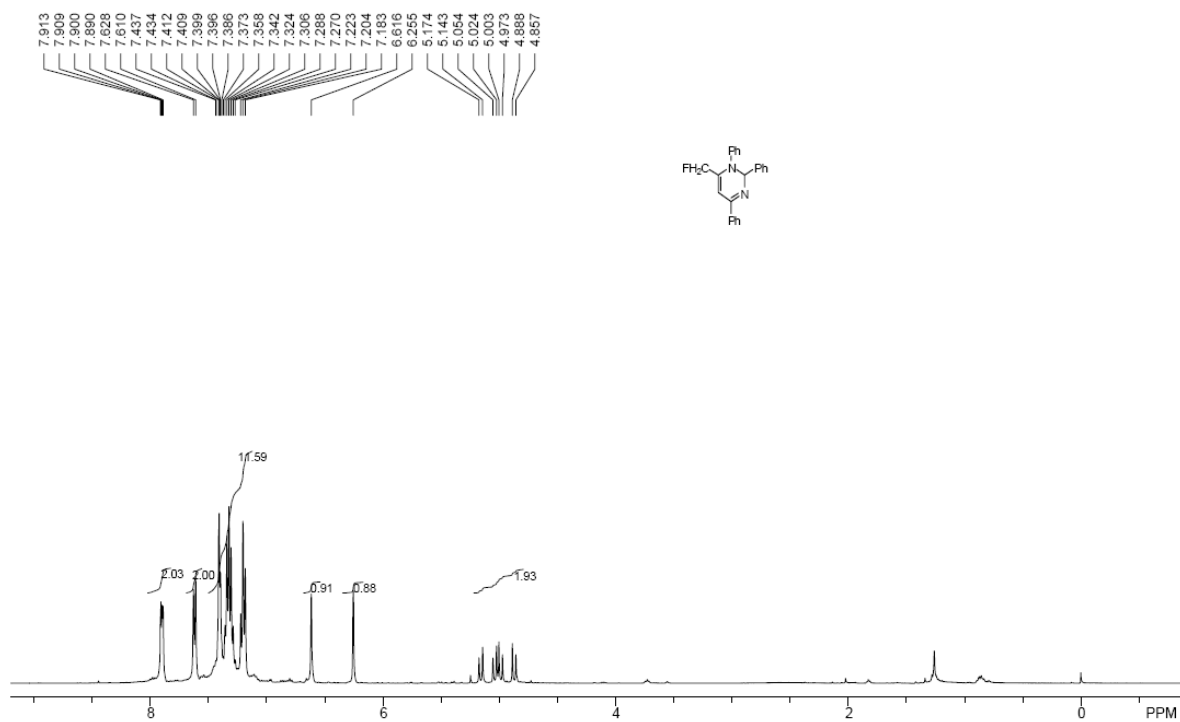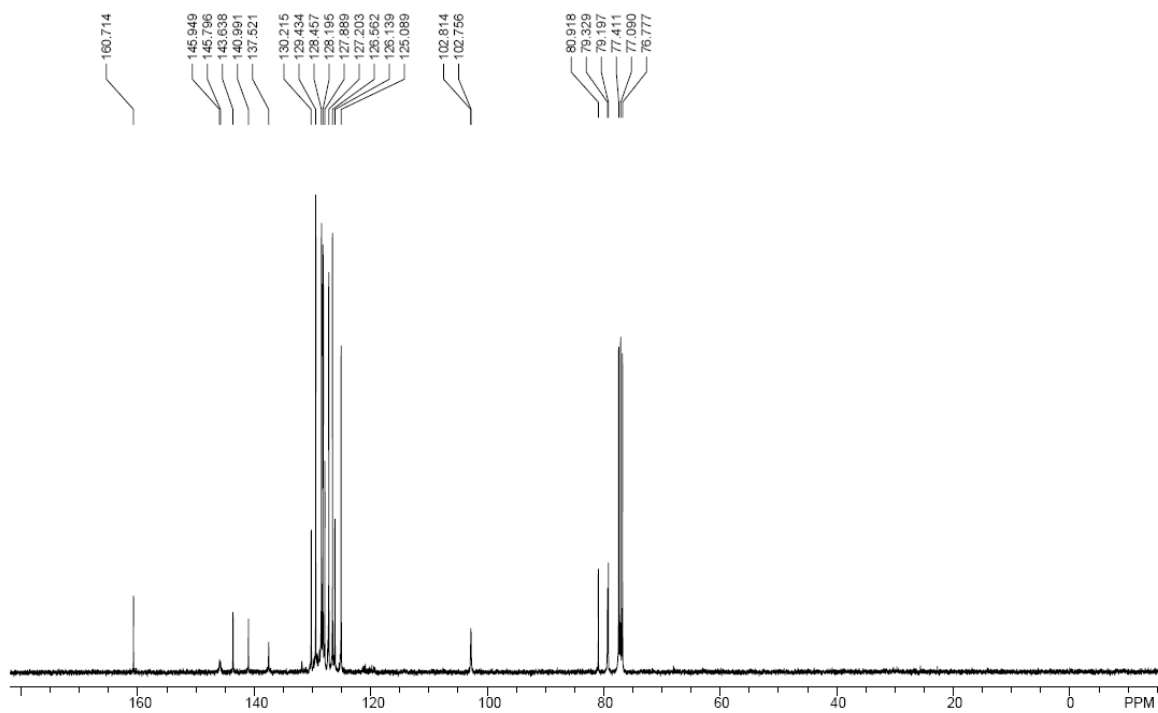

5c

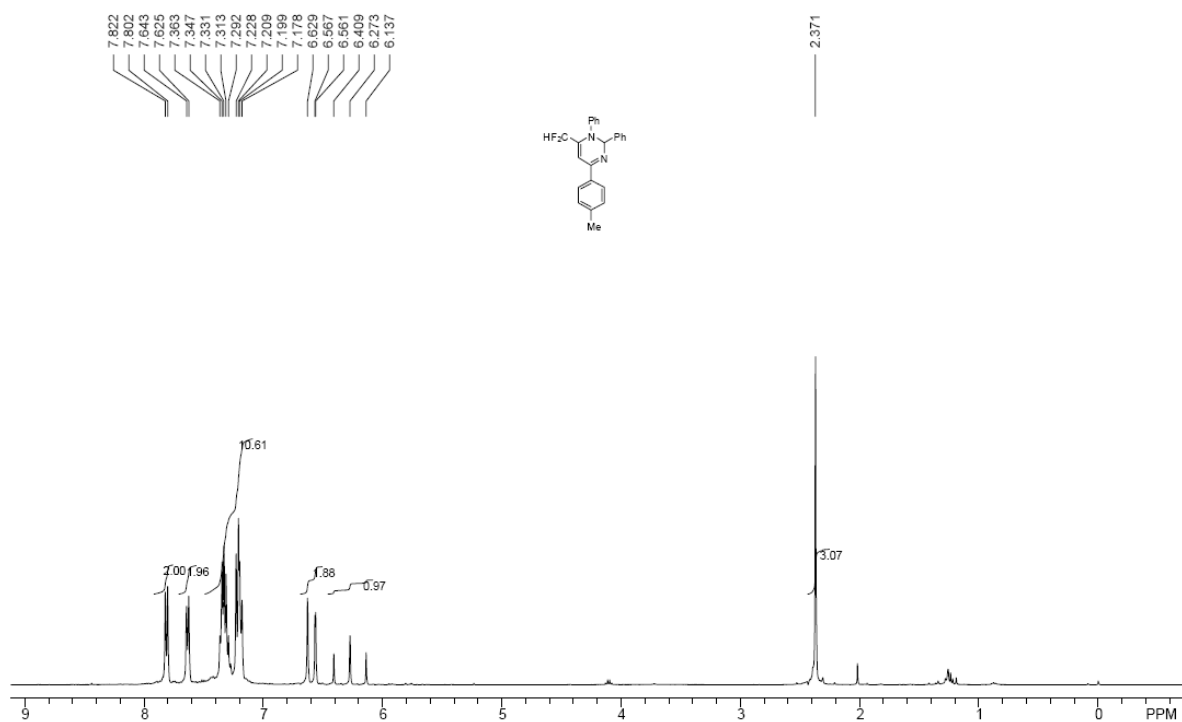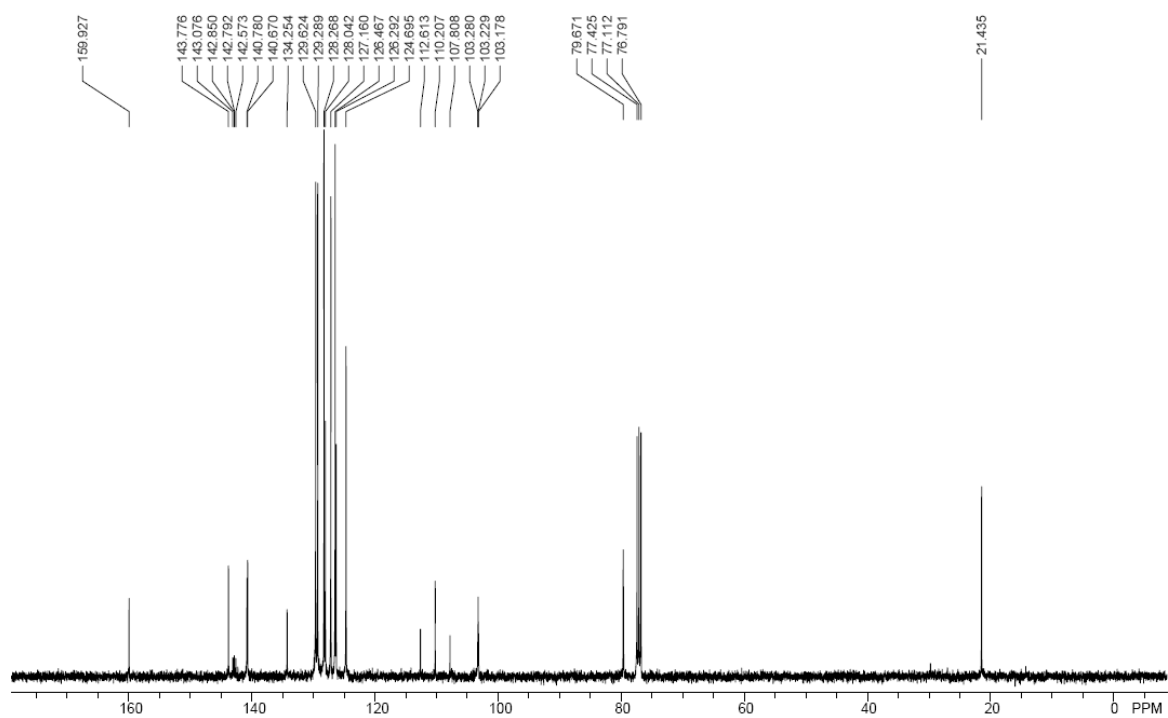

5d

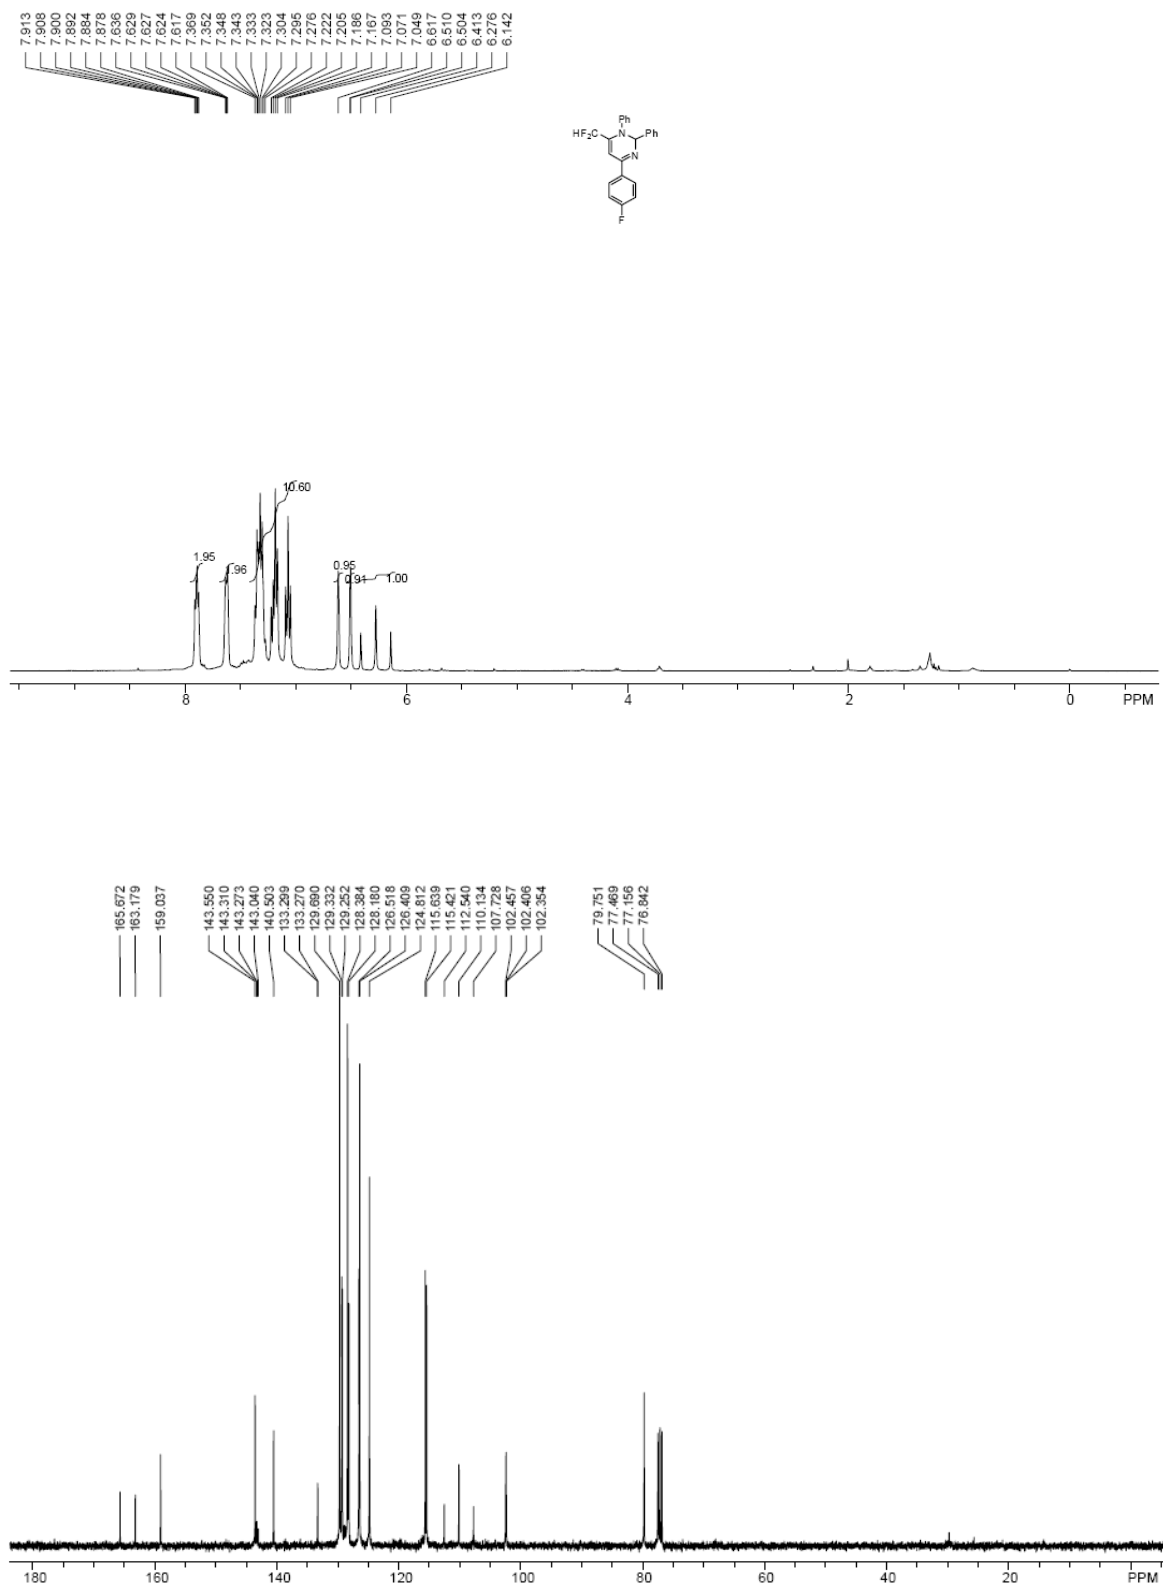

5e

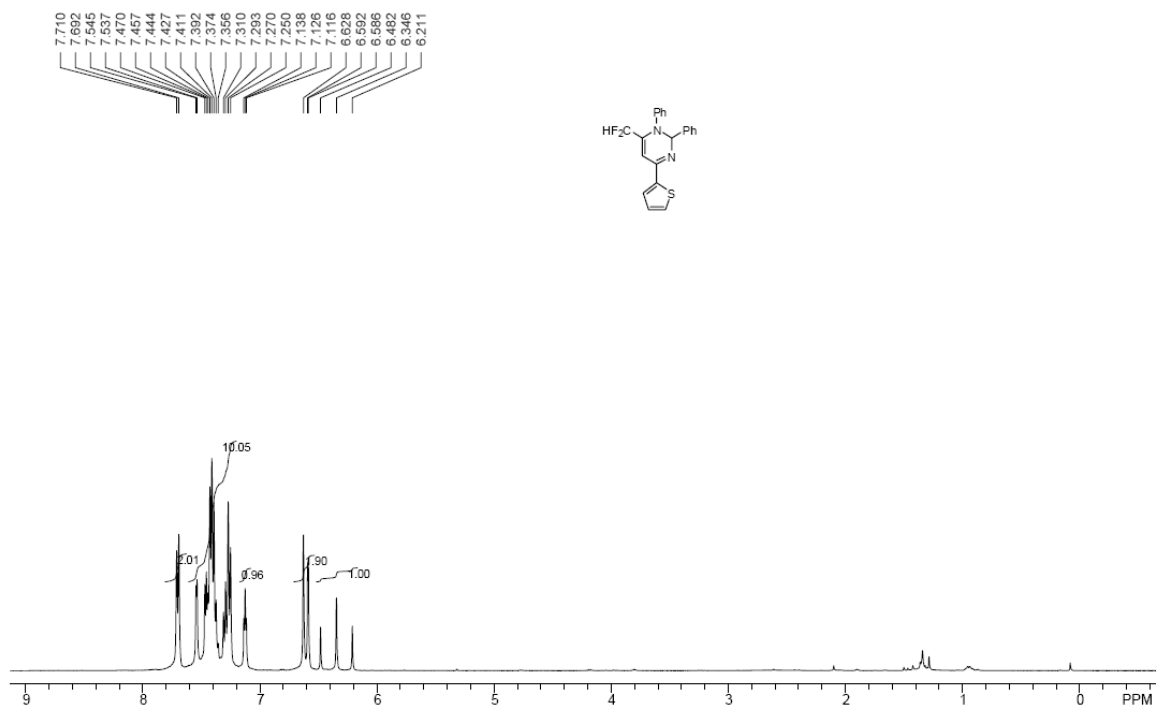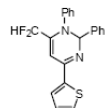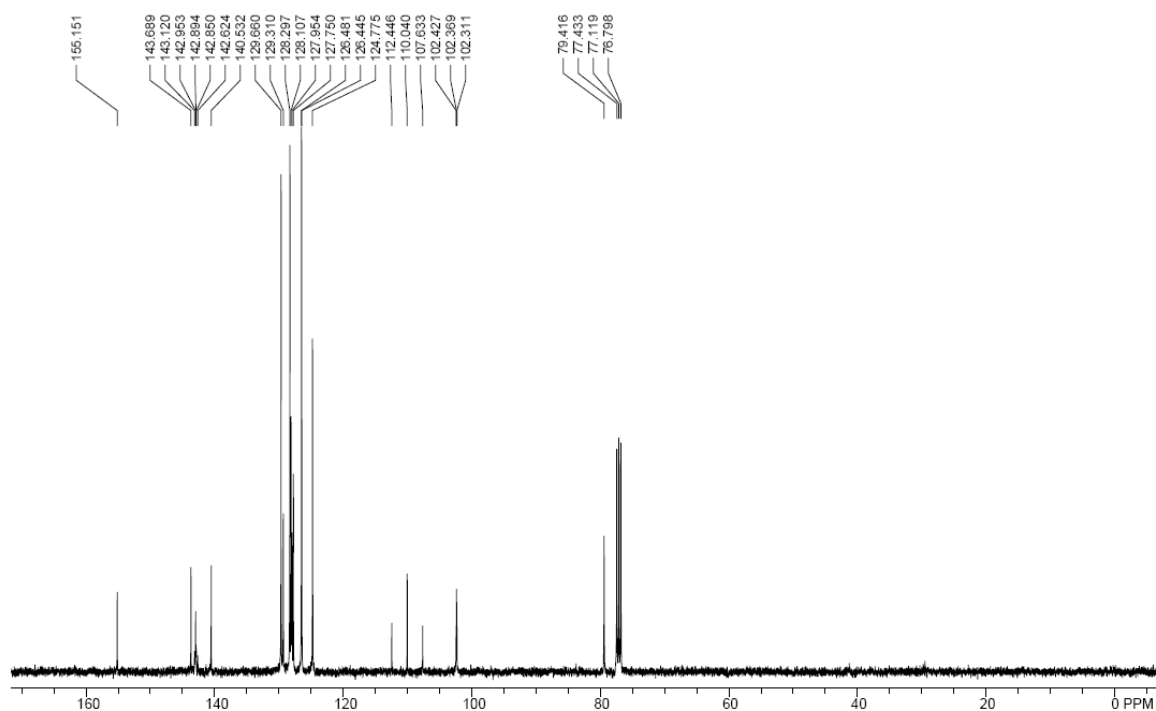

5f

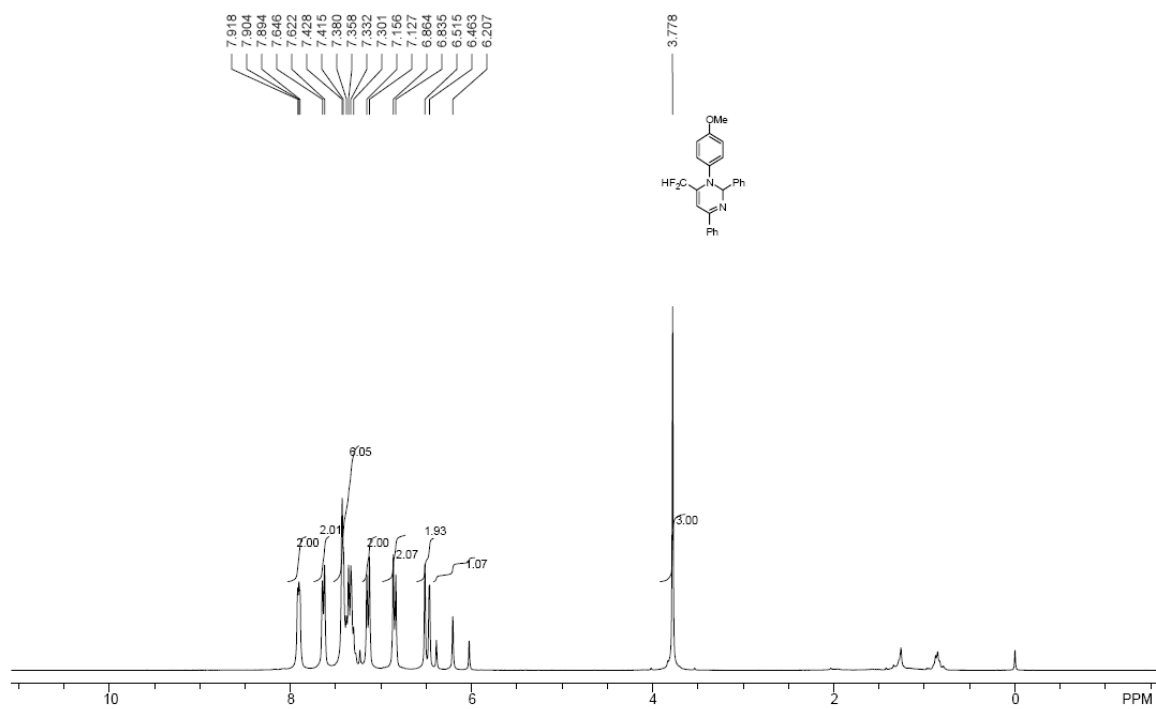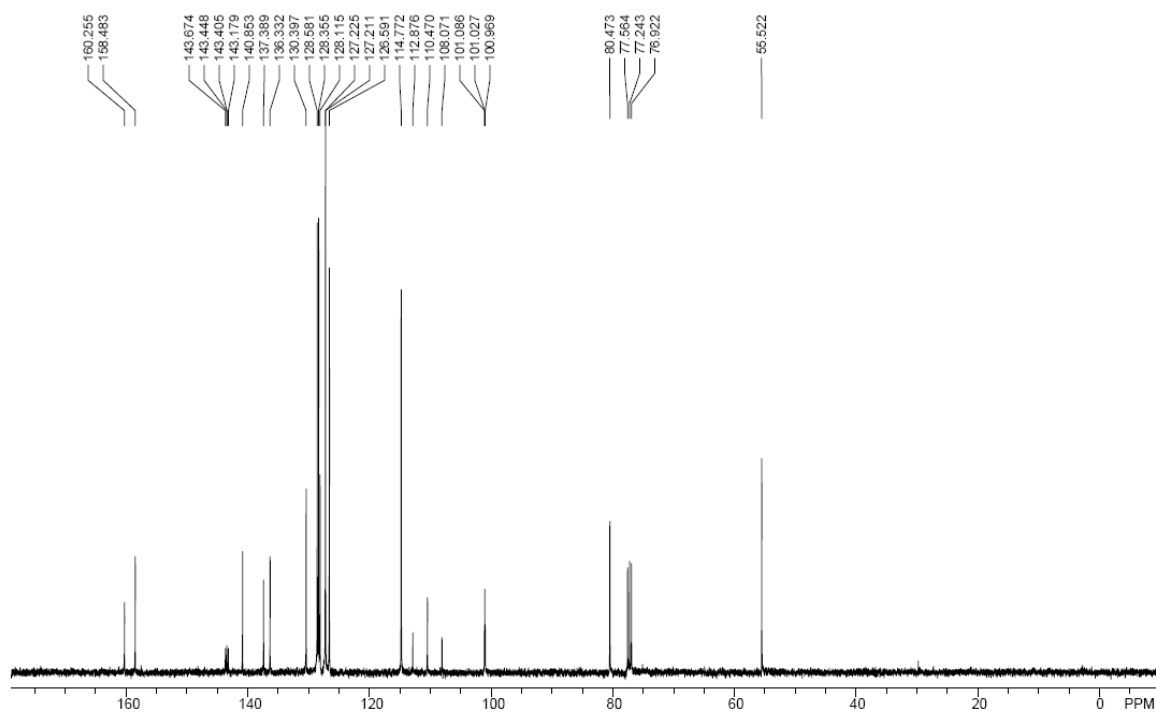

5g

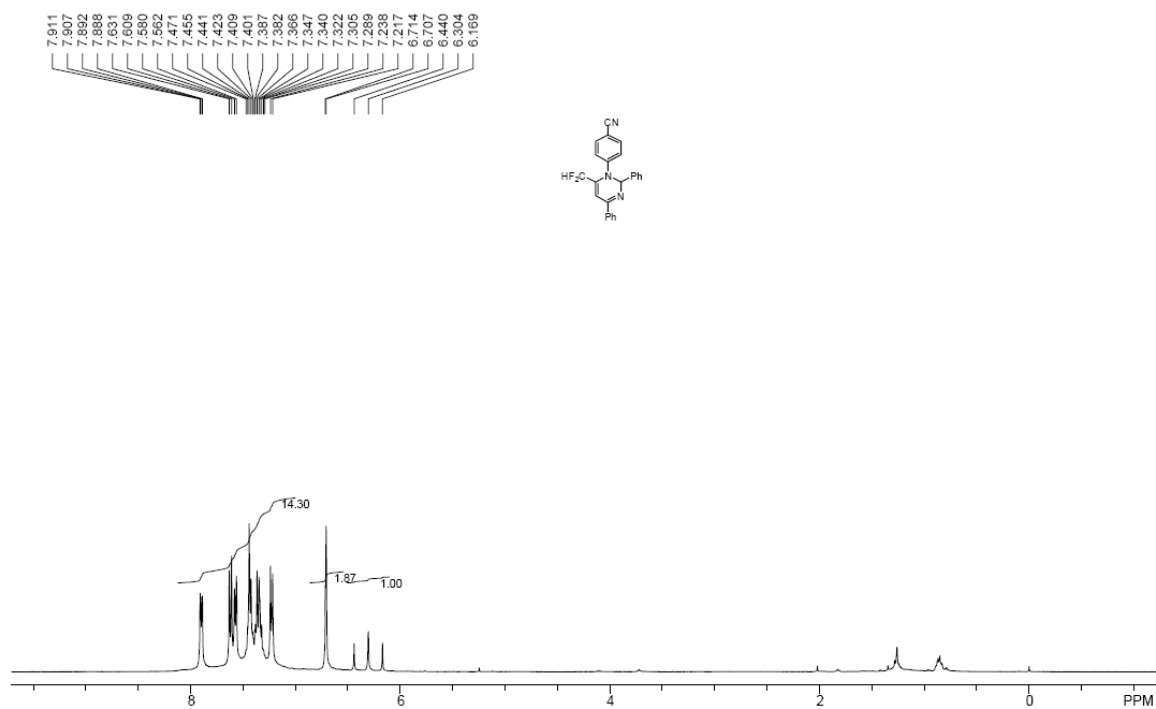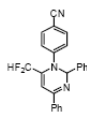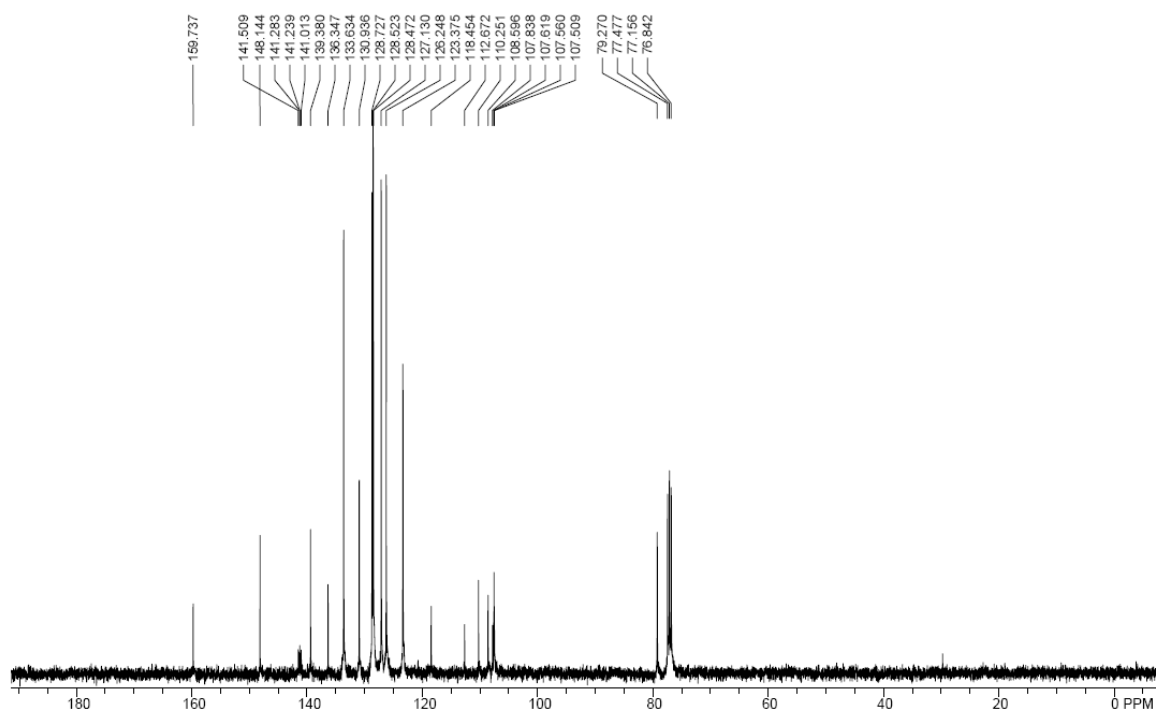



5h

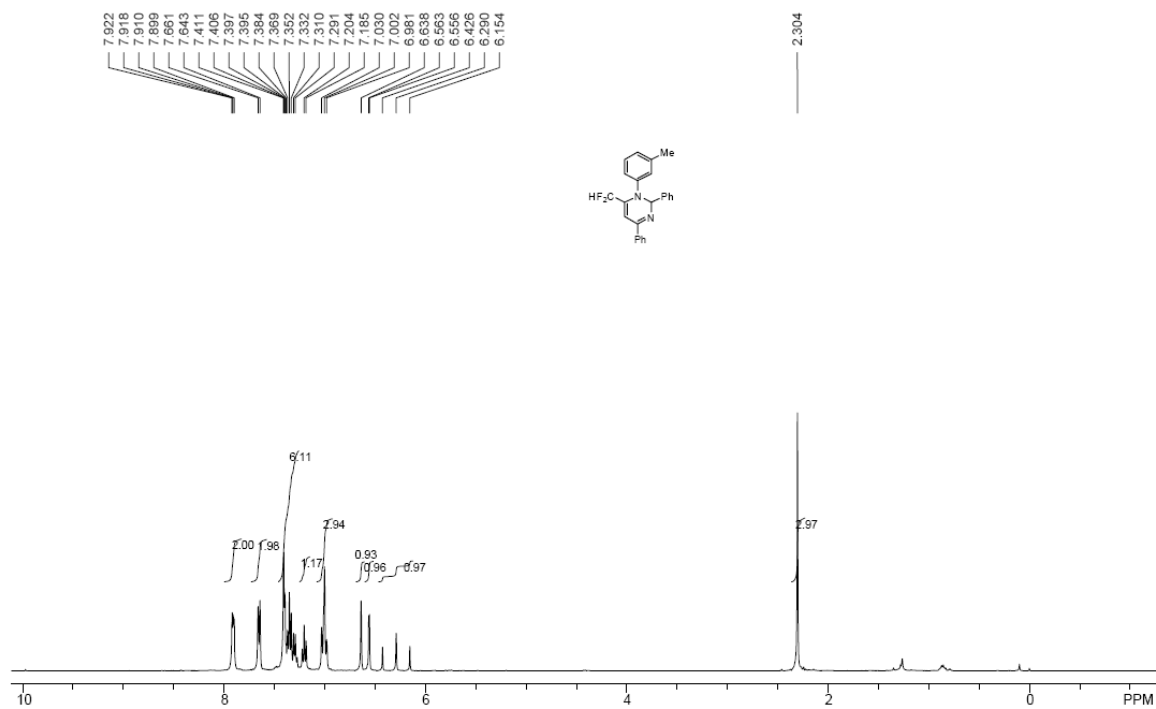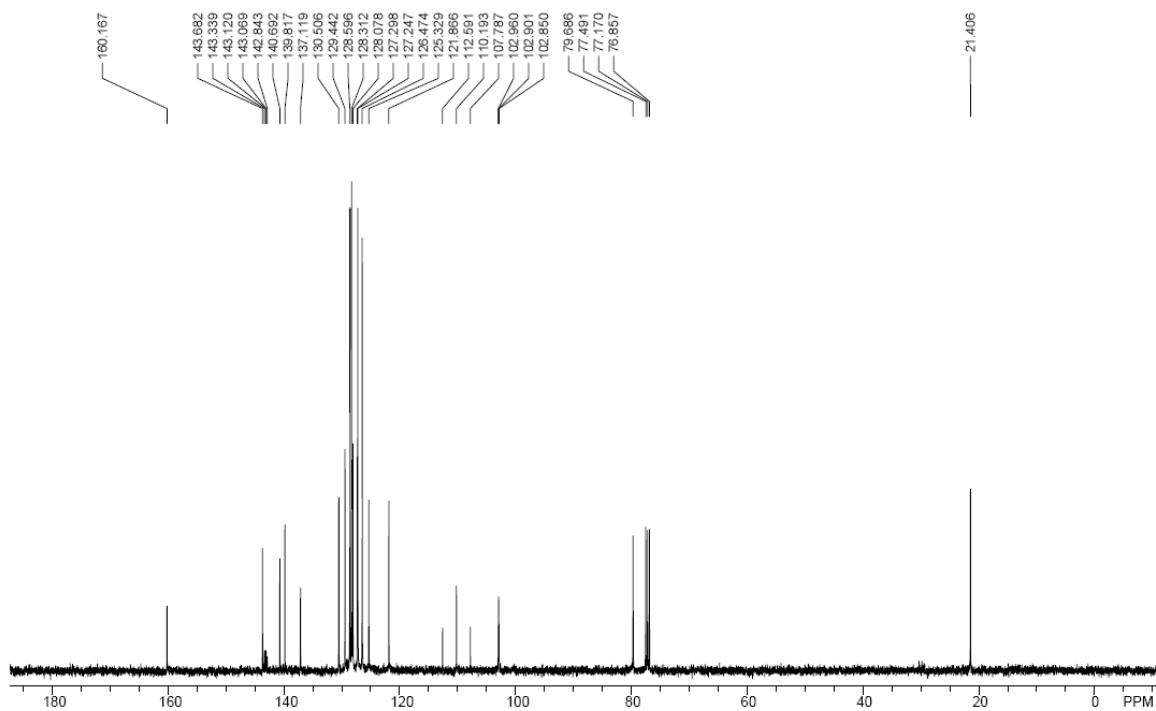

5i

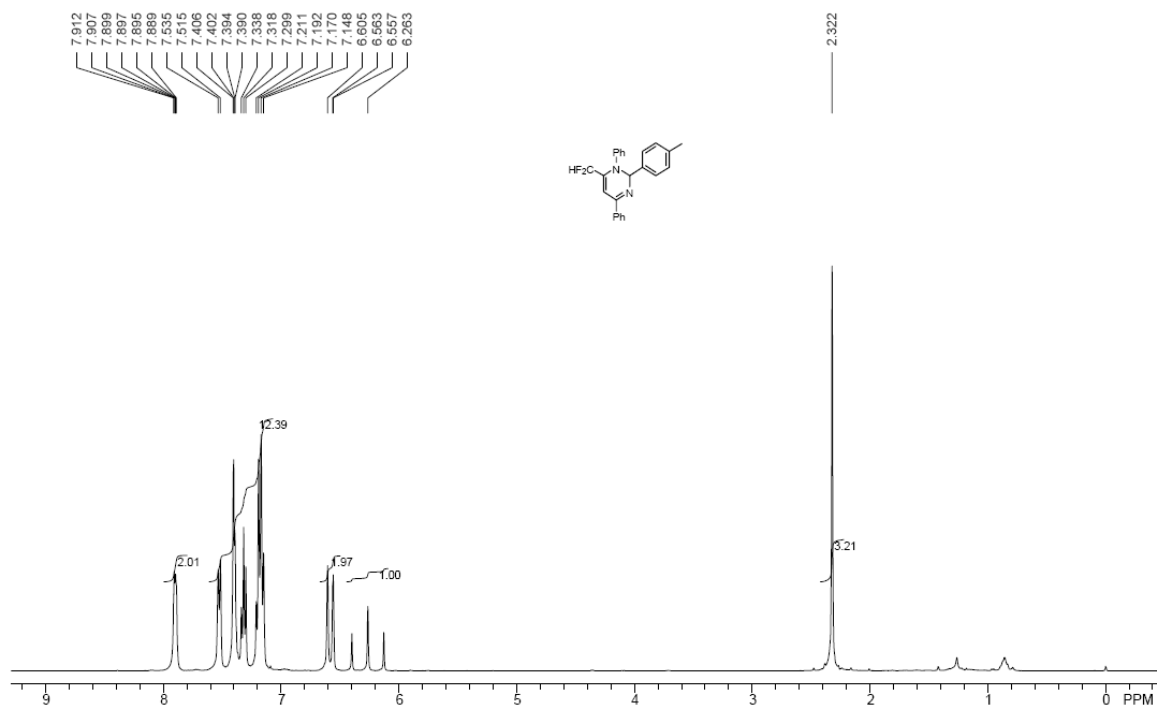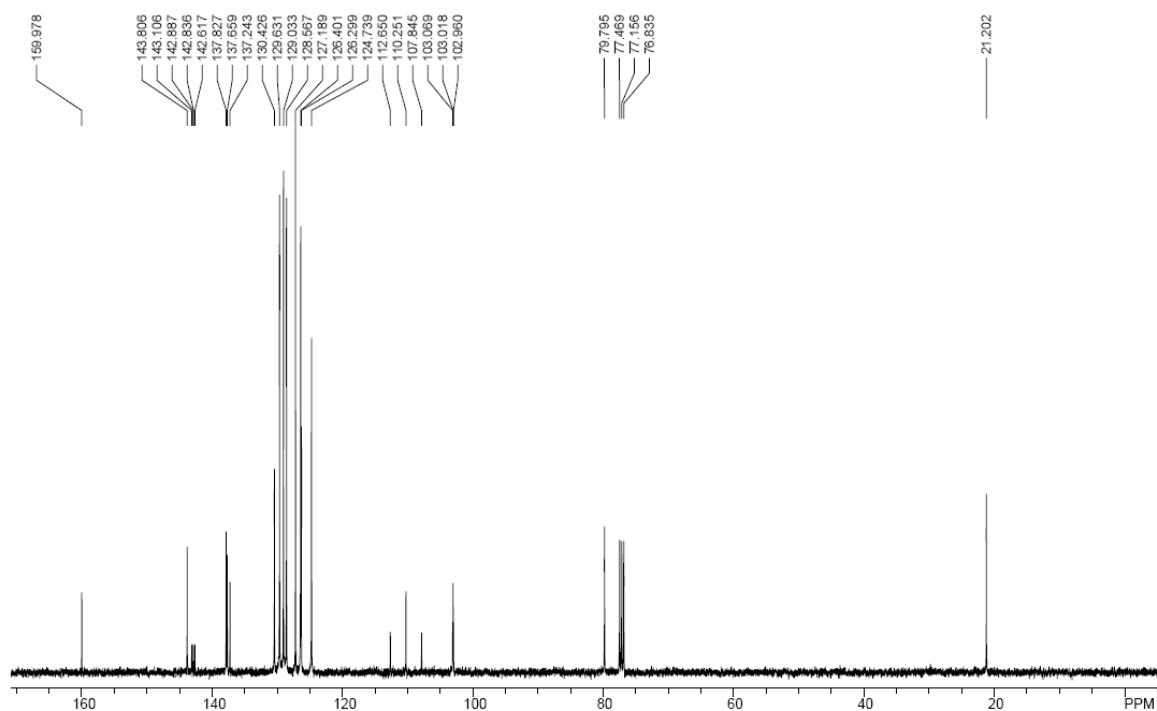

5j

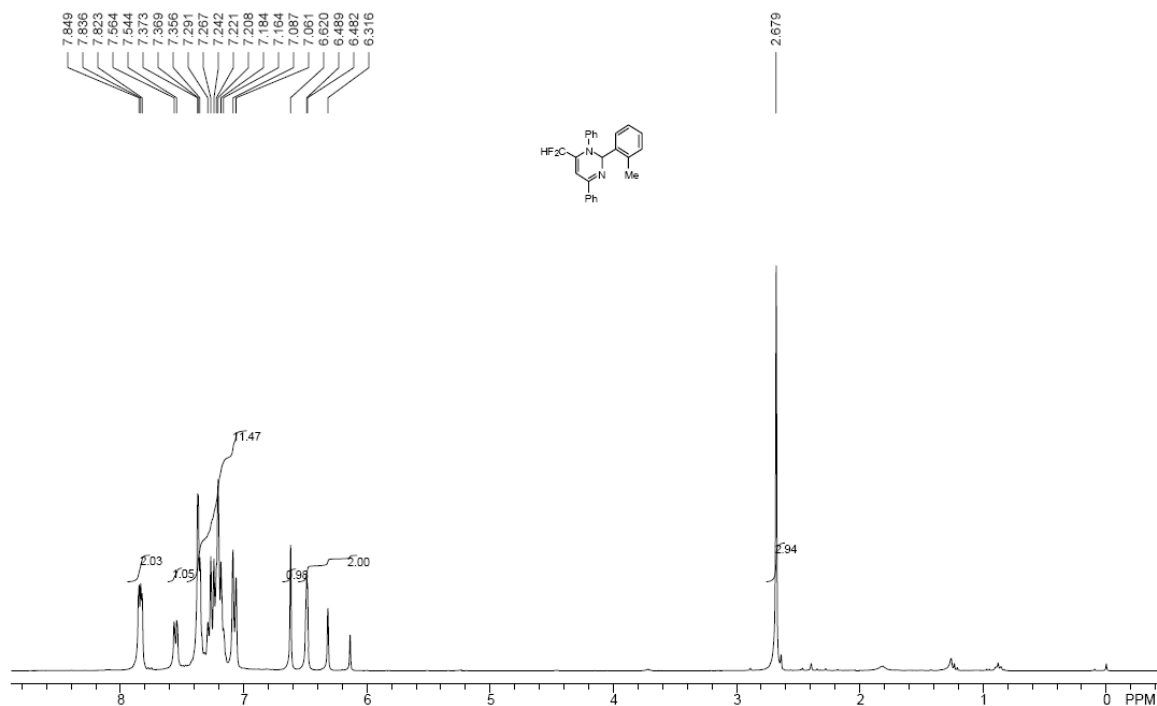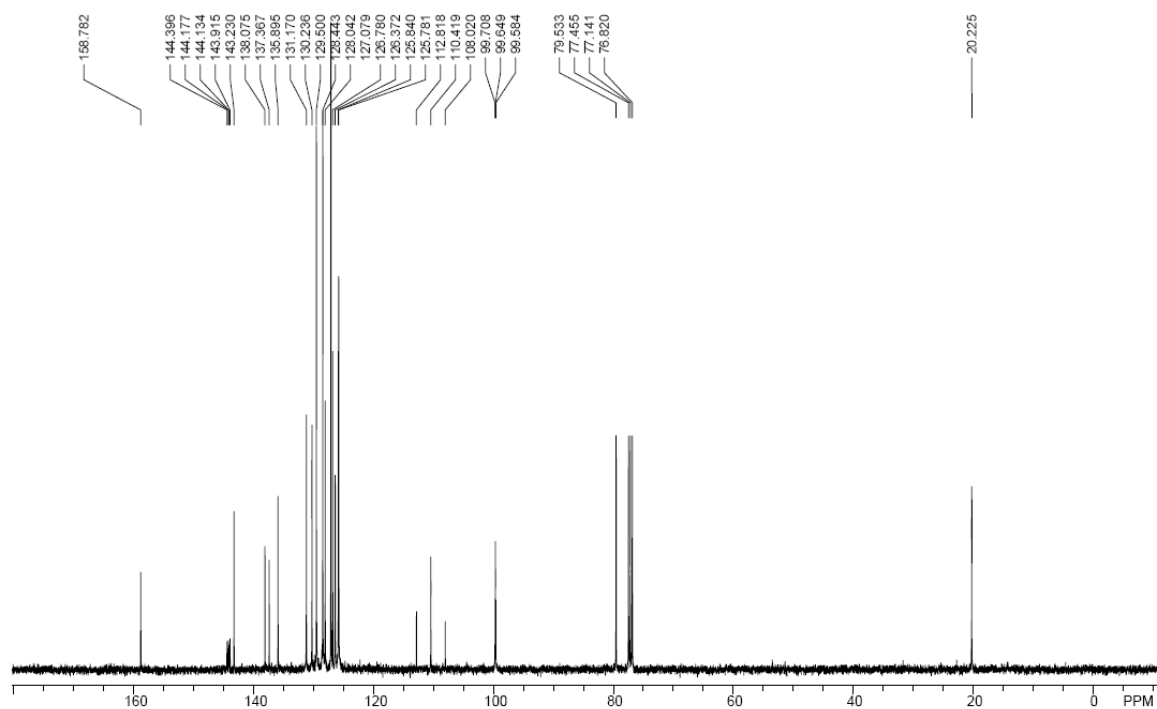

5k

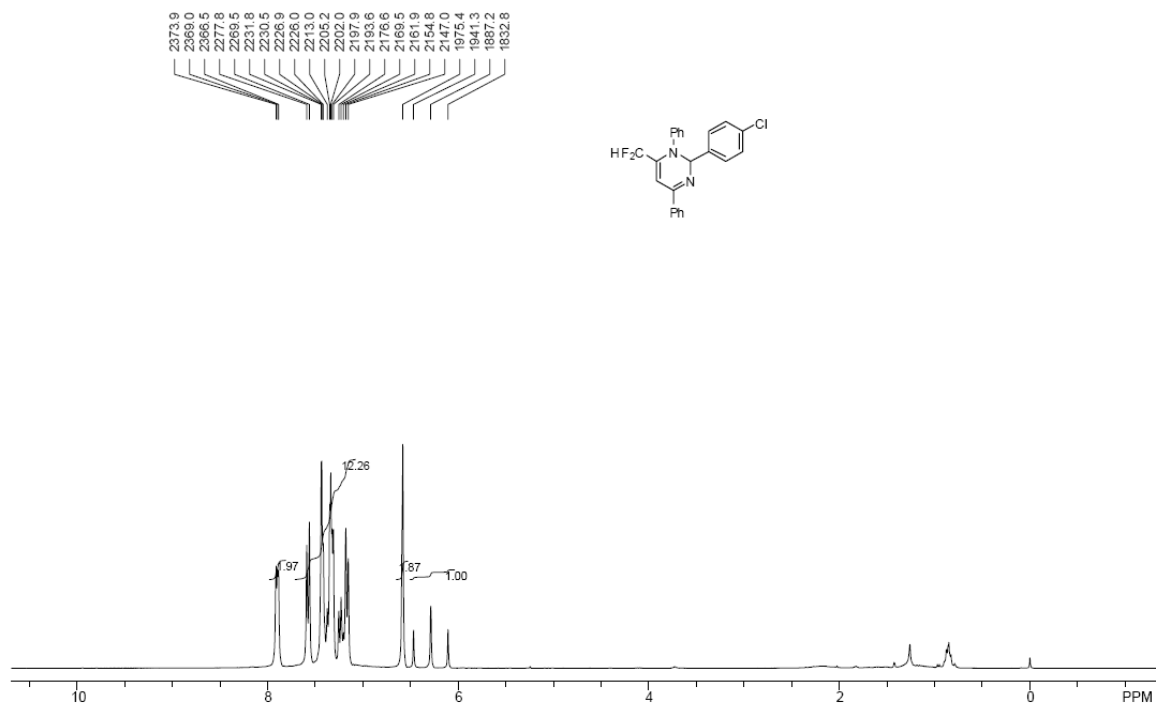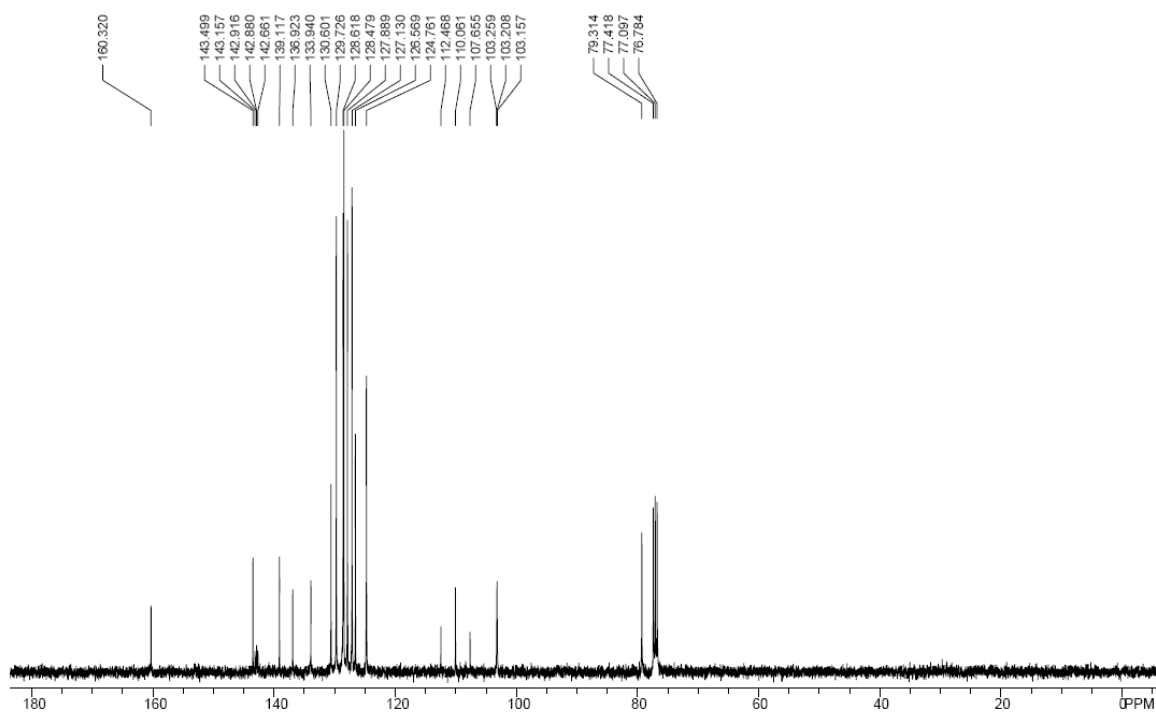

51

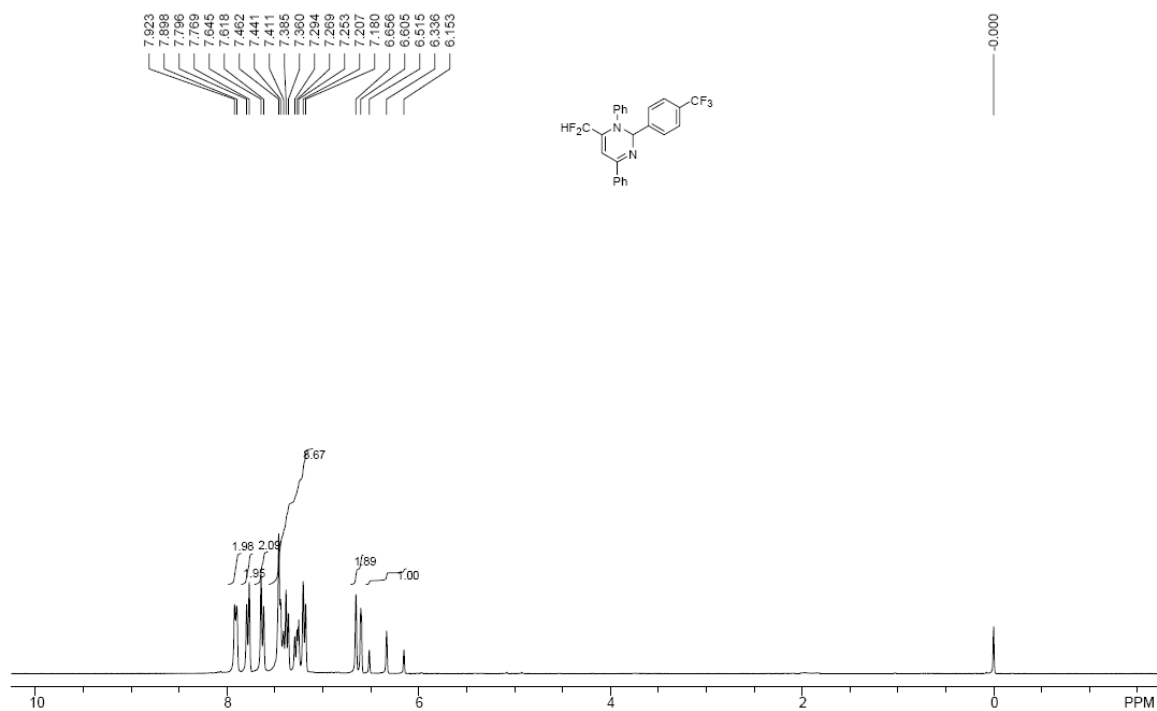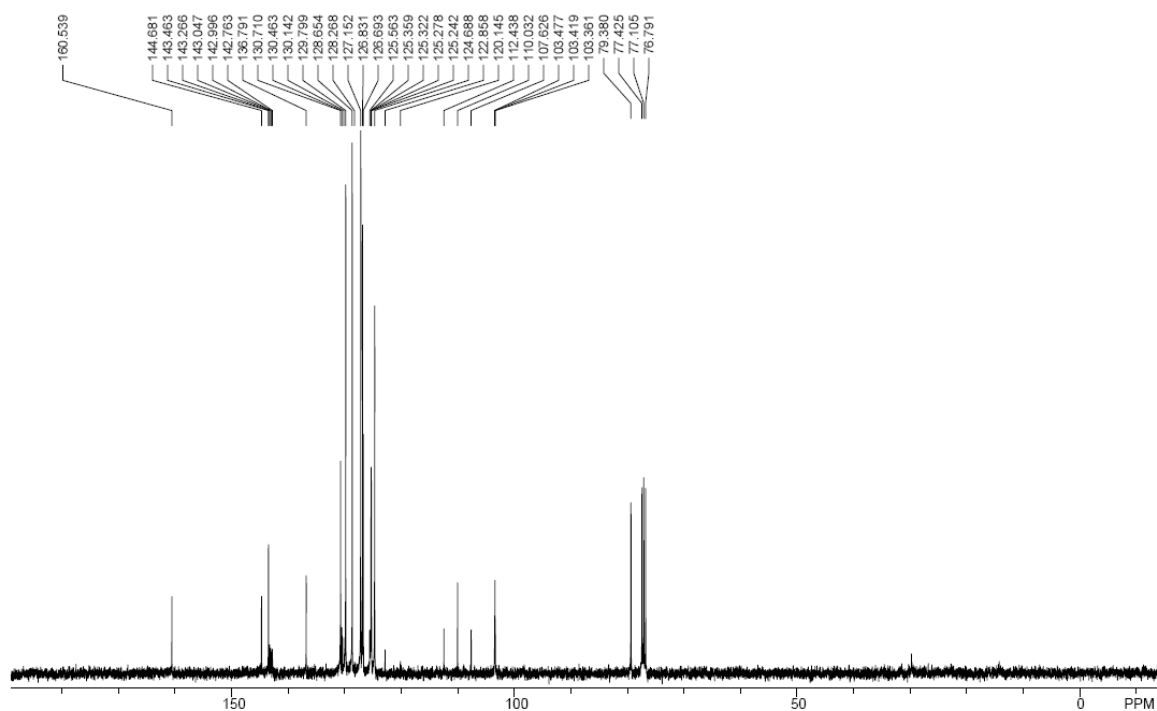

5m

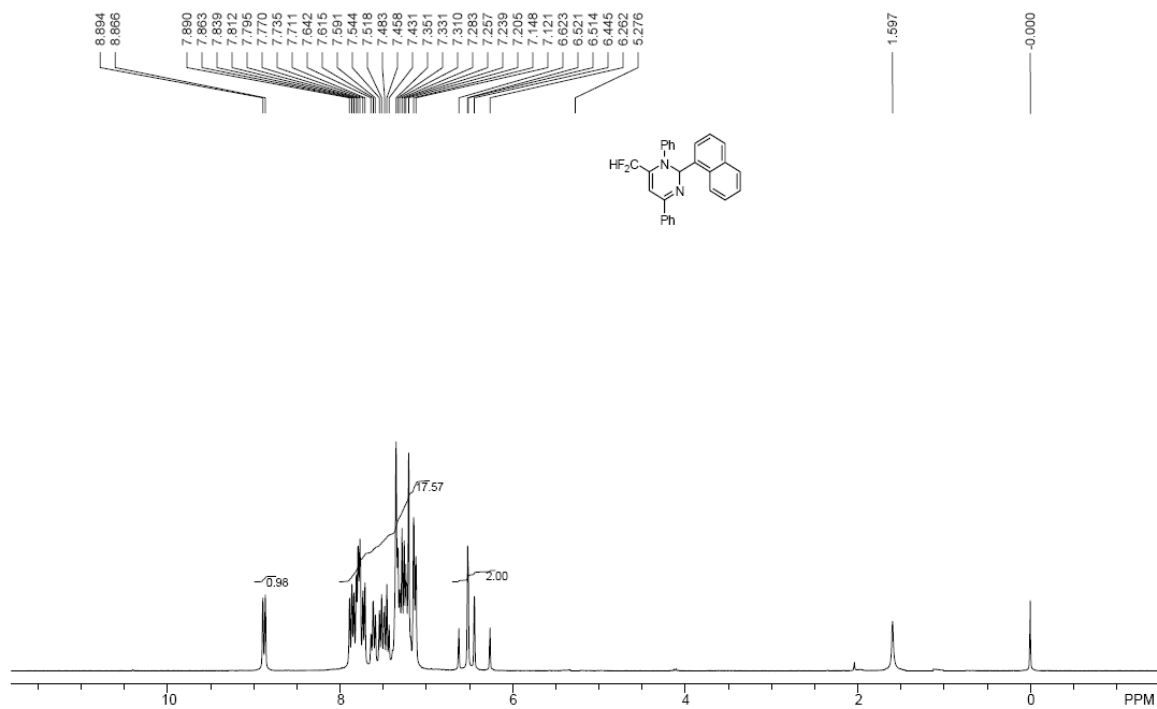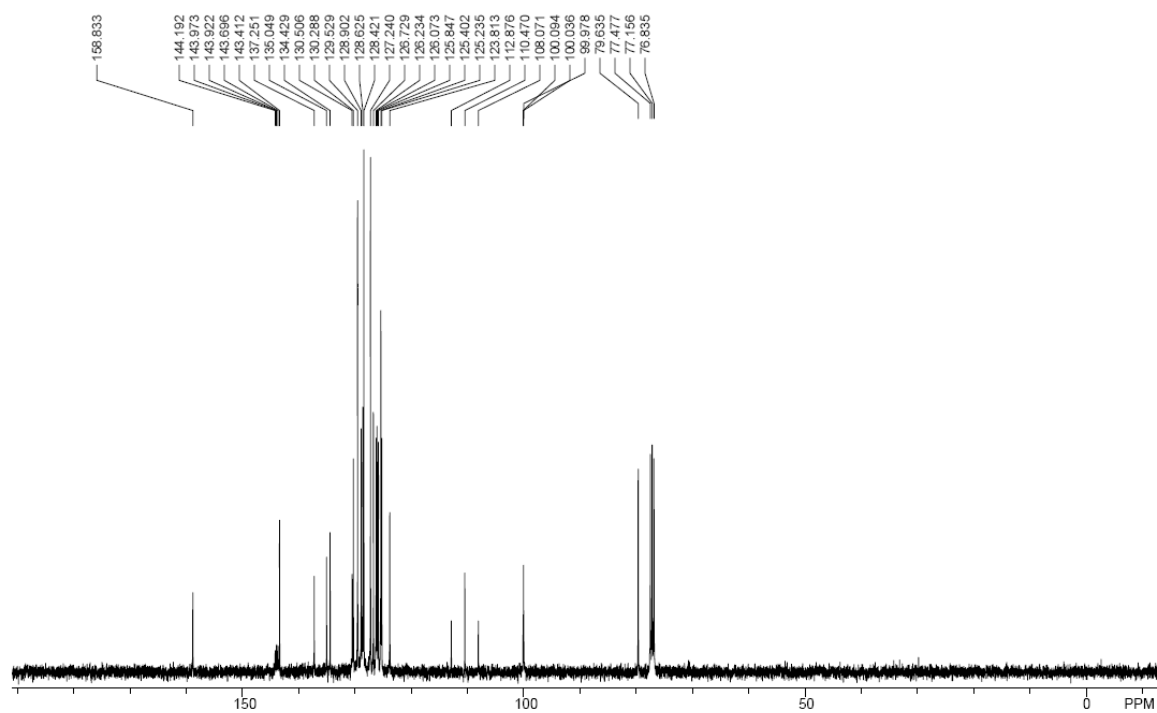

5n

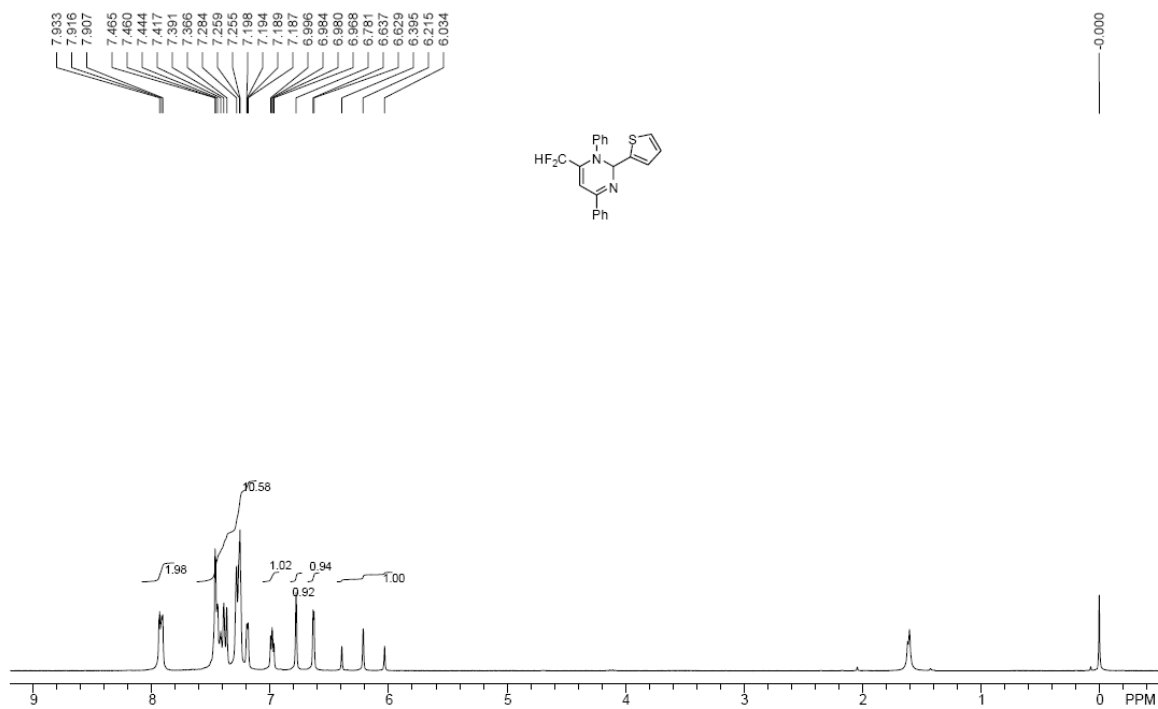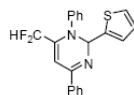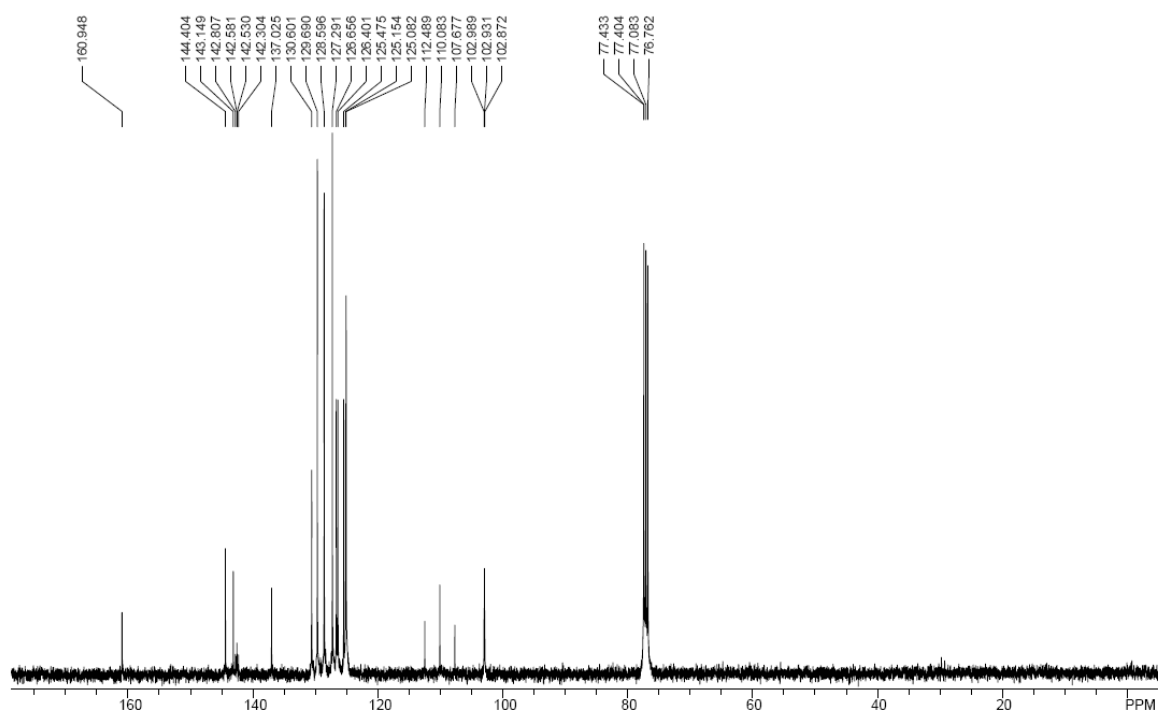

5o

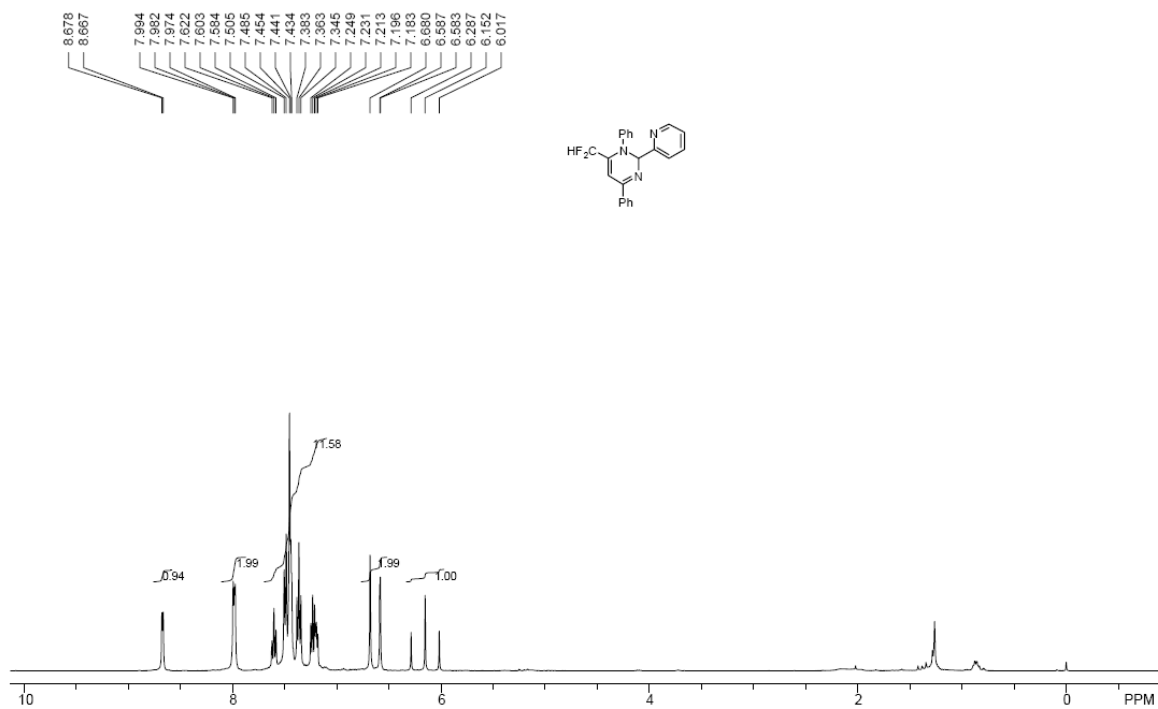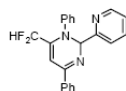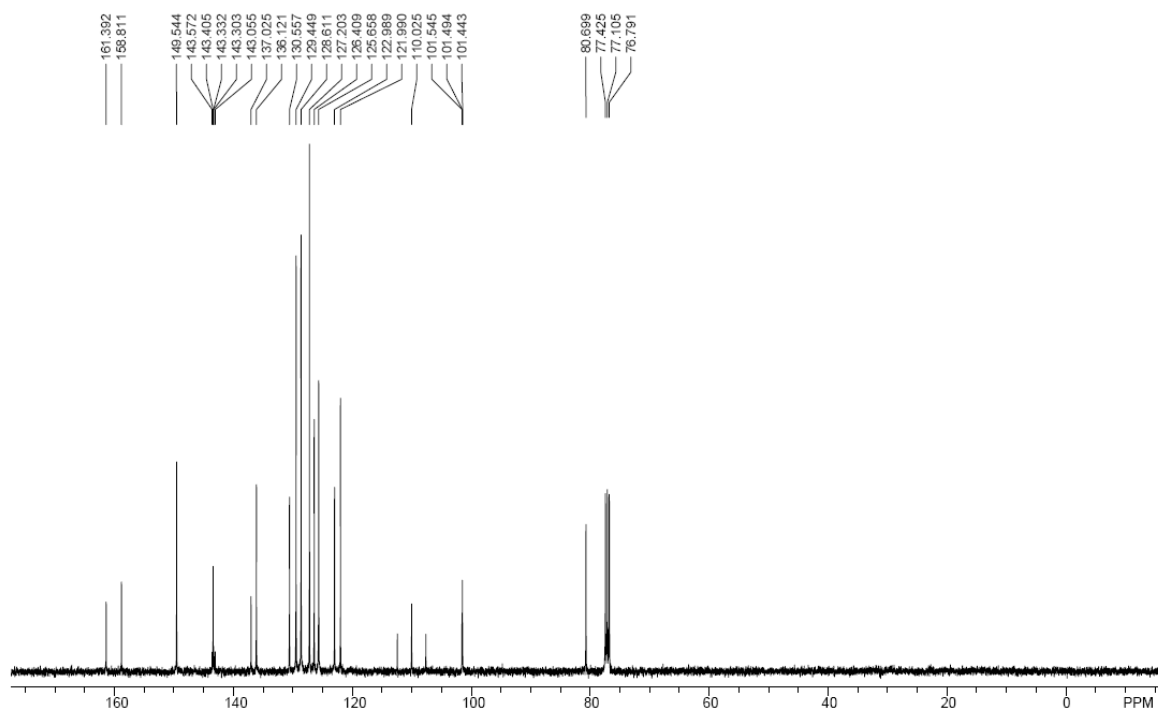



5p

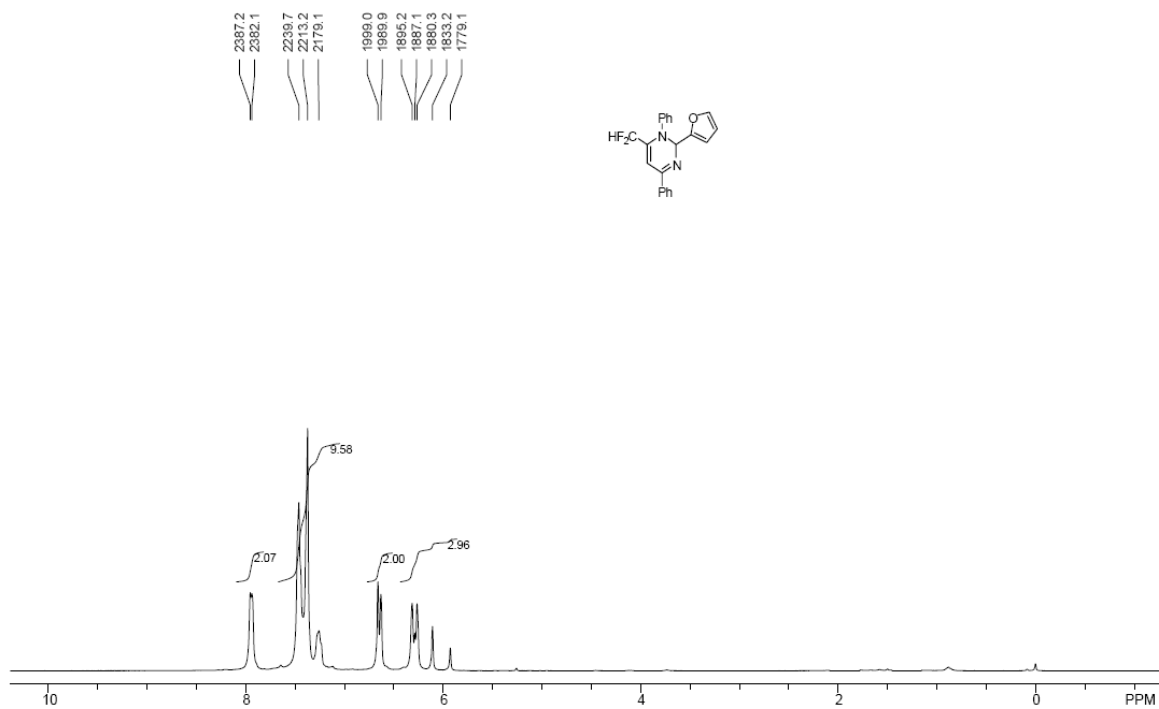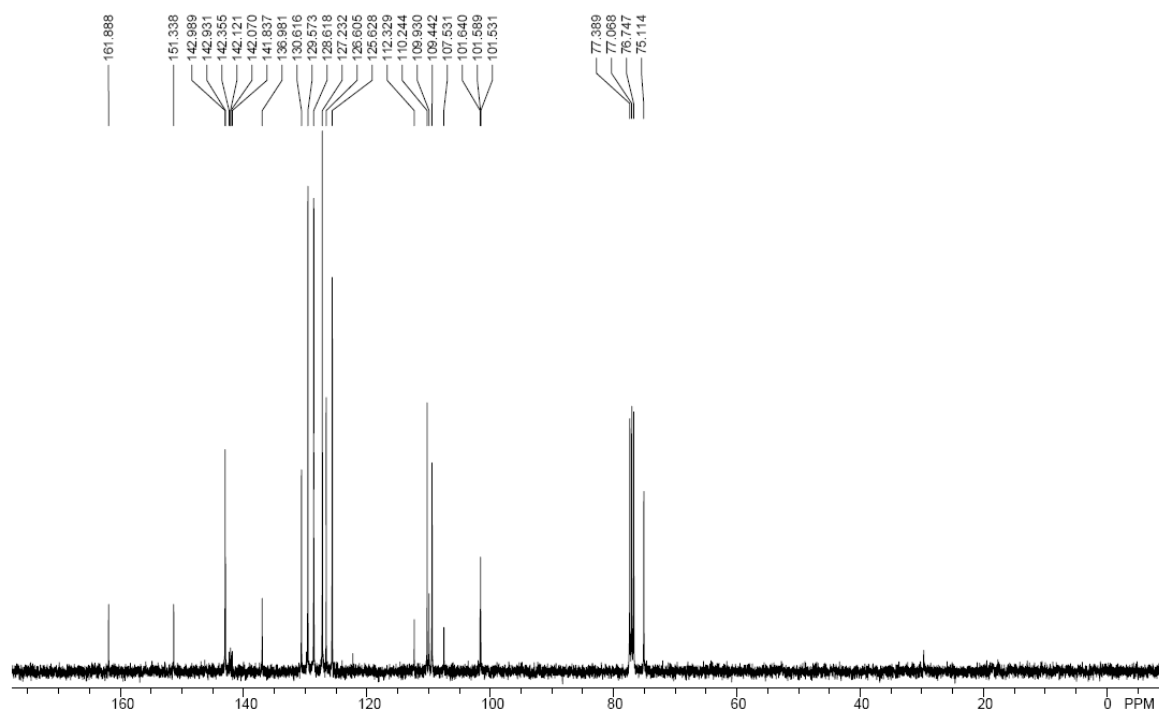

5q

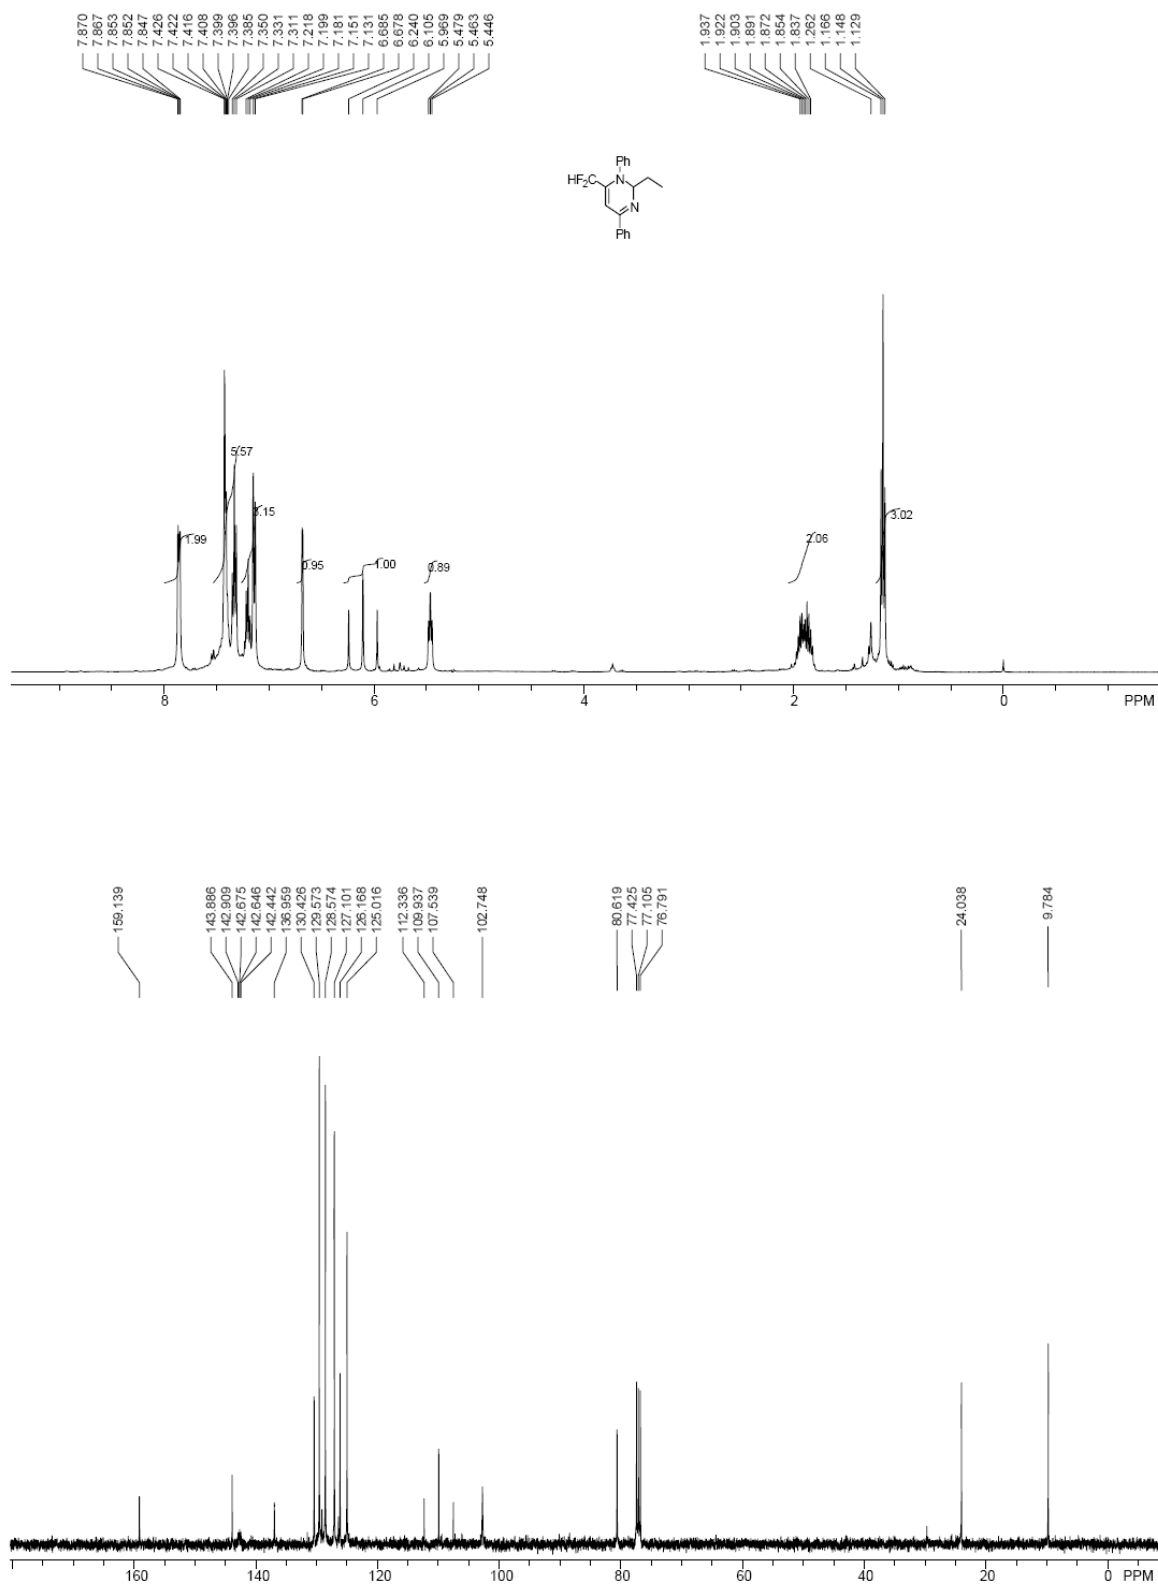

5v

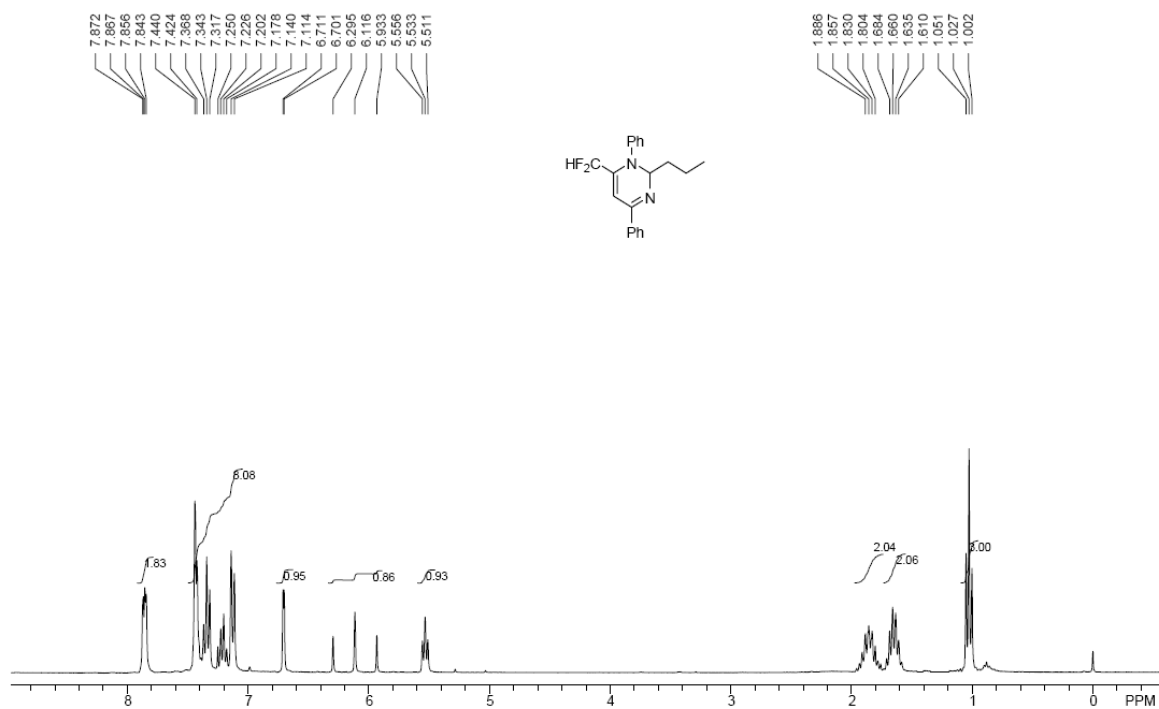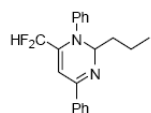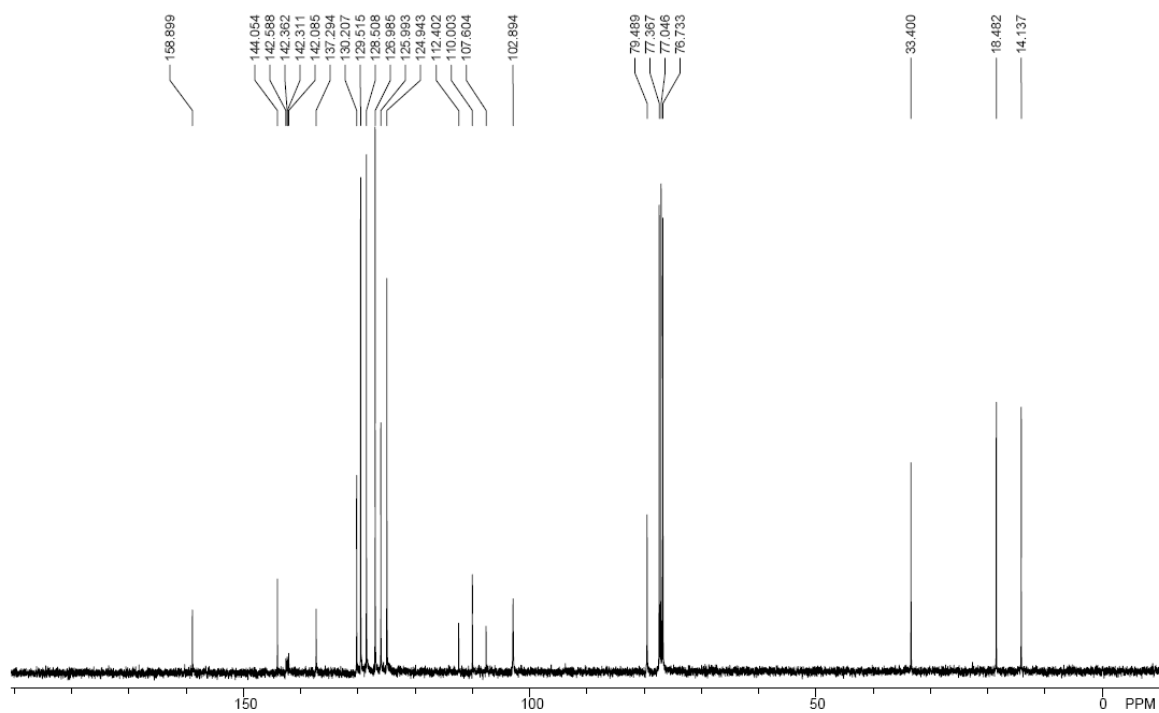

Supplement: c1ob05371j.pdf [file c1ob05371j.pdf]
